# Supplementary material for: Synthesis of novel spirochromane incorporating Schiff's bases, potential antiproliferative activity, and dual EGFR/HER2 inhibition: Cell cycle analysis and in silico study
Source: PubMed Central journal article supplement — Saudi Pharm J. 2023 Sep 28;31(11):101803. doi: 10.1016/j.jsps.2023.101803 (PMC10582582; doi:10.1016/j.jsps.2023.101803), 2023-09-28

Dina Othman-N-CH3-NH2-WH  
Dina Othman-N-CH3-NH2-WH

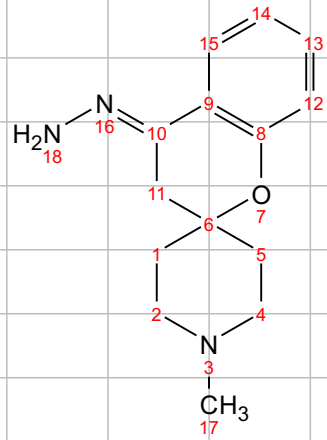

3a

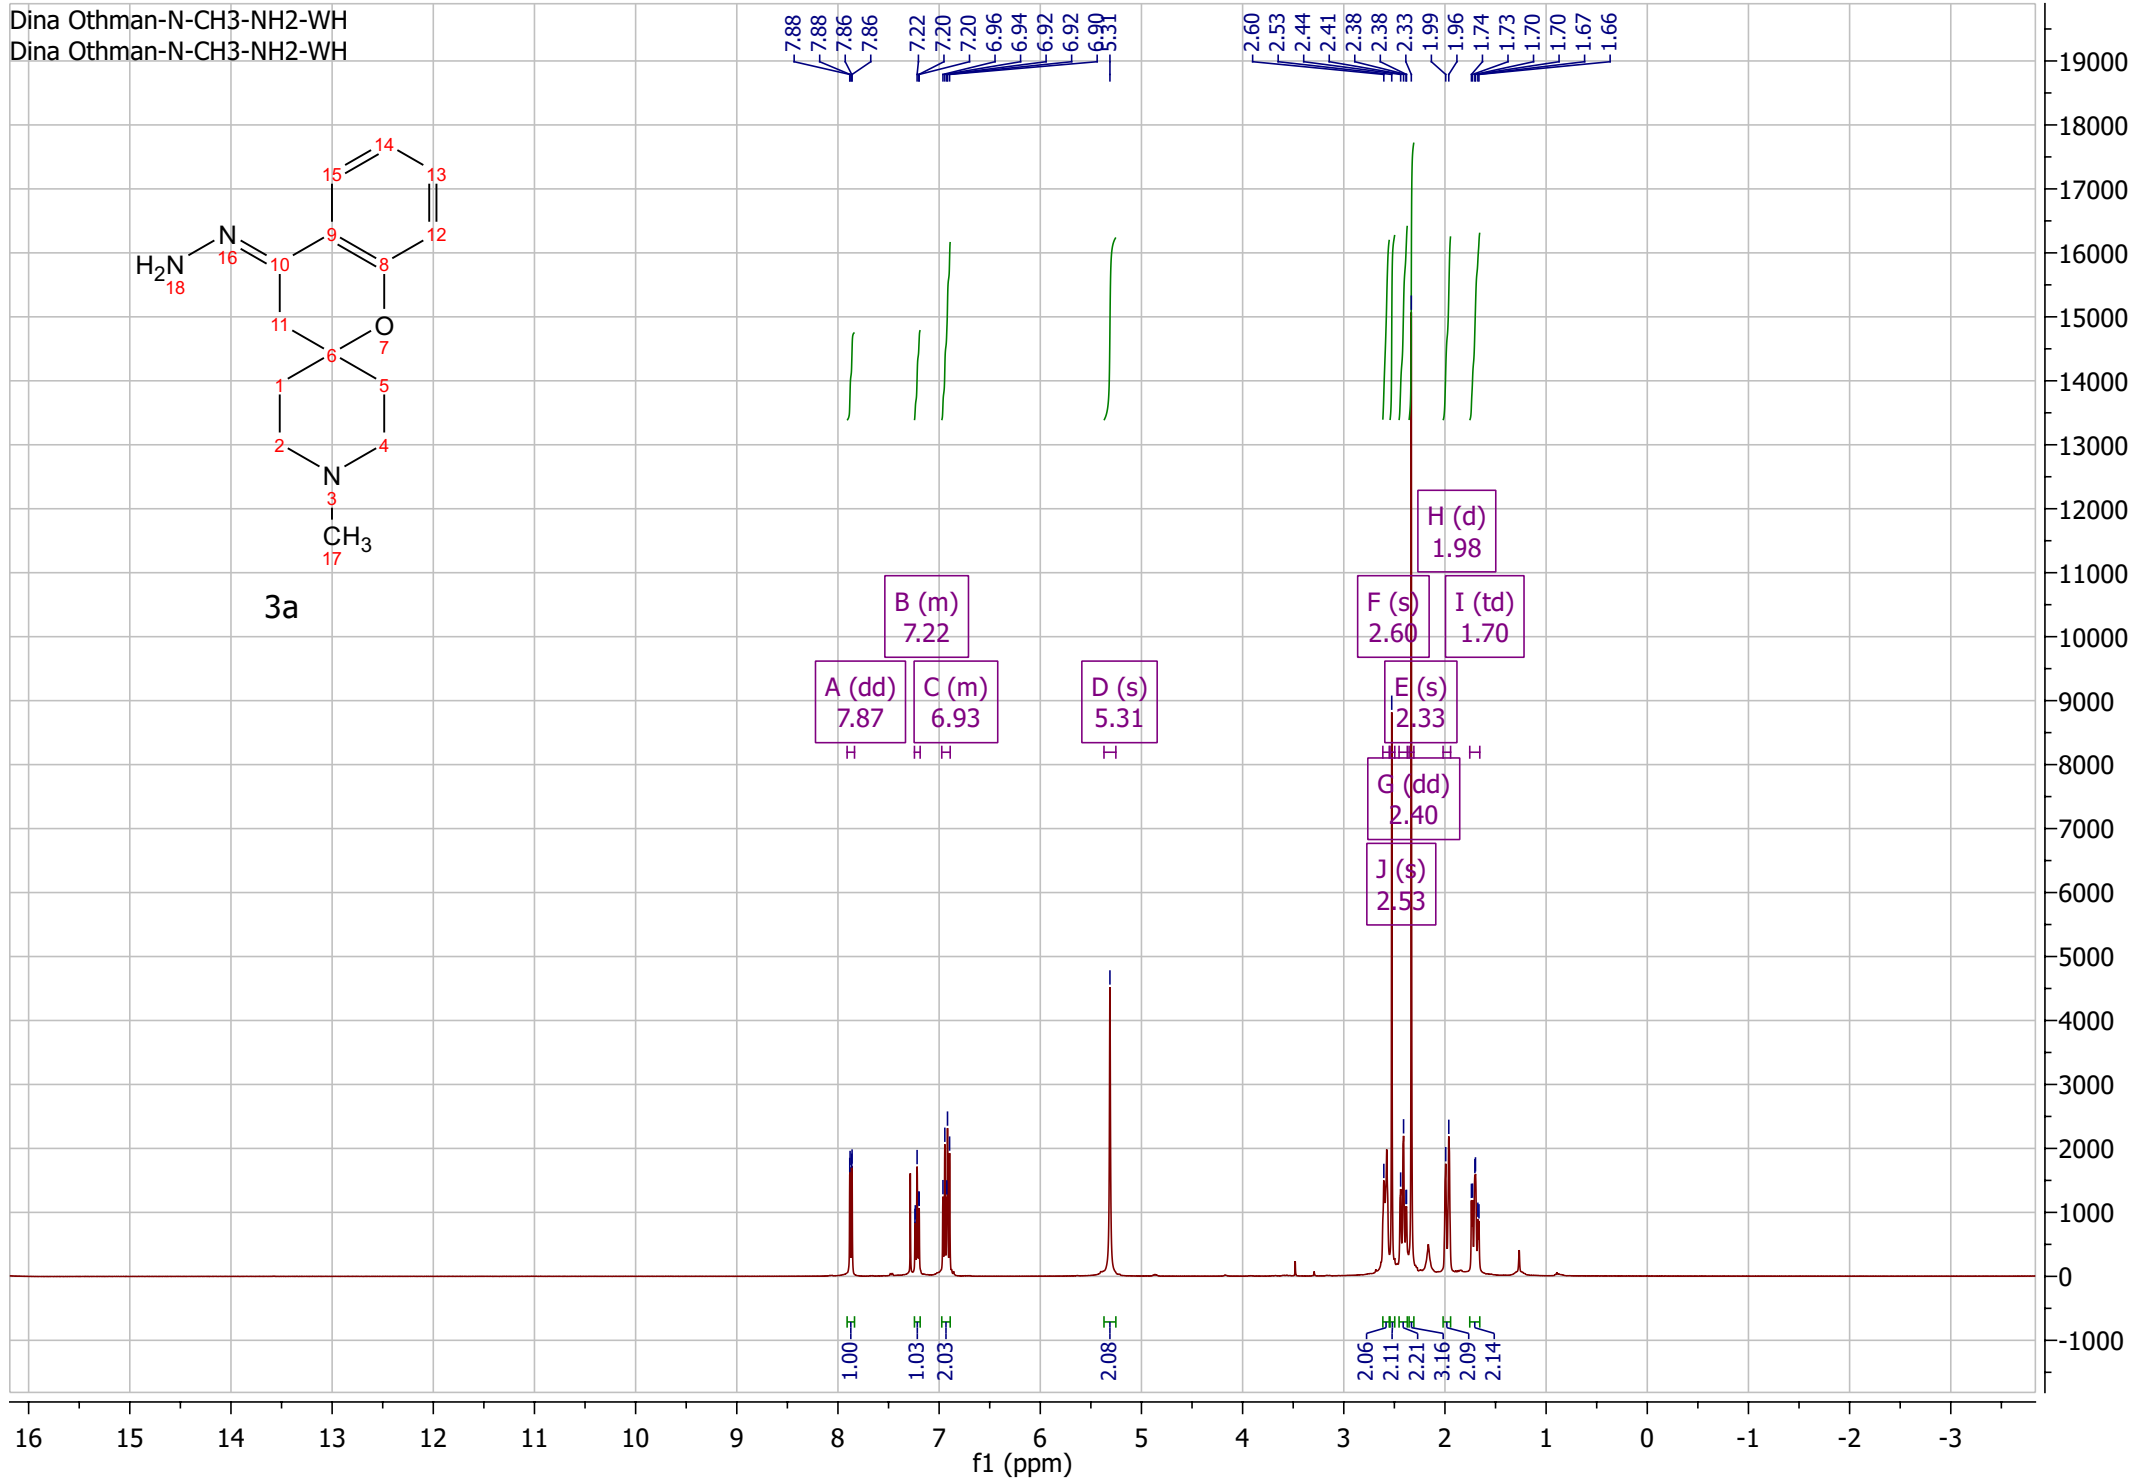

Dina Othman-N-ethyl sp-proton-WH  
Dina Othman-N-ethyl sp-proton-WH

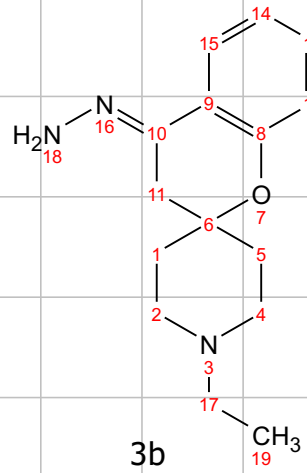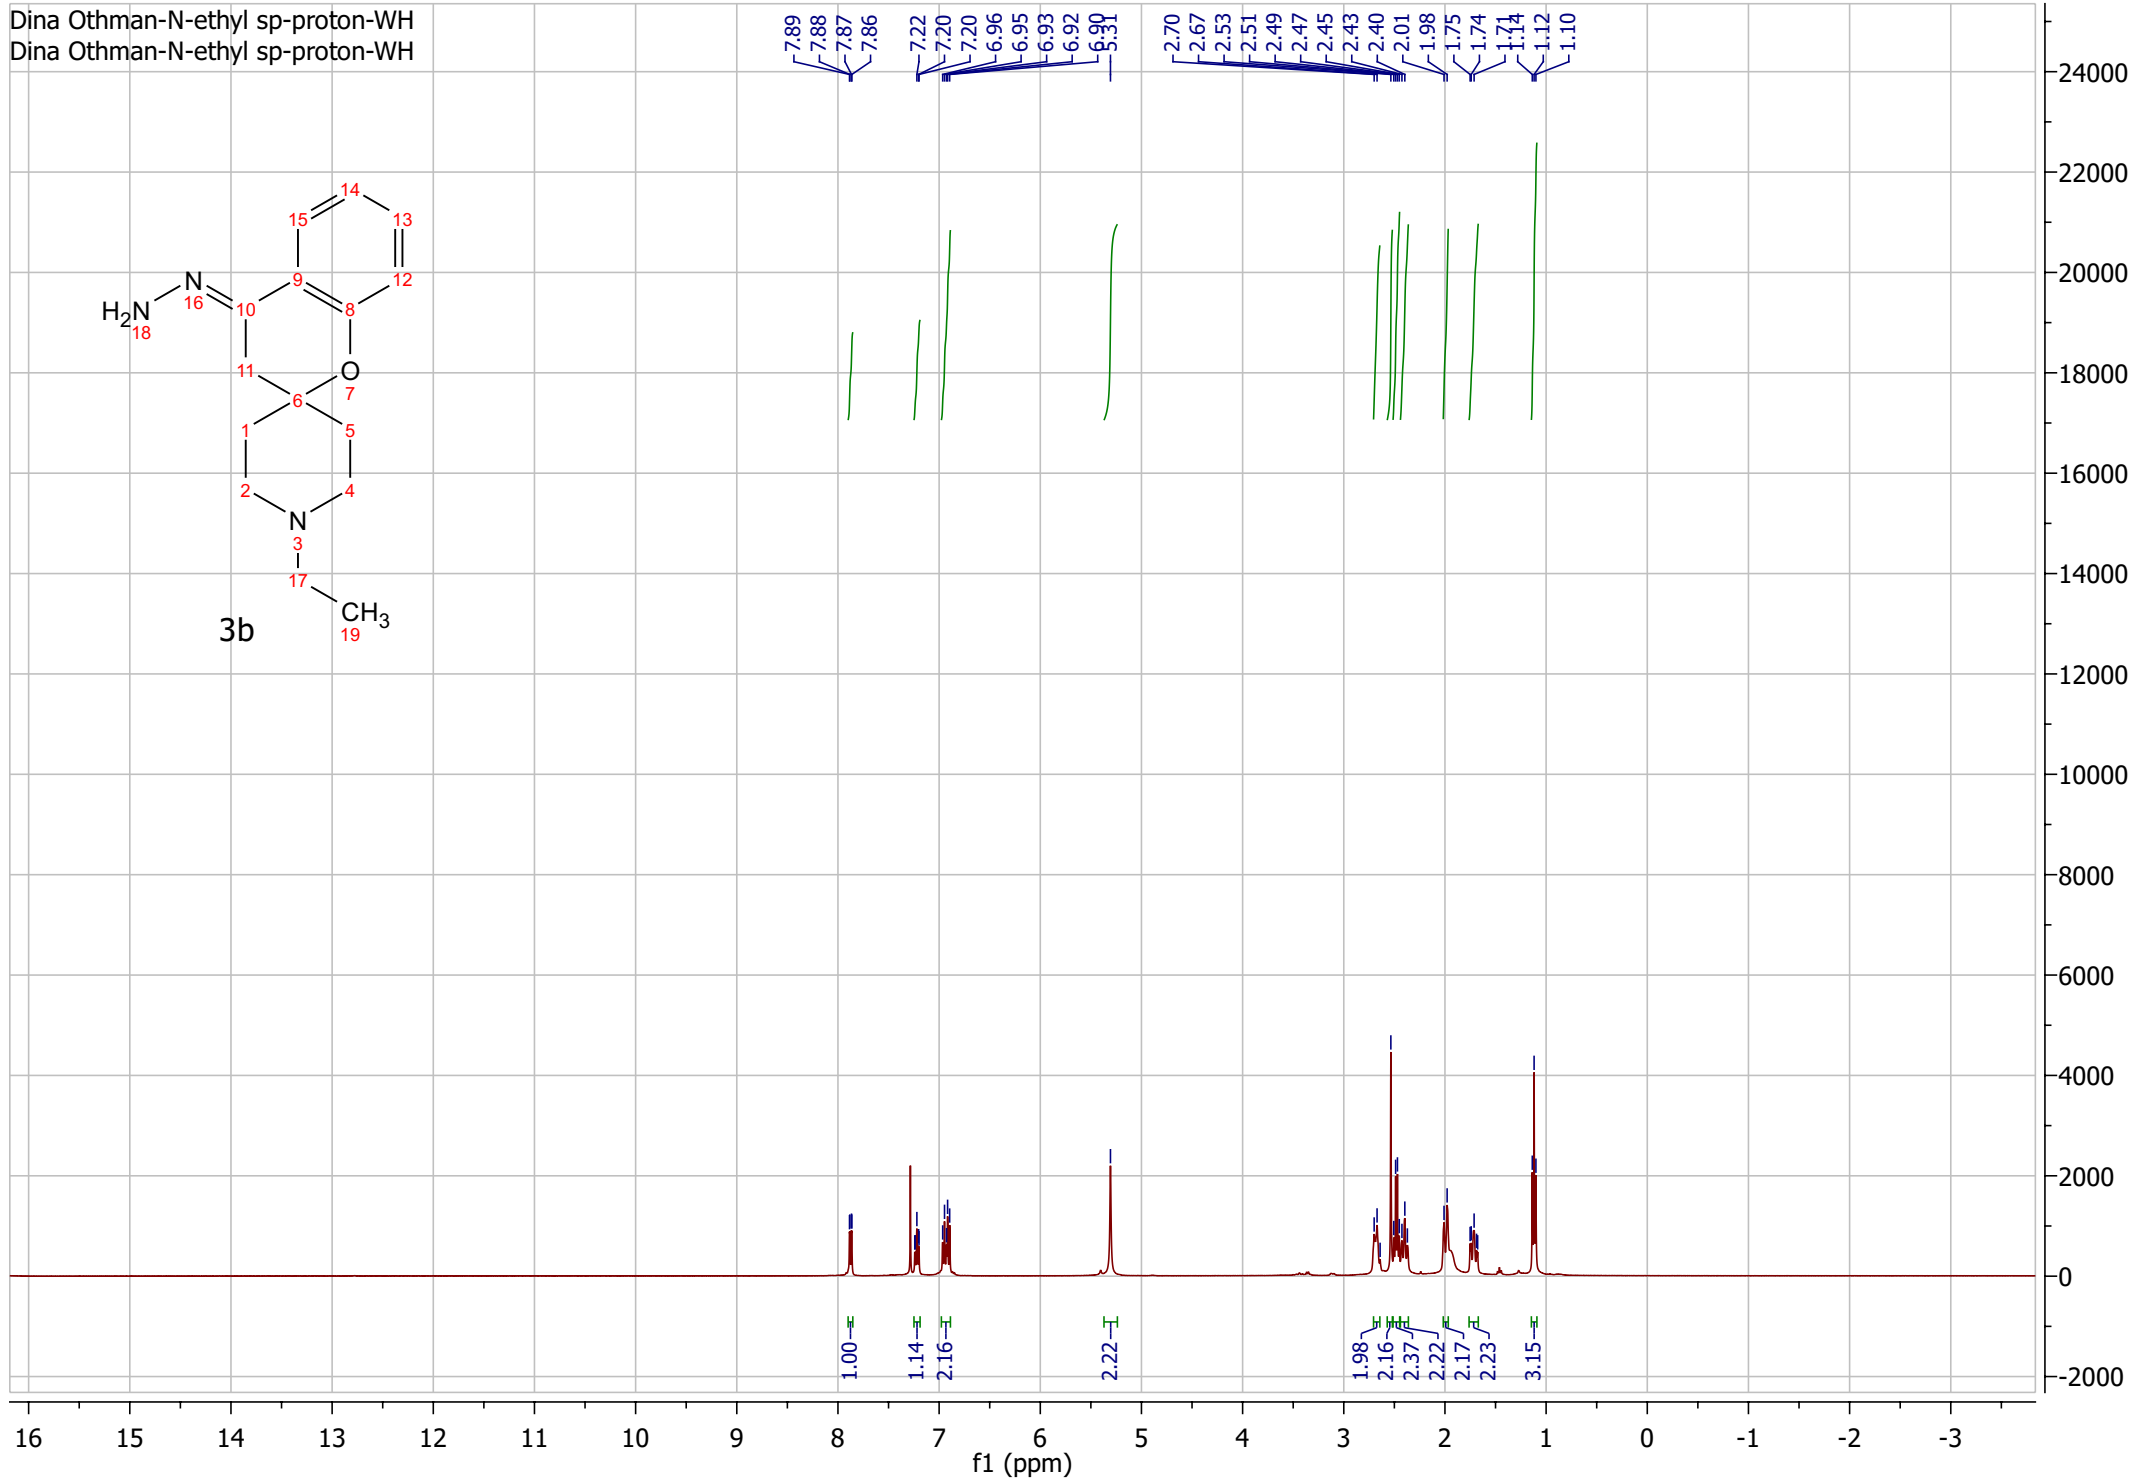

Walaa Elhusseiny-S2-proton-WH  
Walaa Elhusseiny-S2-proton-WH

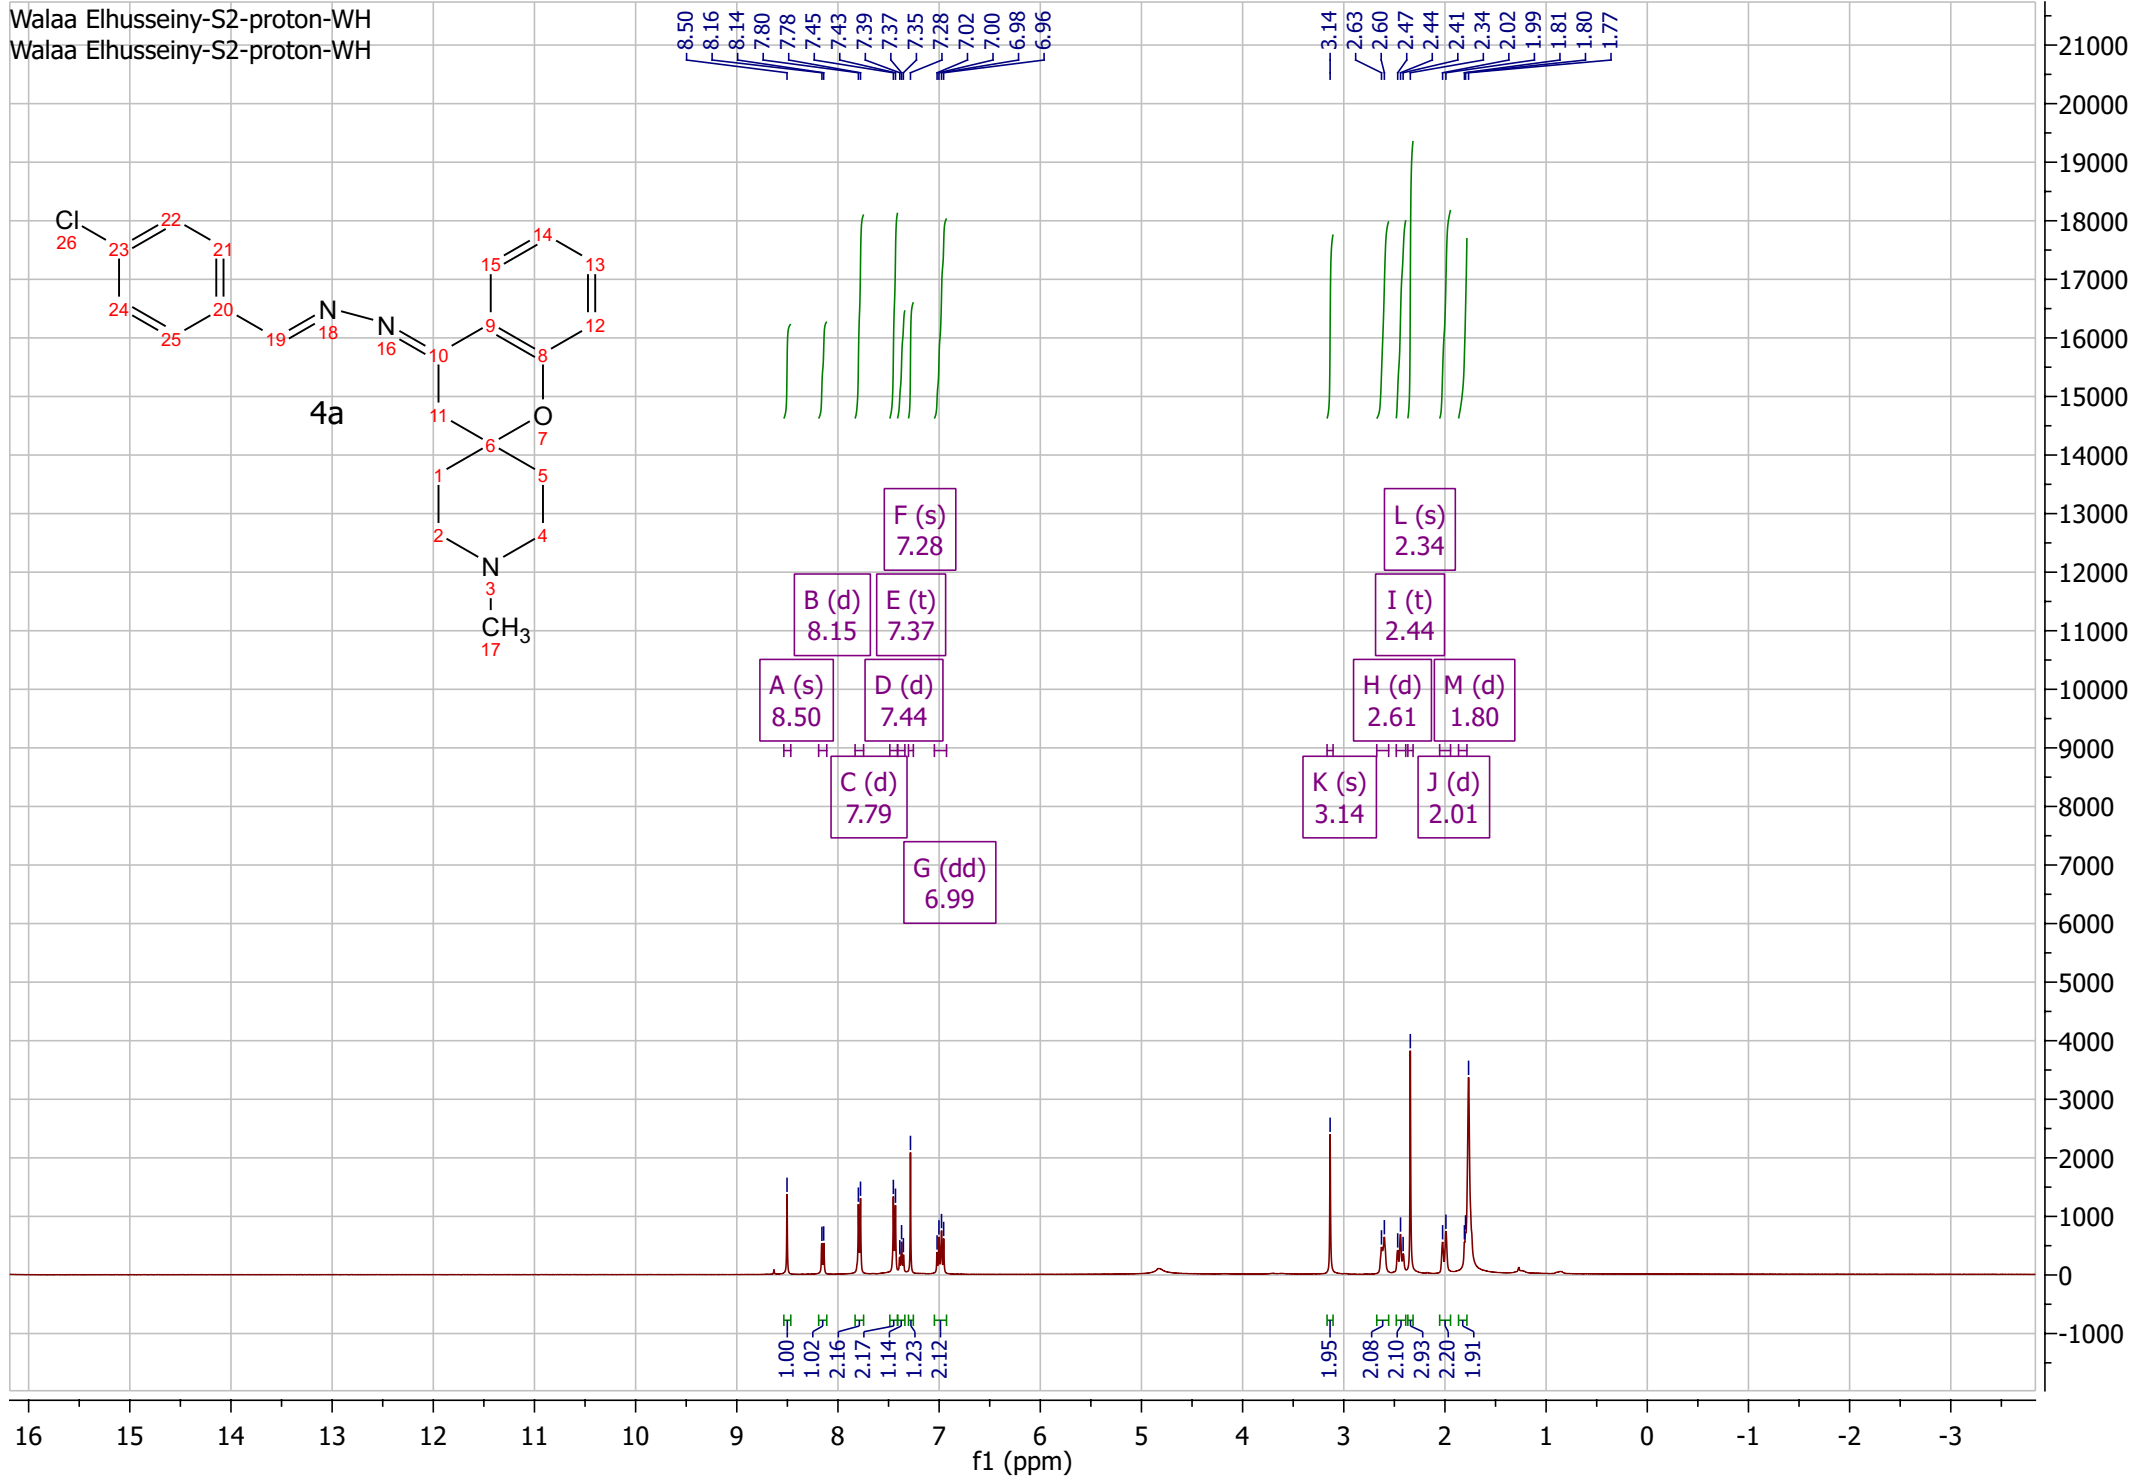

Walaa Elhusseiny-S1-proton-WH  
Walaa Elhusseiny-S1-proton-WH

8.48  
8.17  
8.15  
7.75  
7.72  
7.36  
7.33  
7.32  
7.28  
7.01  
6.99  
6.97  
6.96  
6.94  
6.76  
6.74  
6.69

3.58  
3.19  
3.11  
3.07  
3.03  
2.62  
2.59  
2.47  
2.44  
2.42  
2.34  
2.02  
1.99  
1.81  
1.80  
1.75

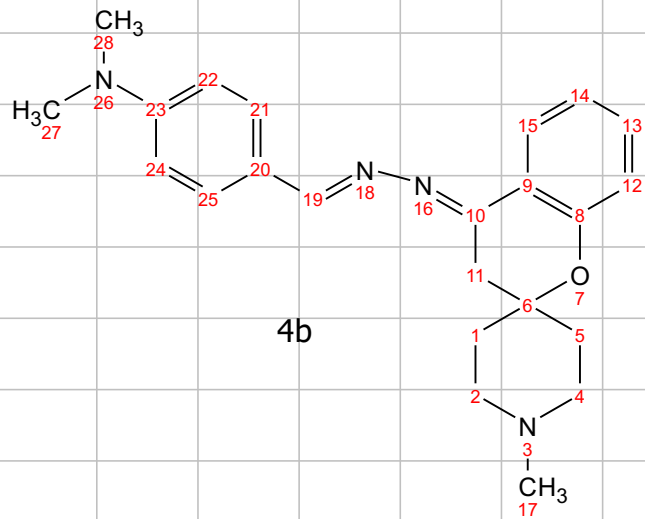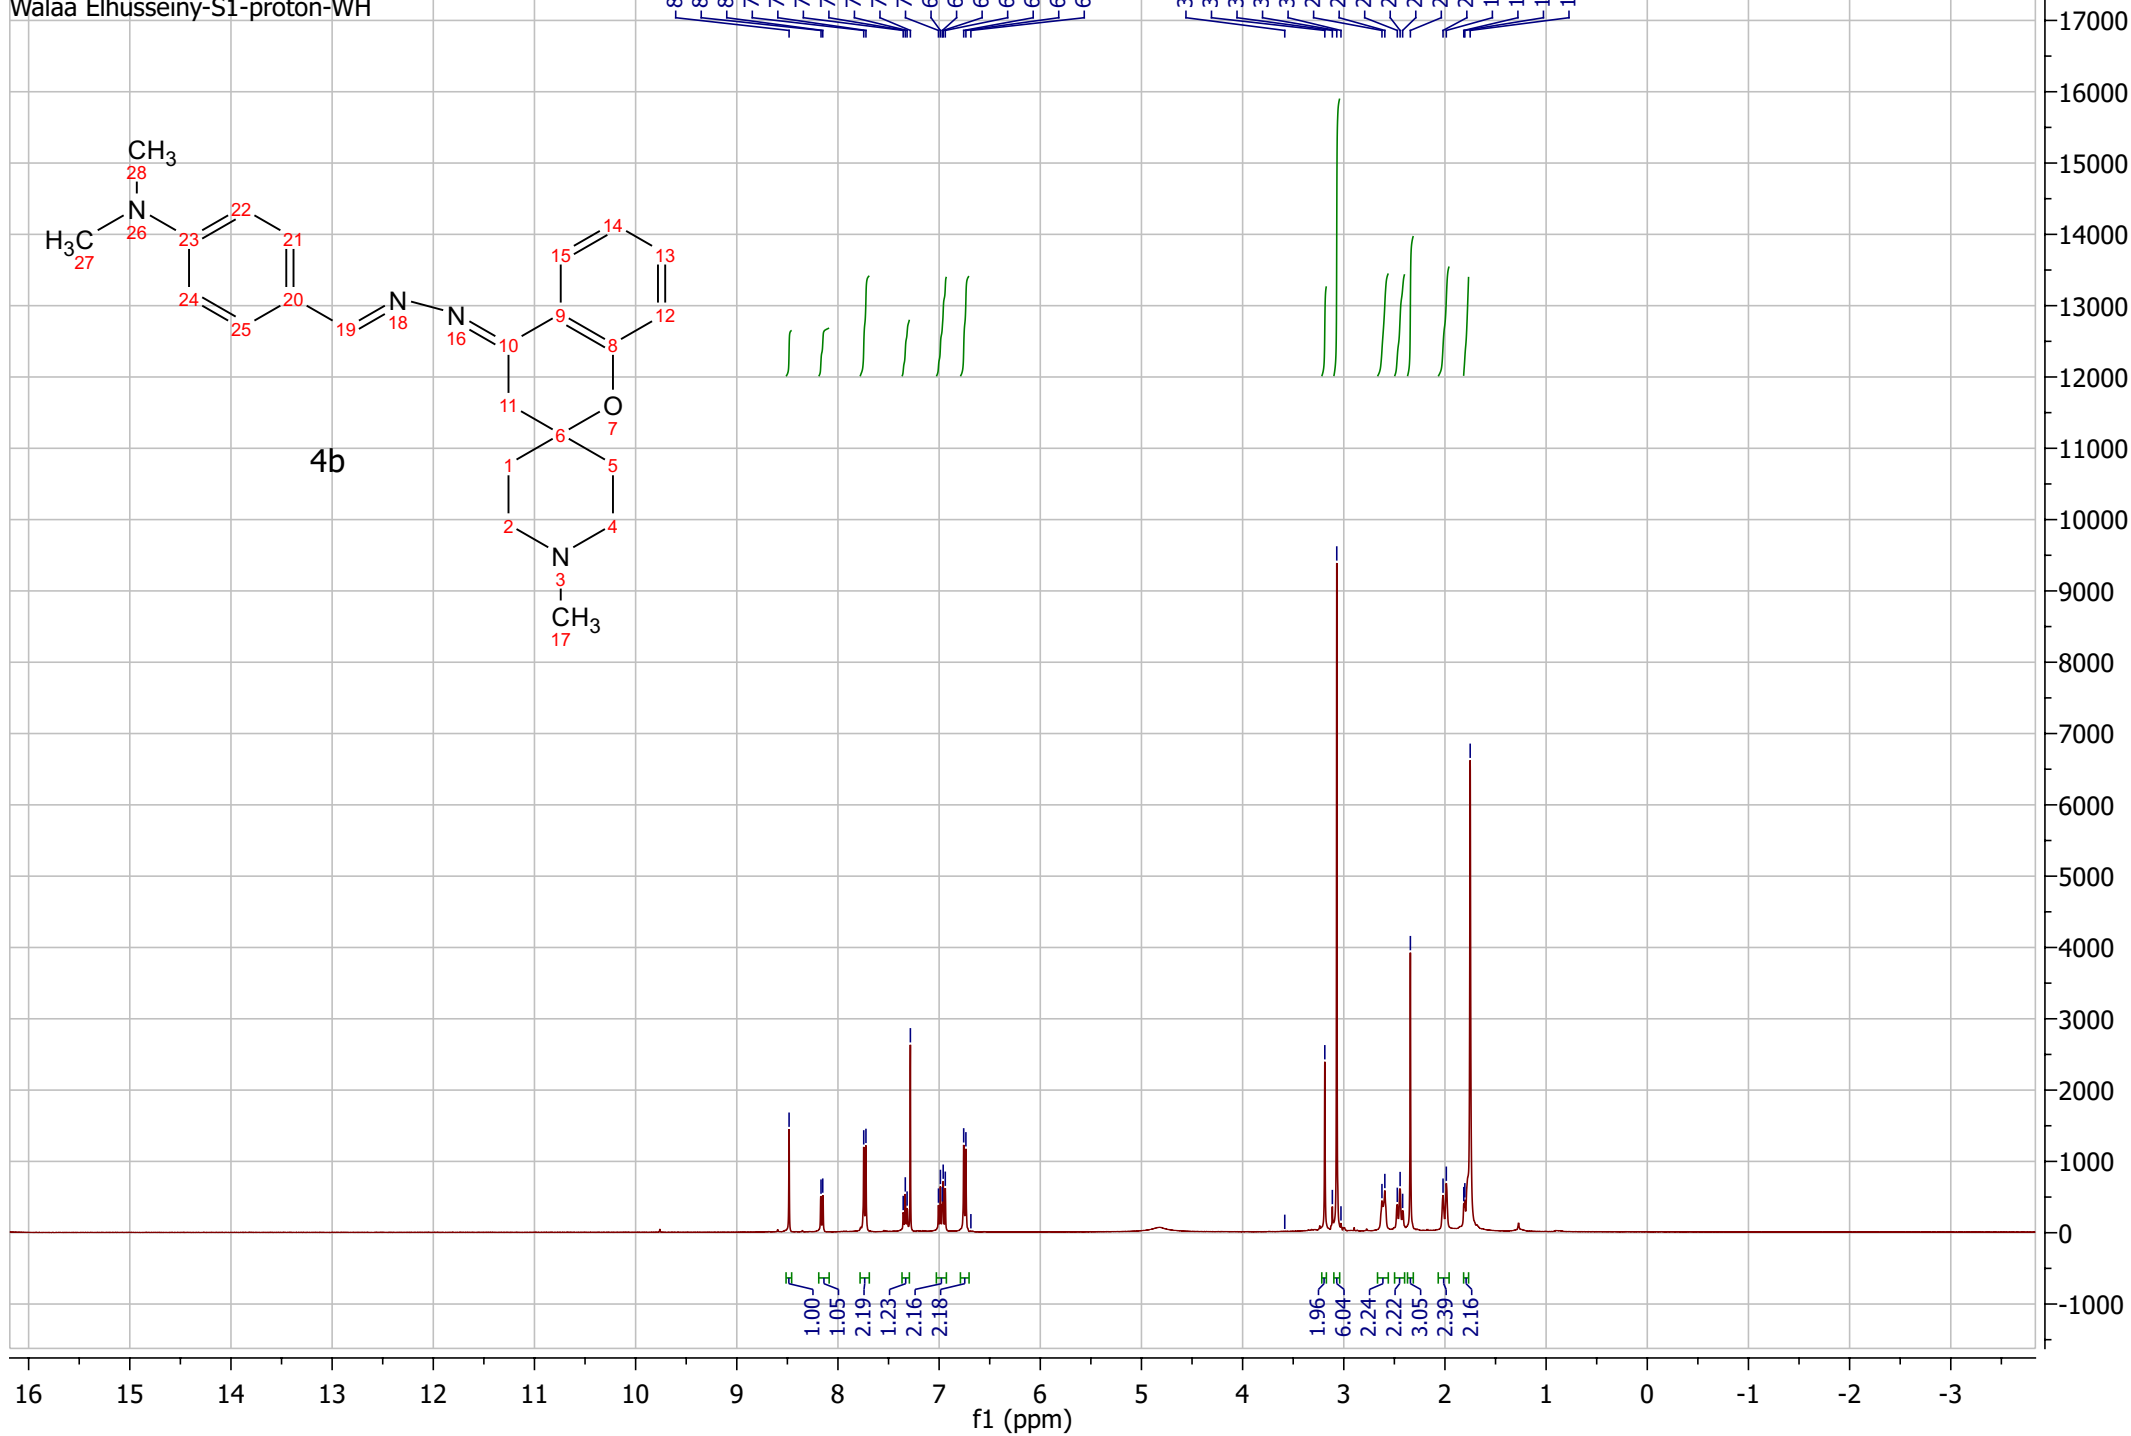

Walaa Elhusseiny-SO1-poton-WH  
Walaa Elhusseiny-SO1-poton-WH

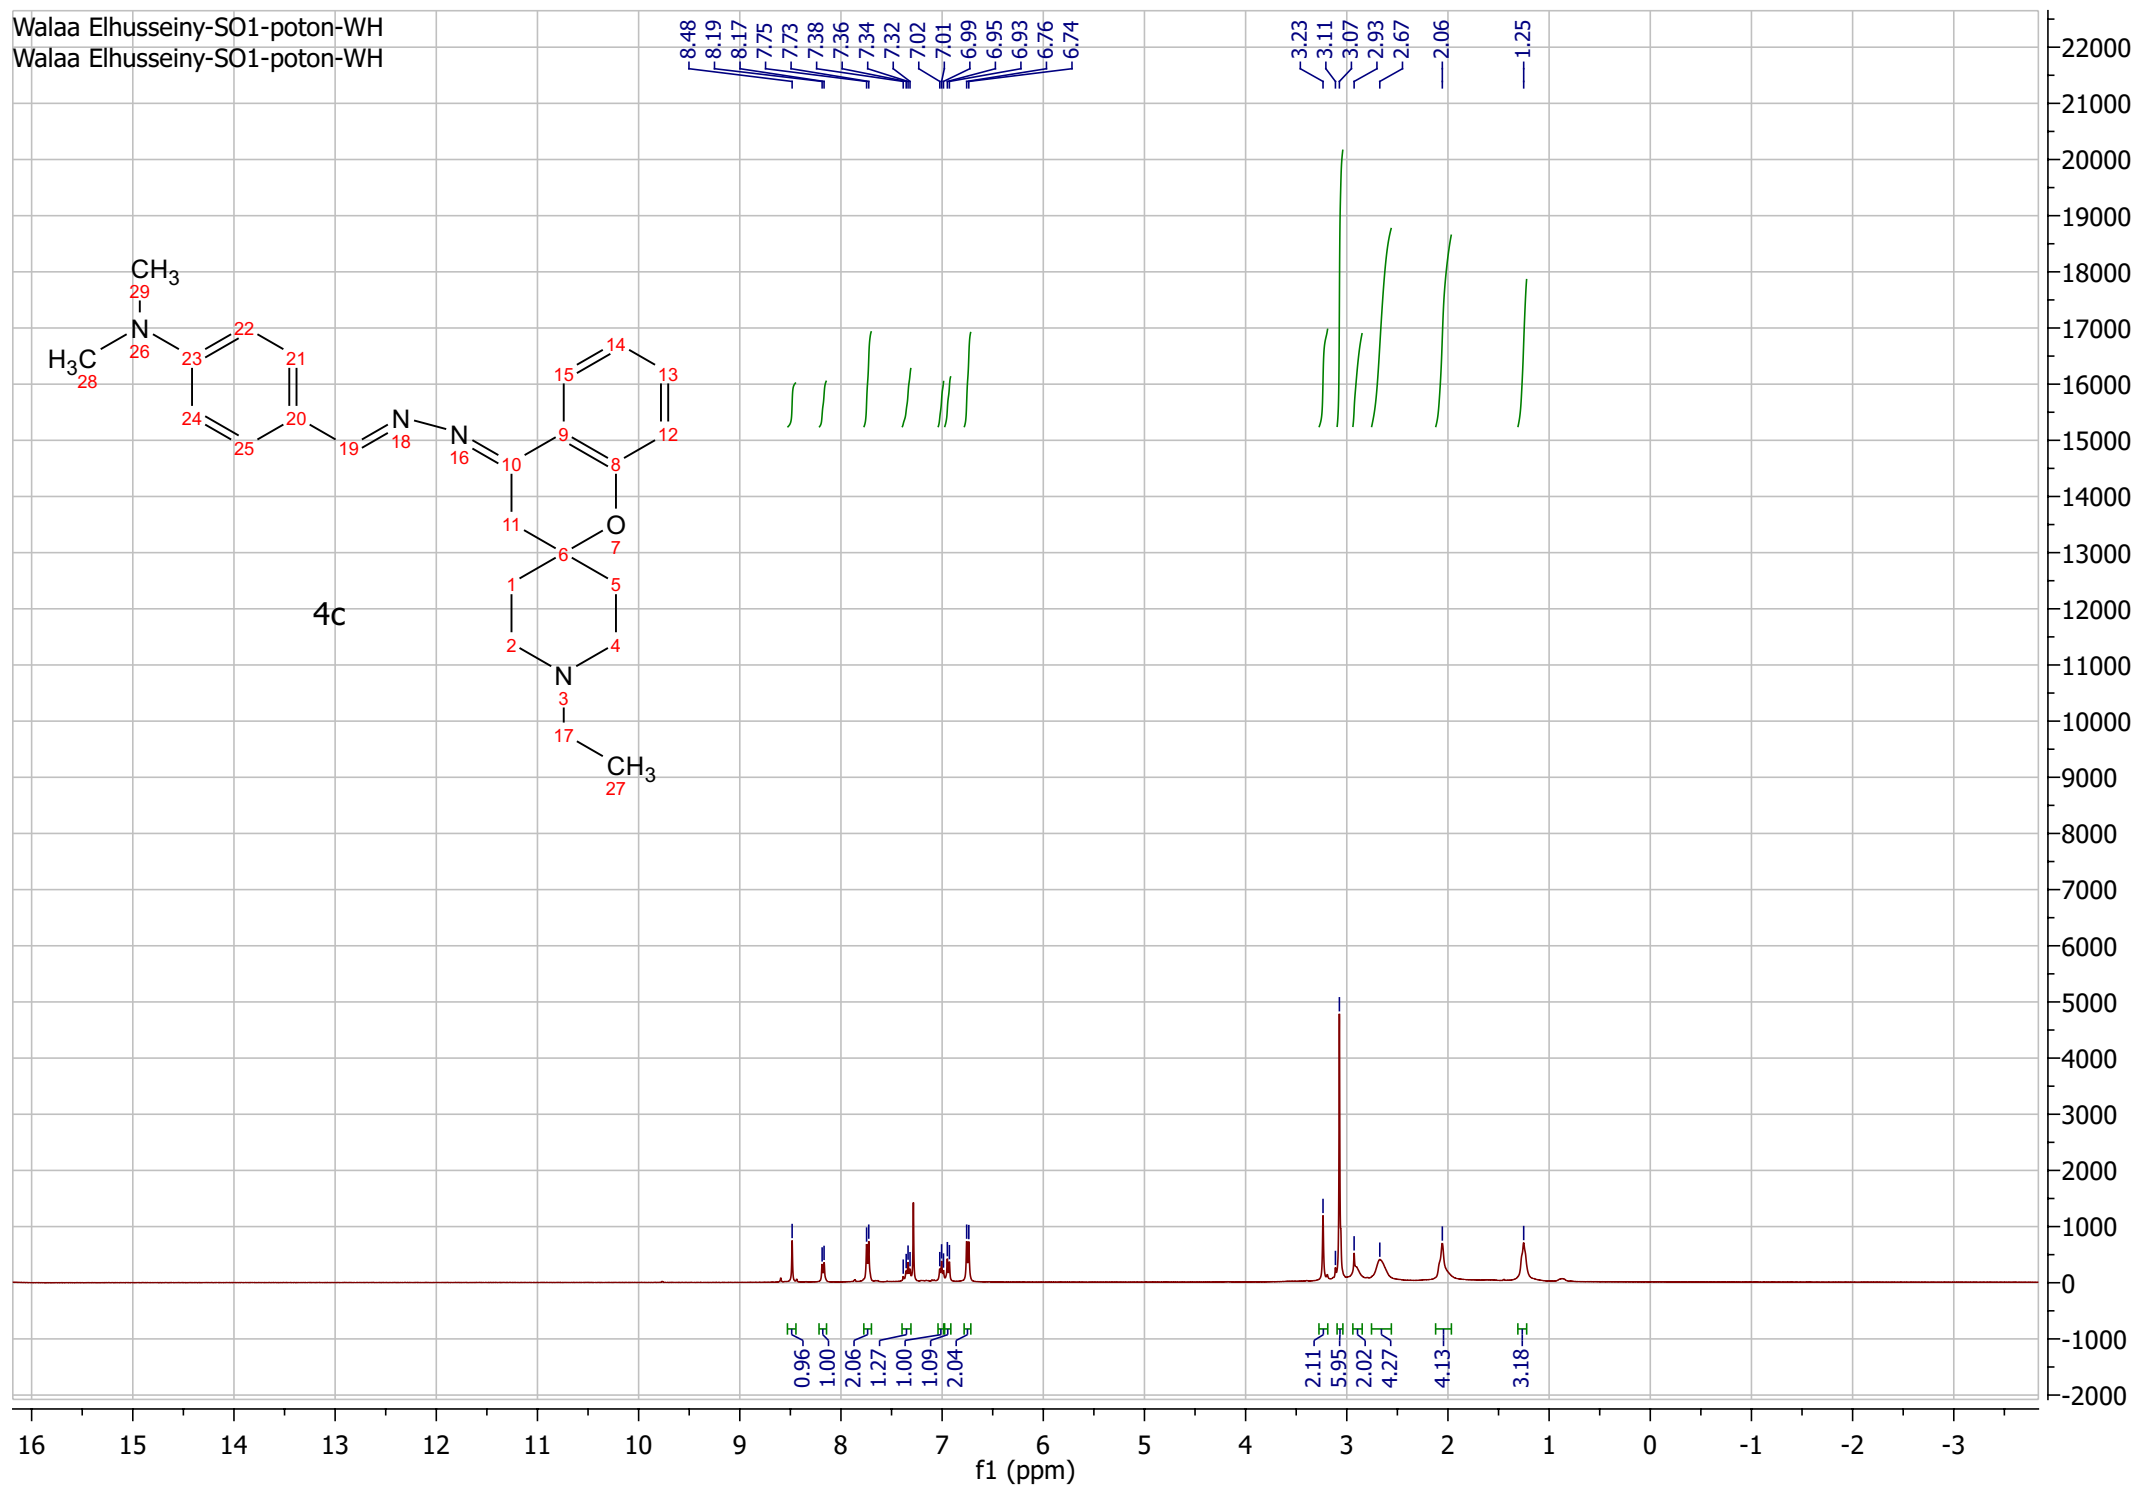

Walaa Elhusseiny-S3-proton-WH  
Walaa Elhusseiny-S3-proton-WH

8.48  
8.17  
8.15  
7.74  
7.72  
7.38  
7.36  
7.34  
7.28  
7.02  
7.01  
6.99  
6.97  
6.95  
6.87  
6.85

3.15  
3.00  
2.79  
2.76  
2.58  
2.55  
2.52  
2.42  
2.05  
2.01  
1.85  
1.82  
1.79

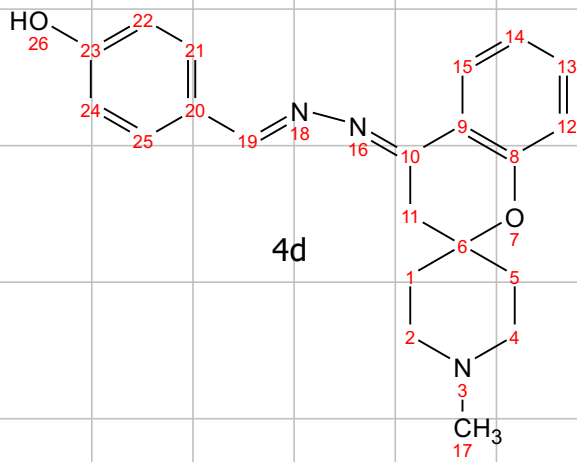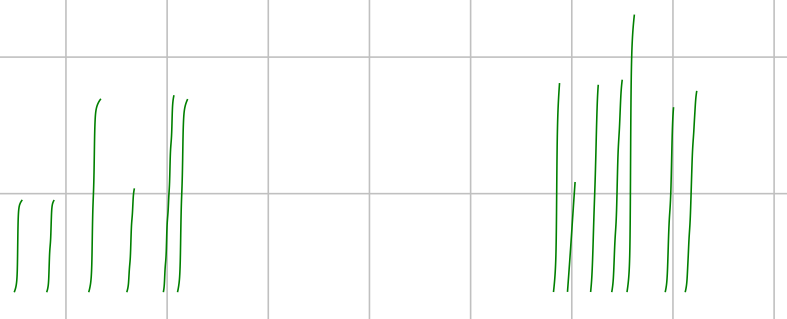

1.00  
1.00  
2.09  
1.12  
2.13  
2.09

2.26  
1.19  
2.25  
2.30  
3.00  
2.00  
2.18

16 15 14 13 12 11 10 9 8 7 6 5 4 3 2 1 0 -1 -2 -3  
f1 (ppm)

Walaa Elhousseiny-SO3-poton-WH  
Walaa Elhousseiny-SO3-poton-WH

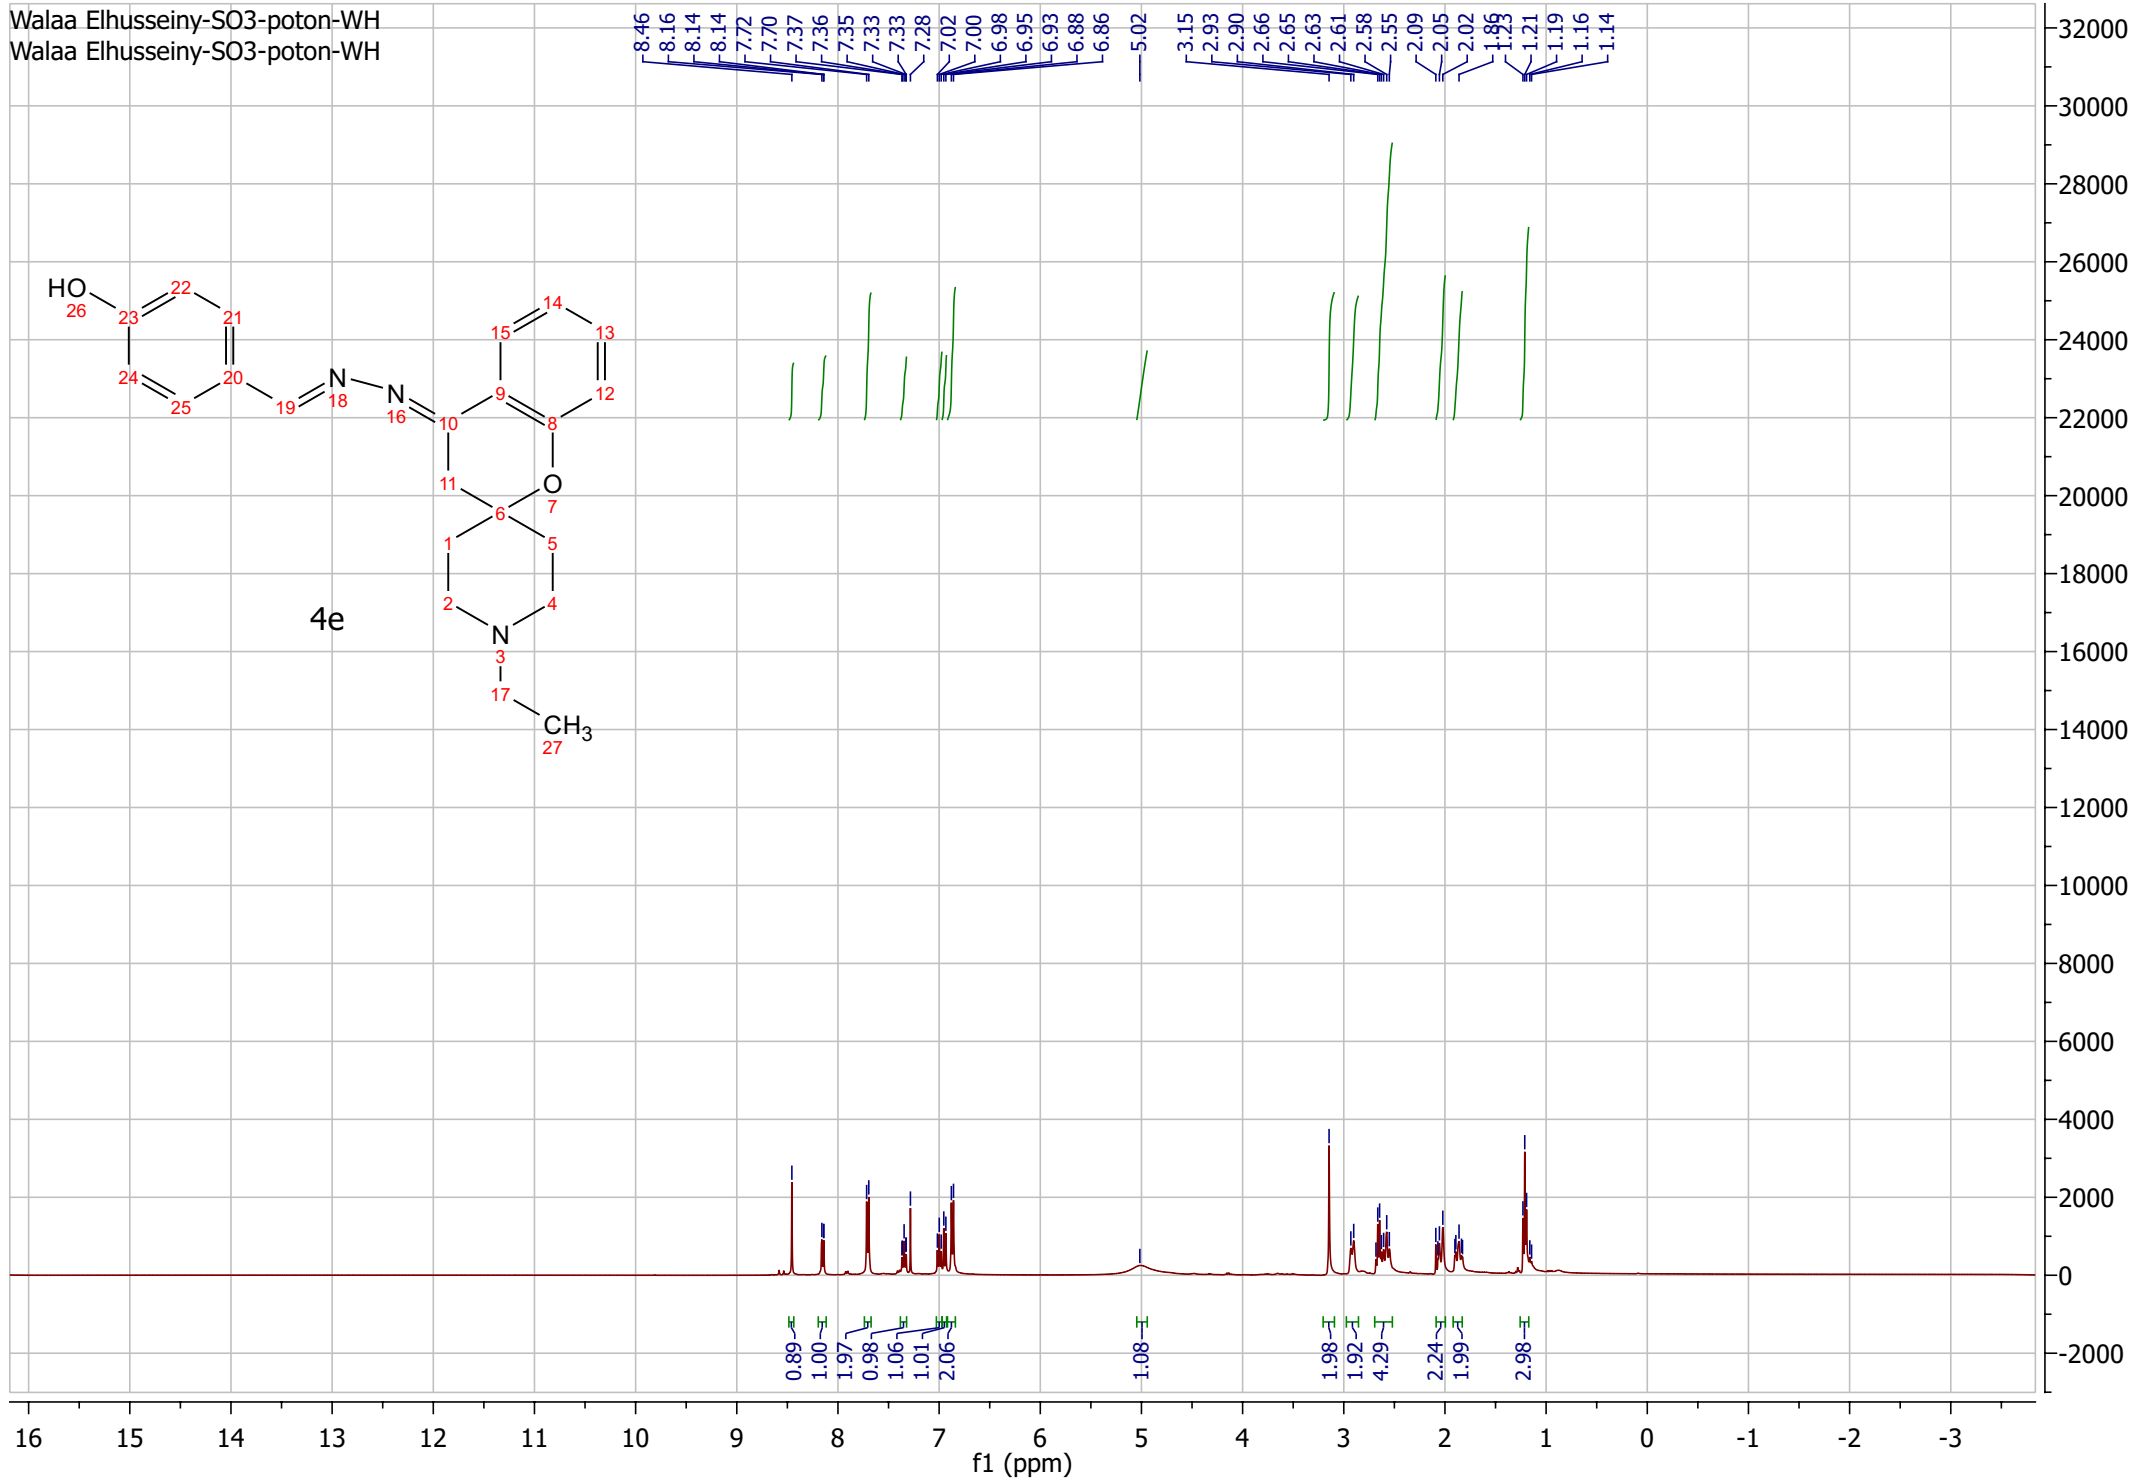

Abdelrahman Hamdy-AH83-proton-WH  
Abdelrahman Hamdy-AH83-proton-WH

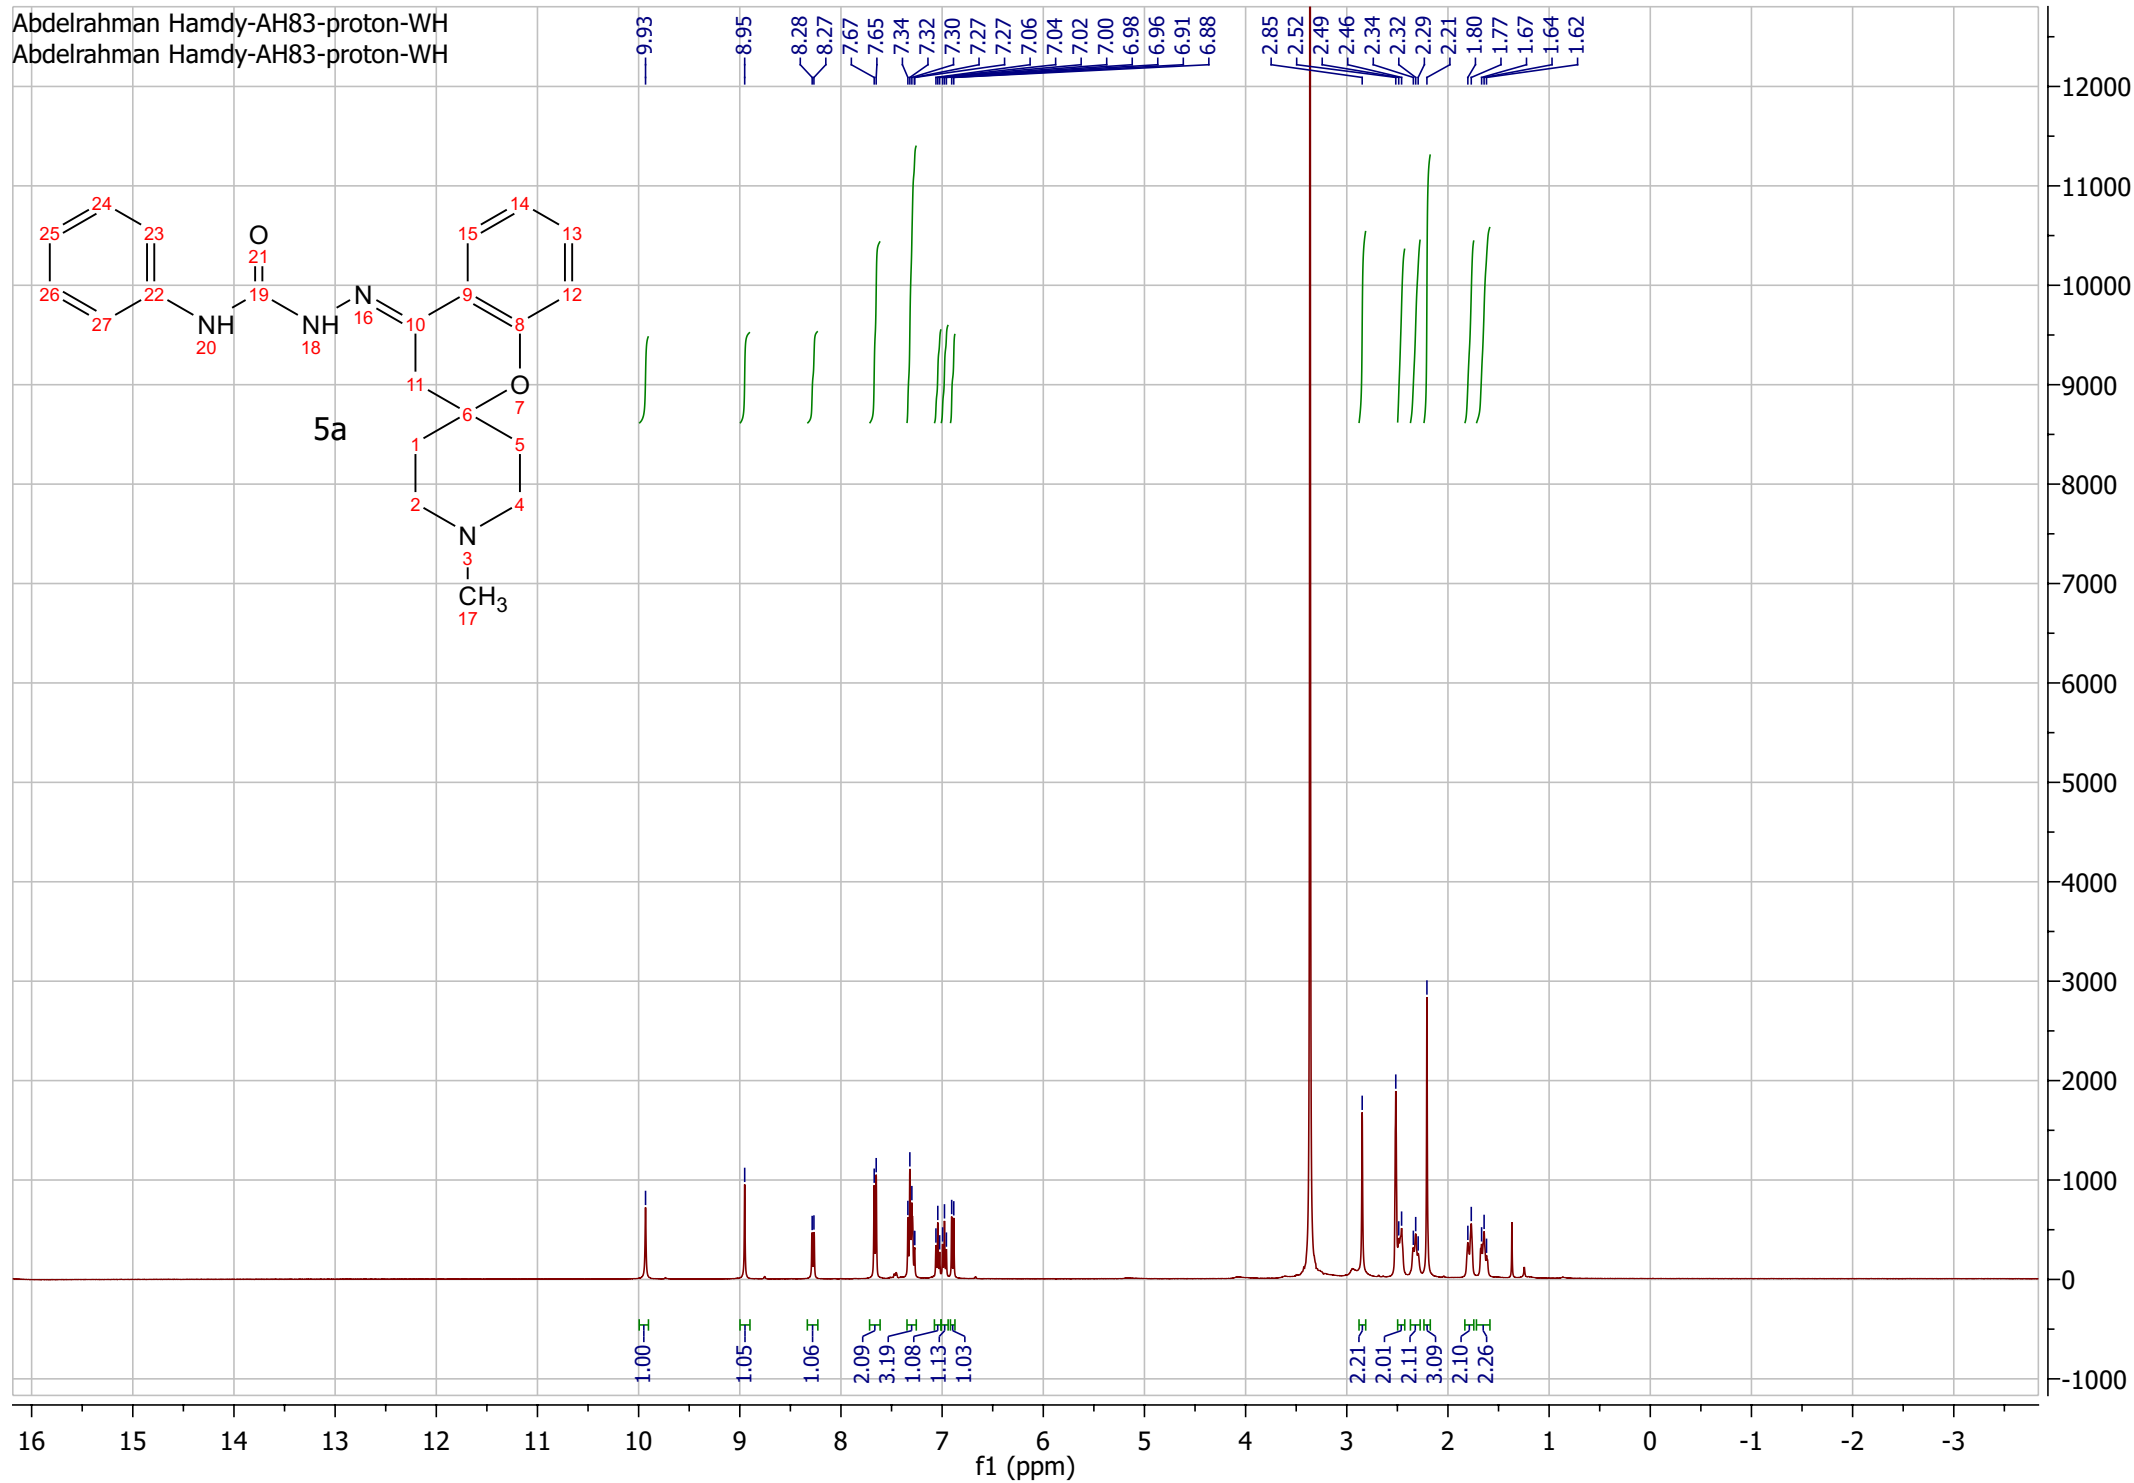



abdelrahman hamdy AH121 -M hnmr  
abdelrahman hamdy AH121 -M hnmr

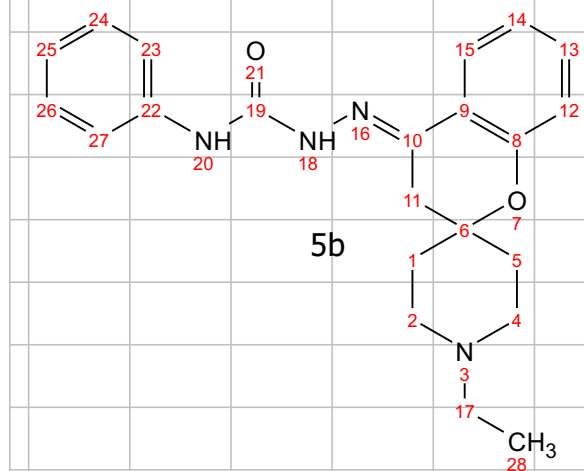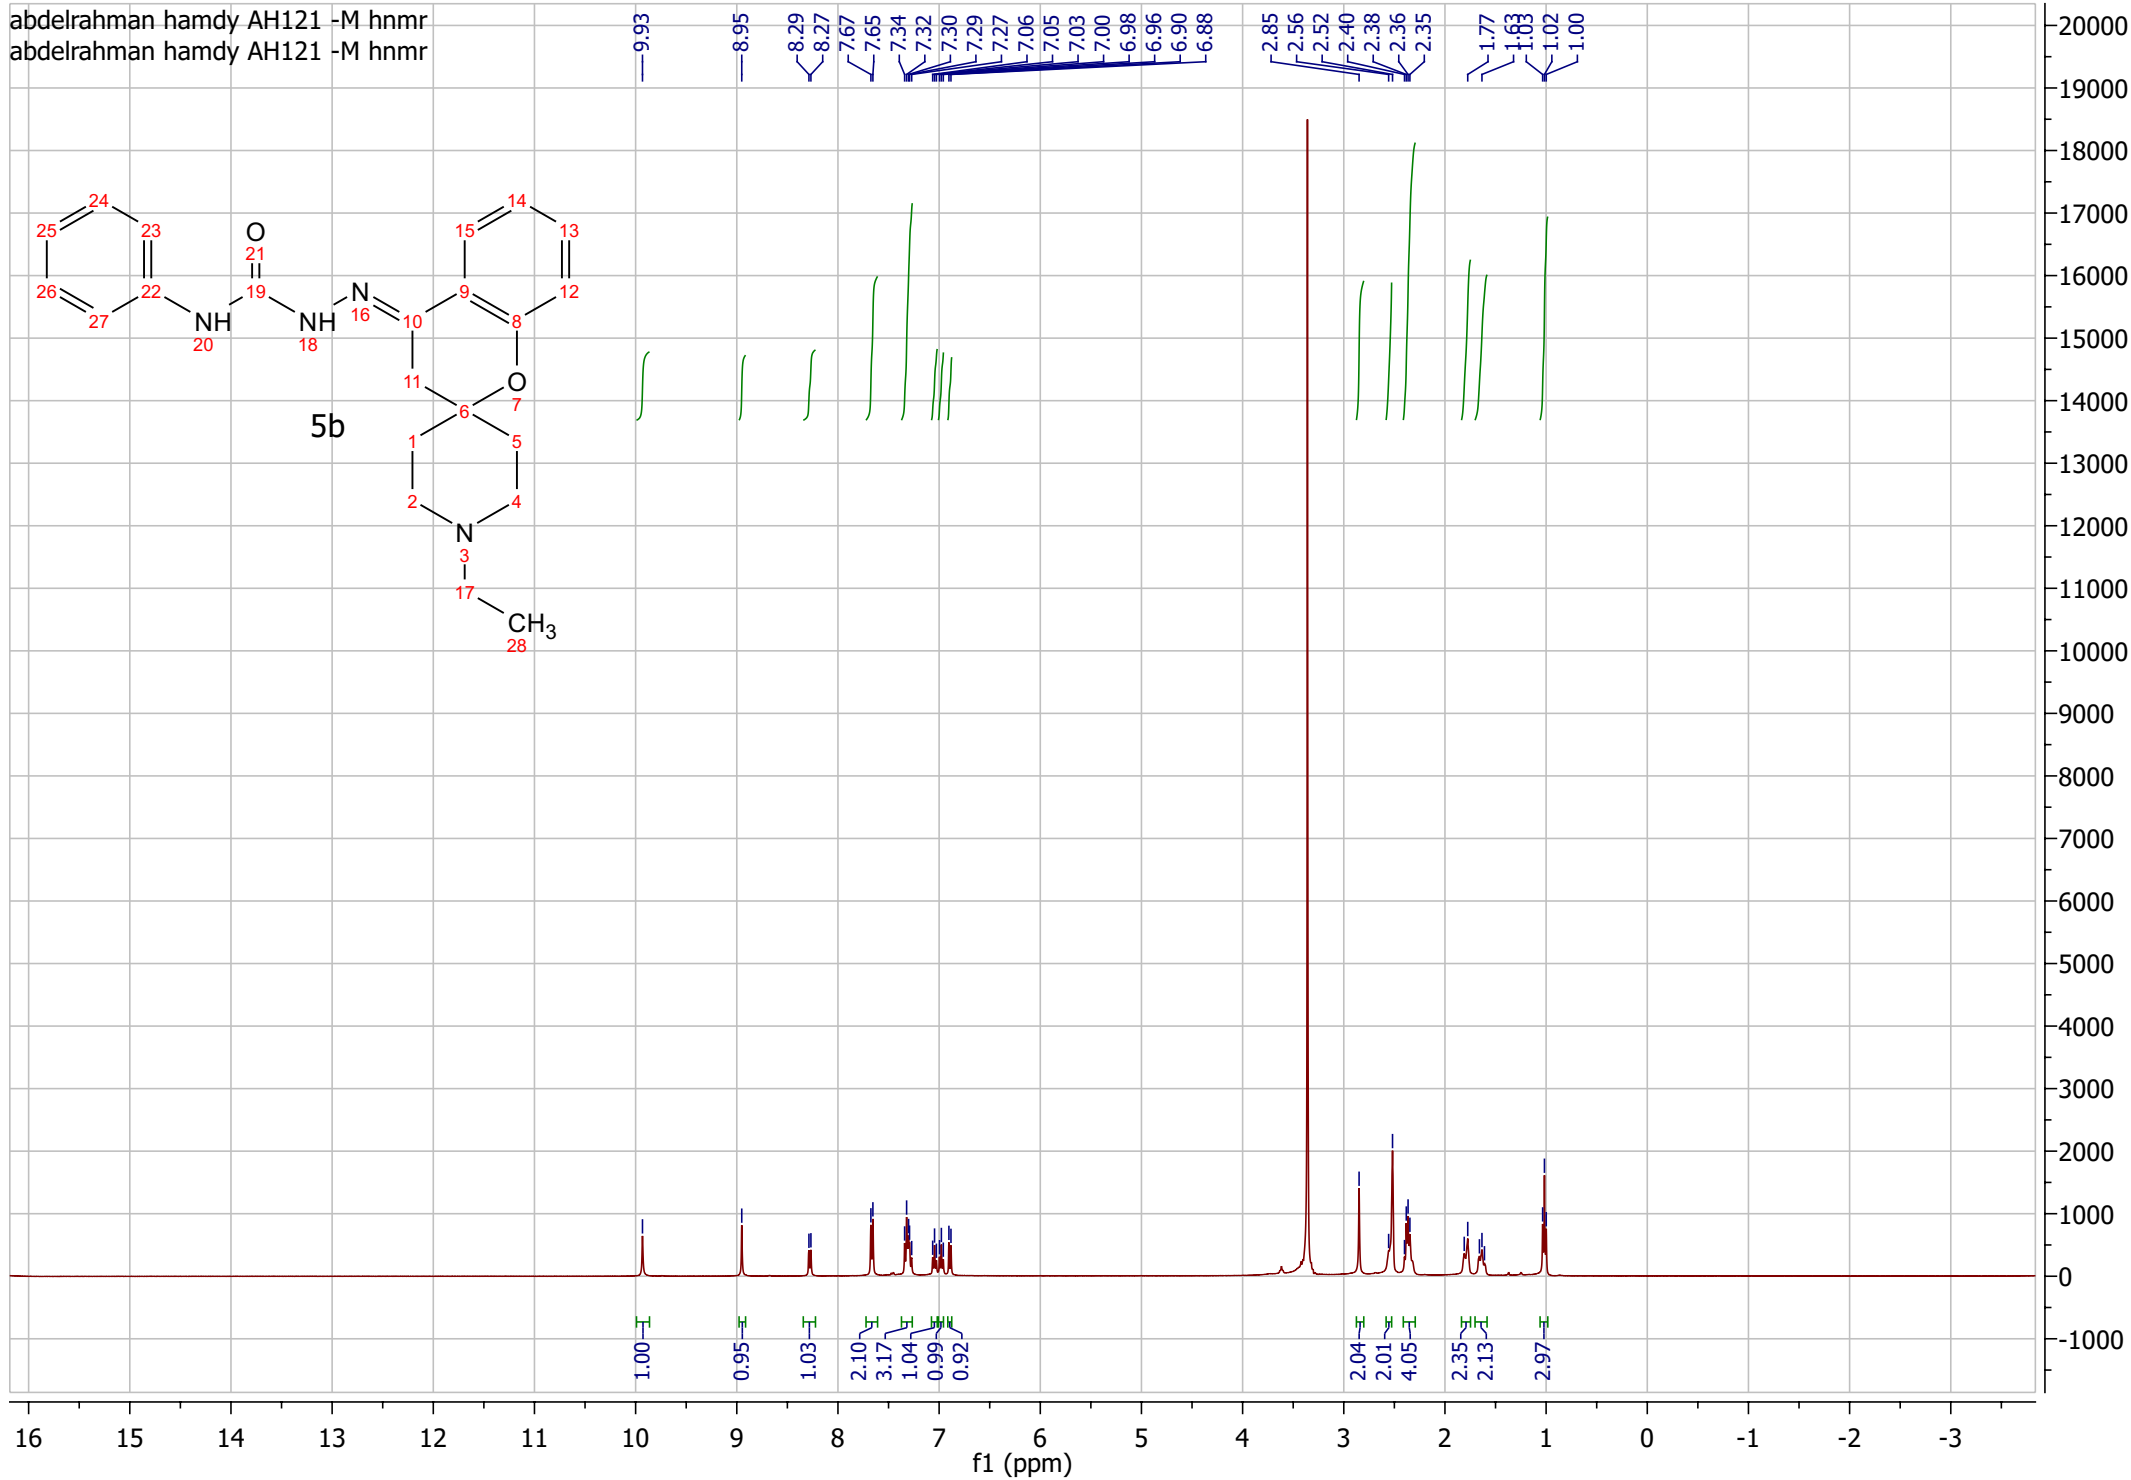

Abdelrahman Hamdy-AH82-proton-WH  
Abdelrahman Hamdy-AH82-proton-WH

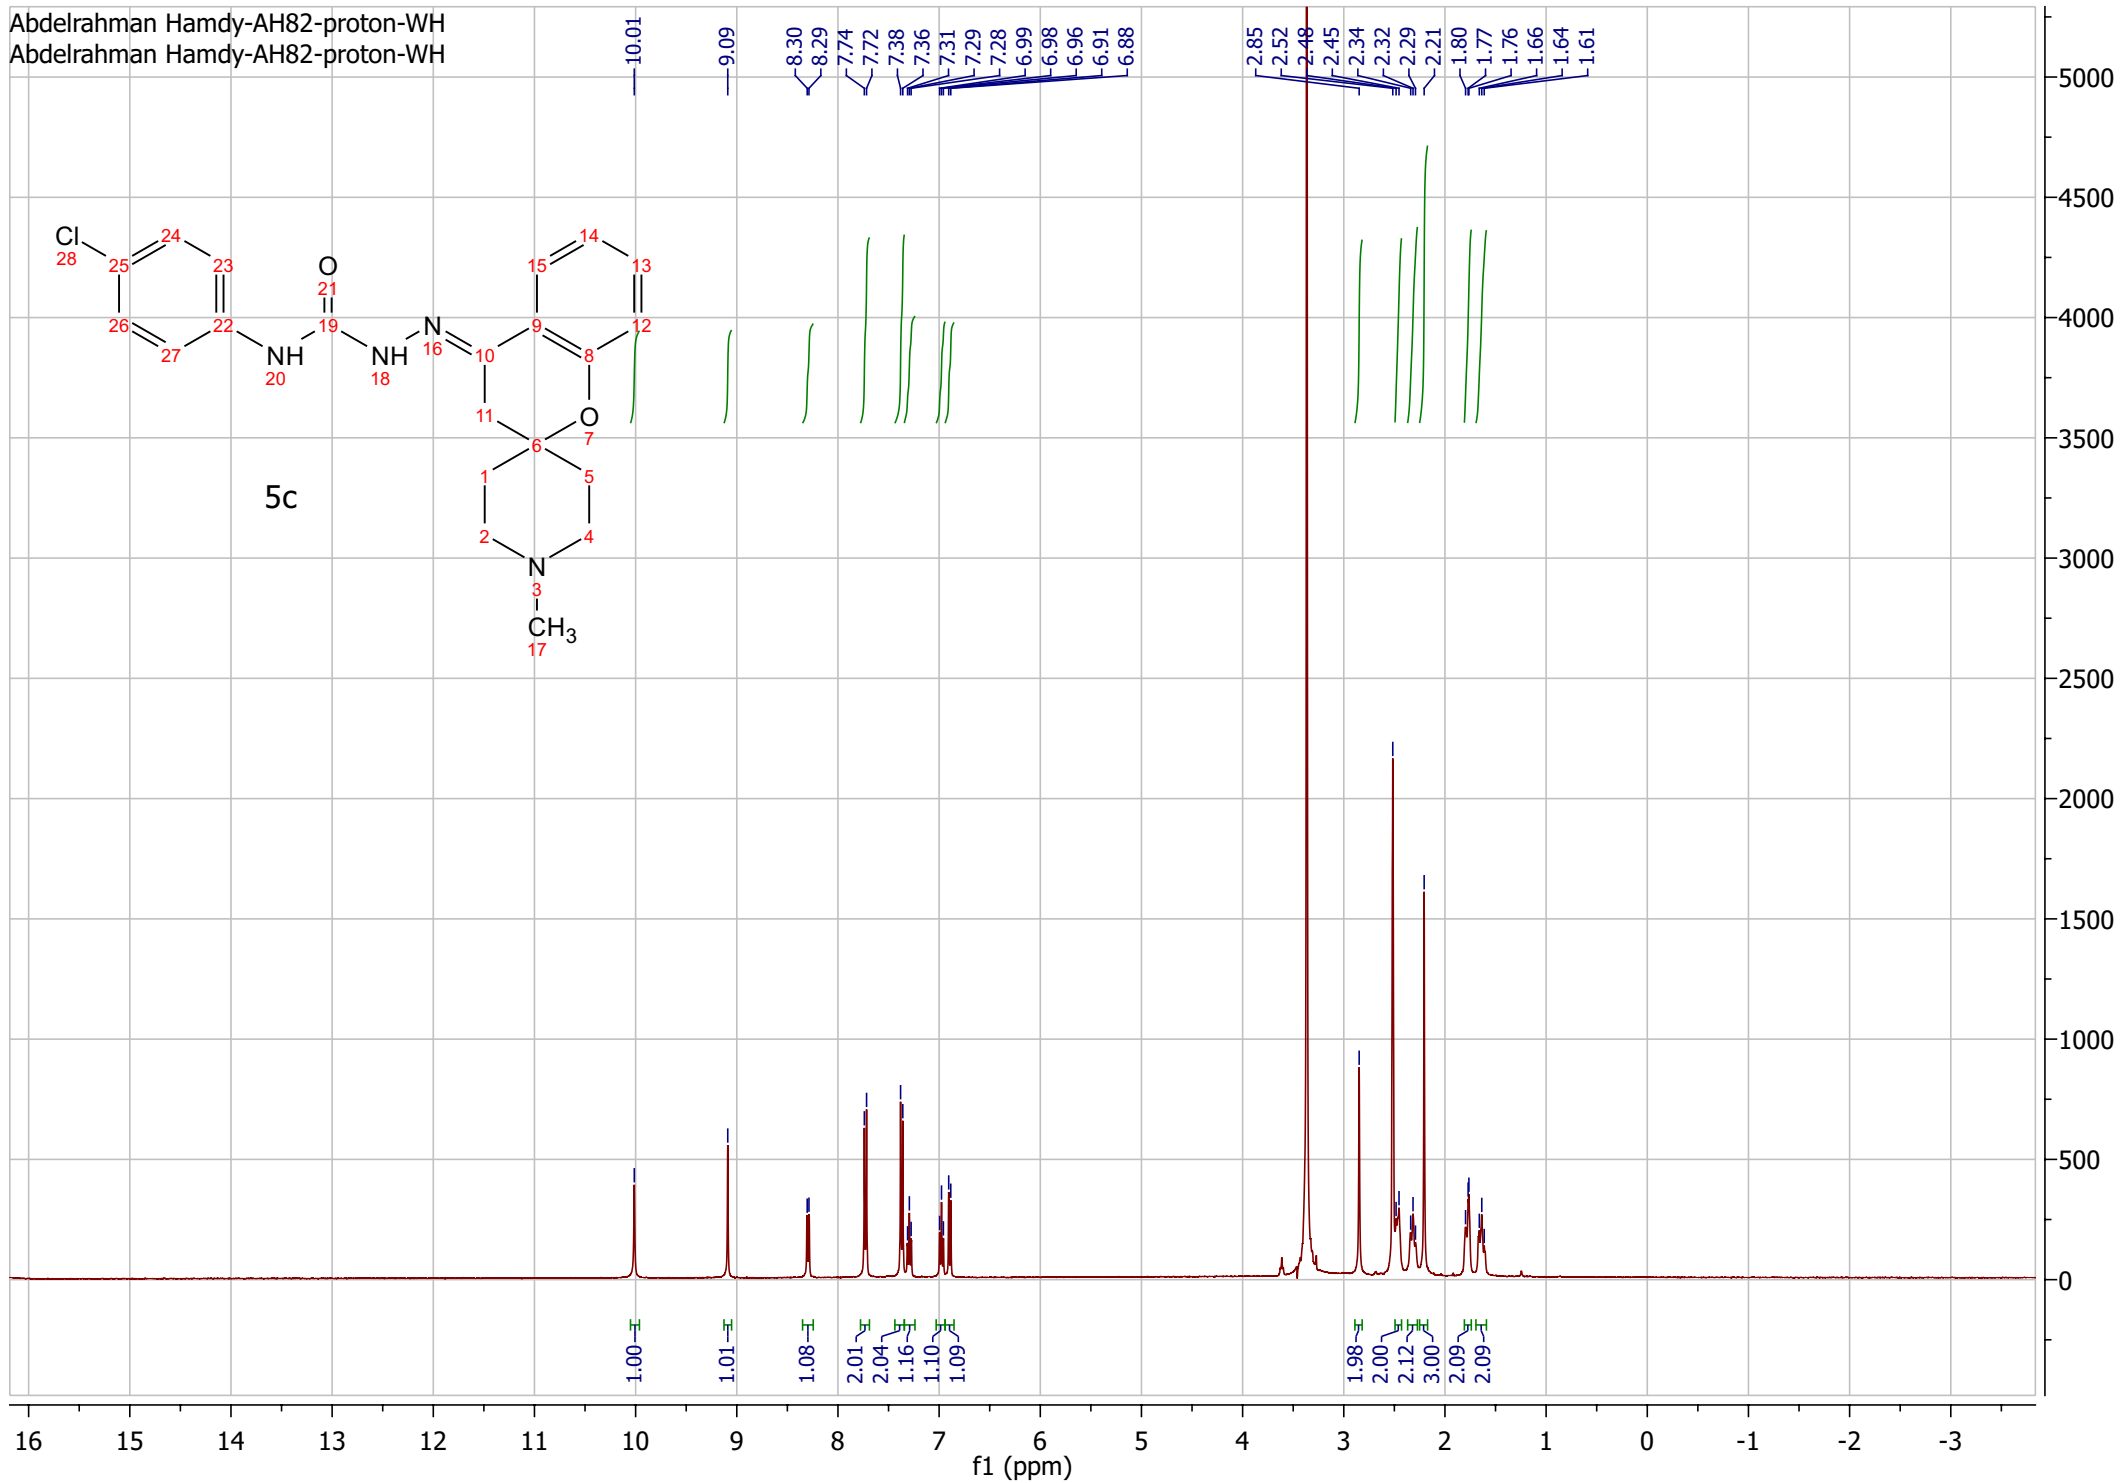

Abdelrahman Hamdy-AH84-proton-WH  
Abdelrahman Hamdy-AH84-proton-WH

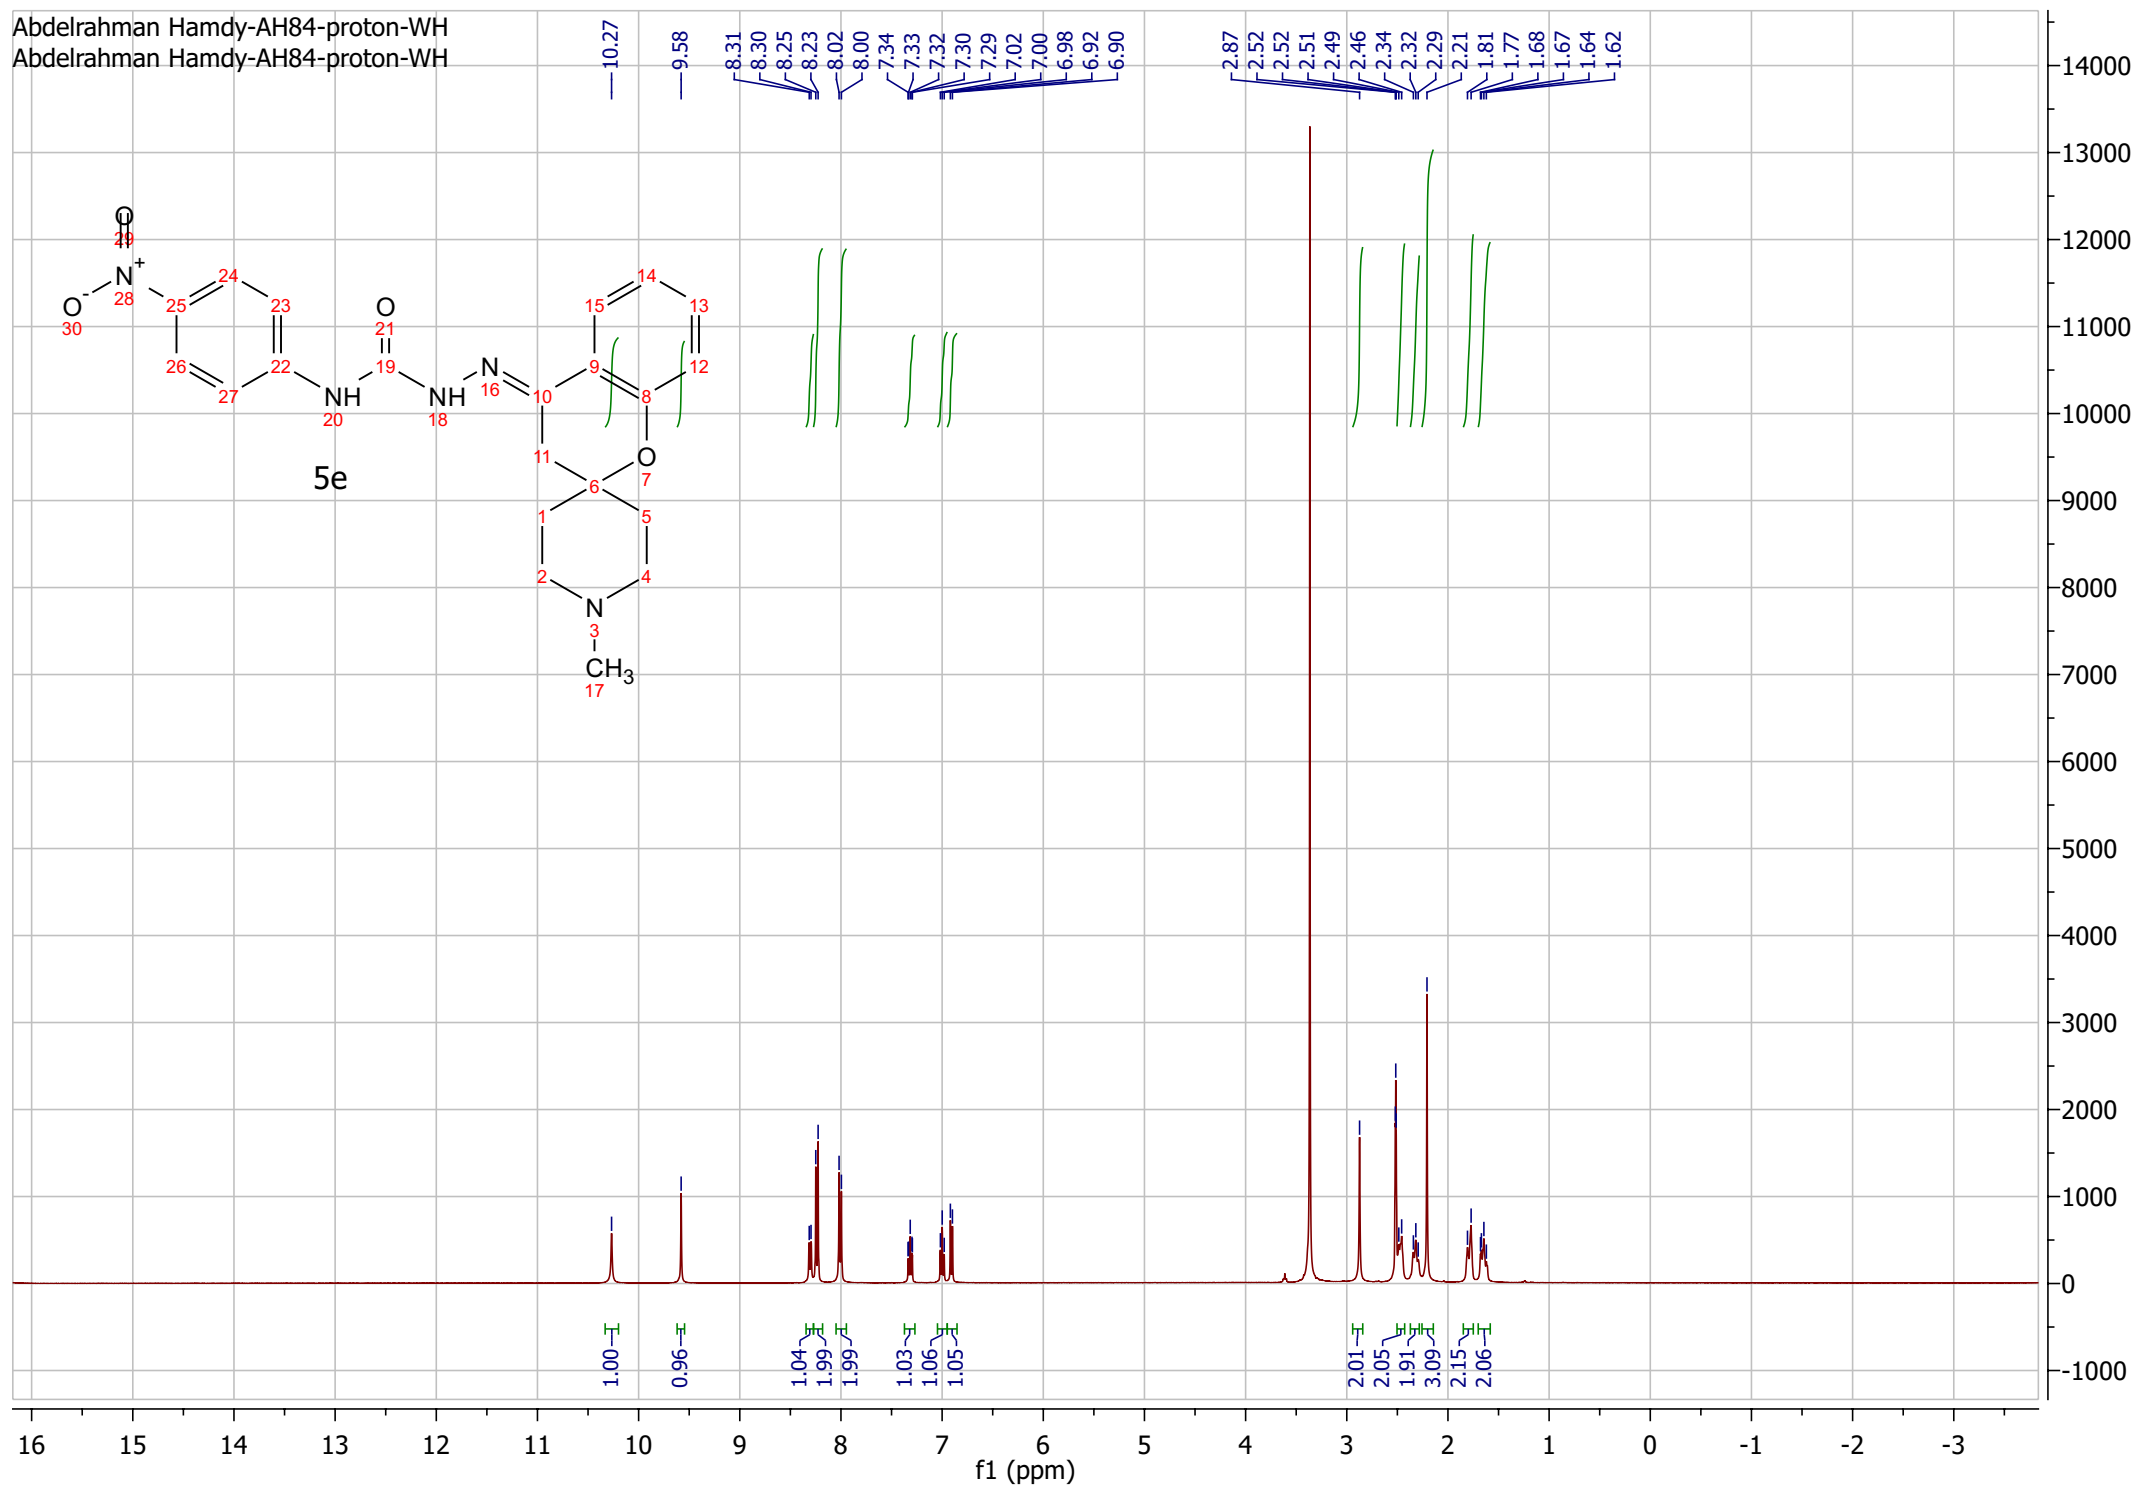

Abdelrahman hamdy-AH91-proton-WH  
Abdelrahman hamdy-AH91-proton-WH

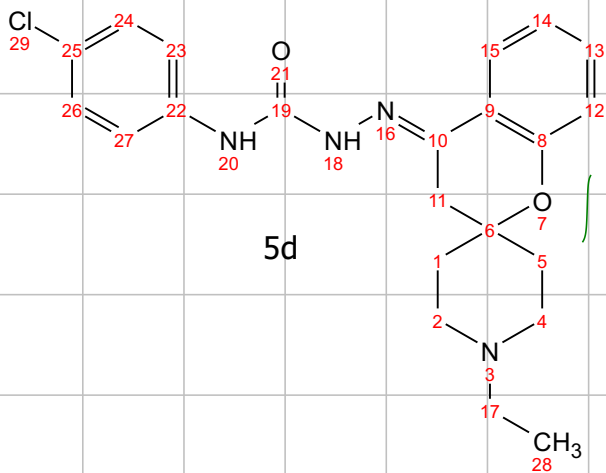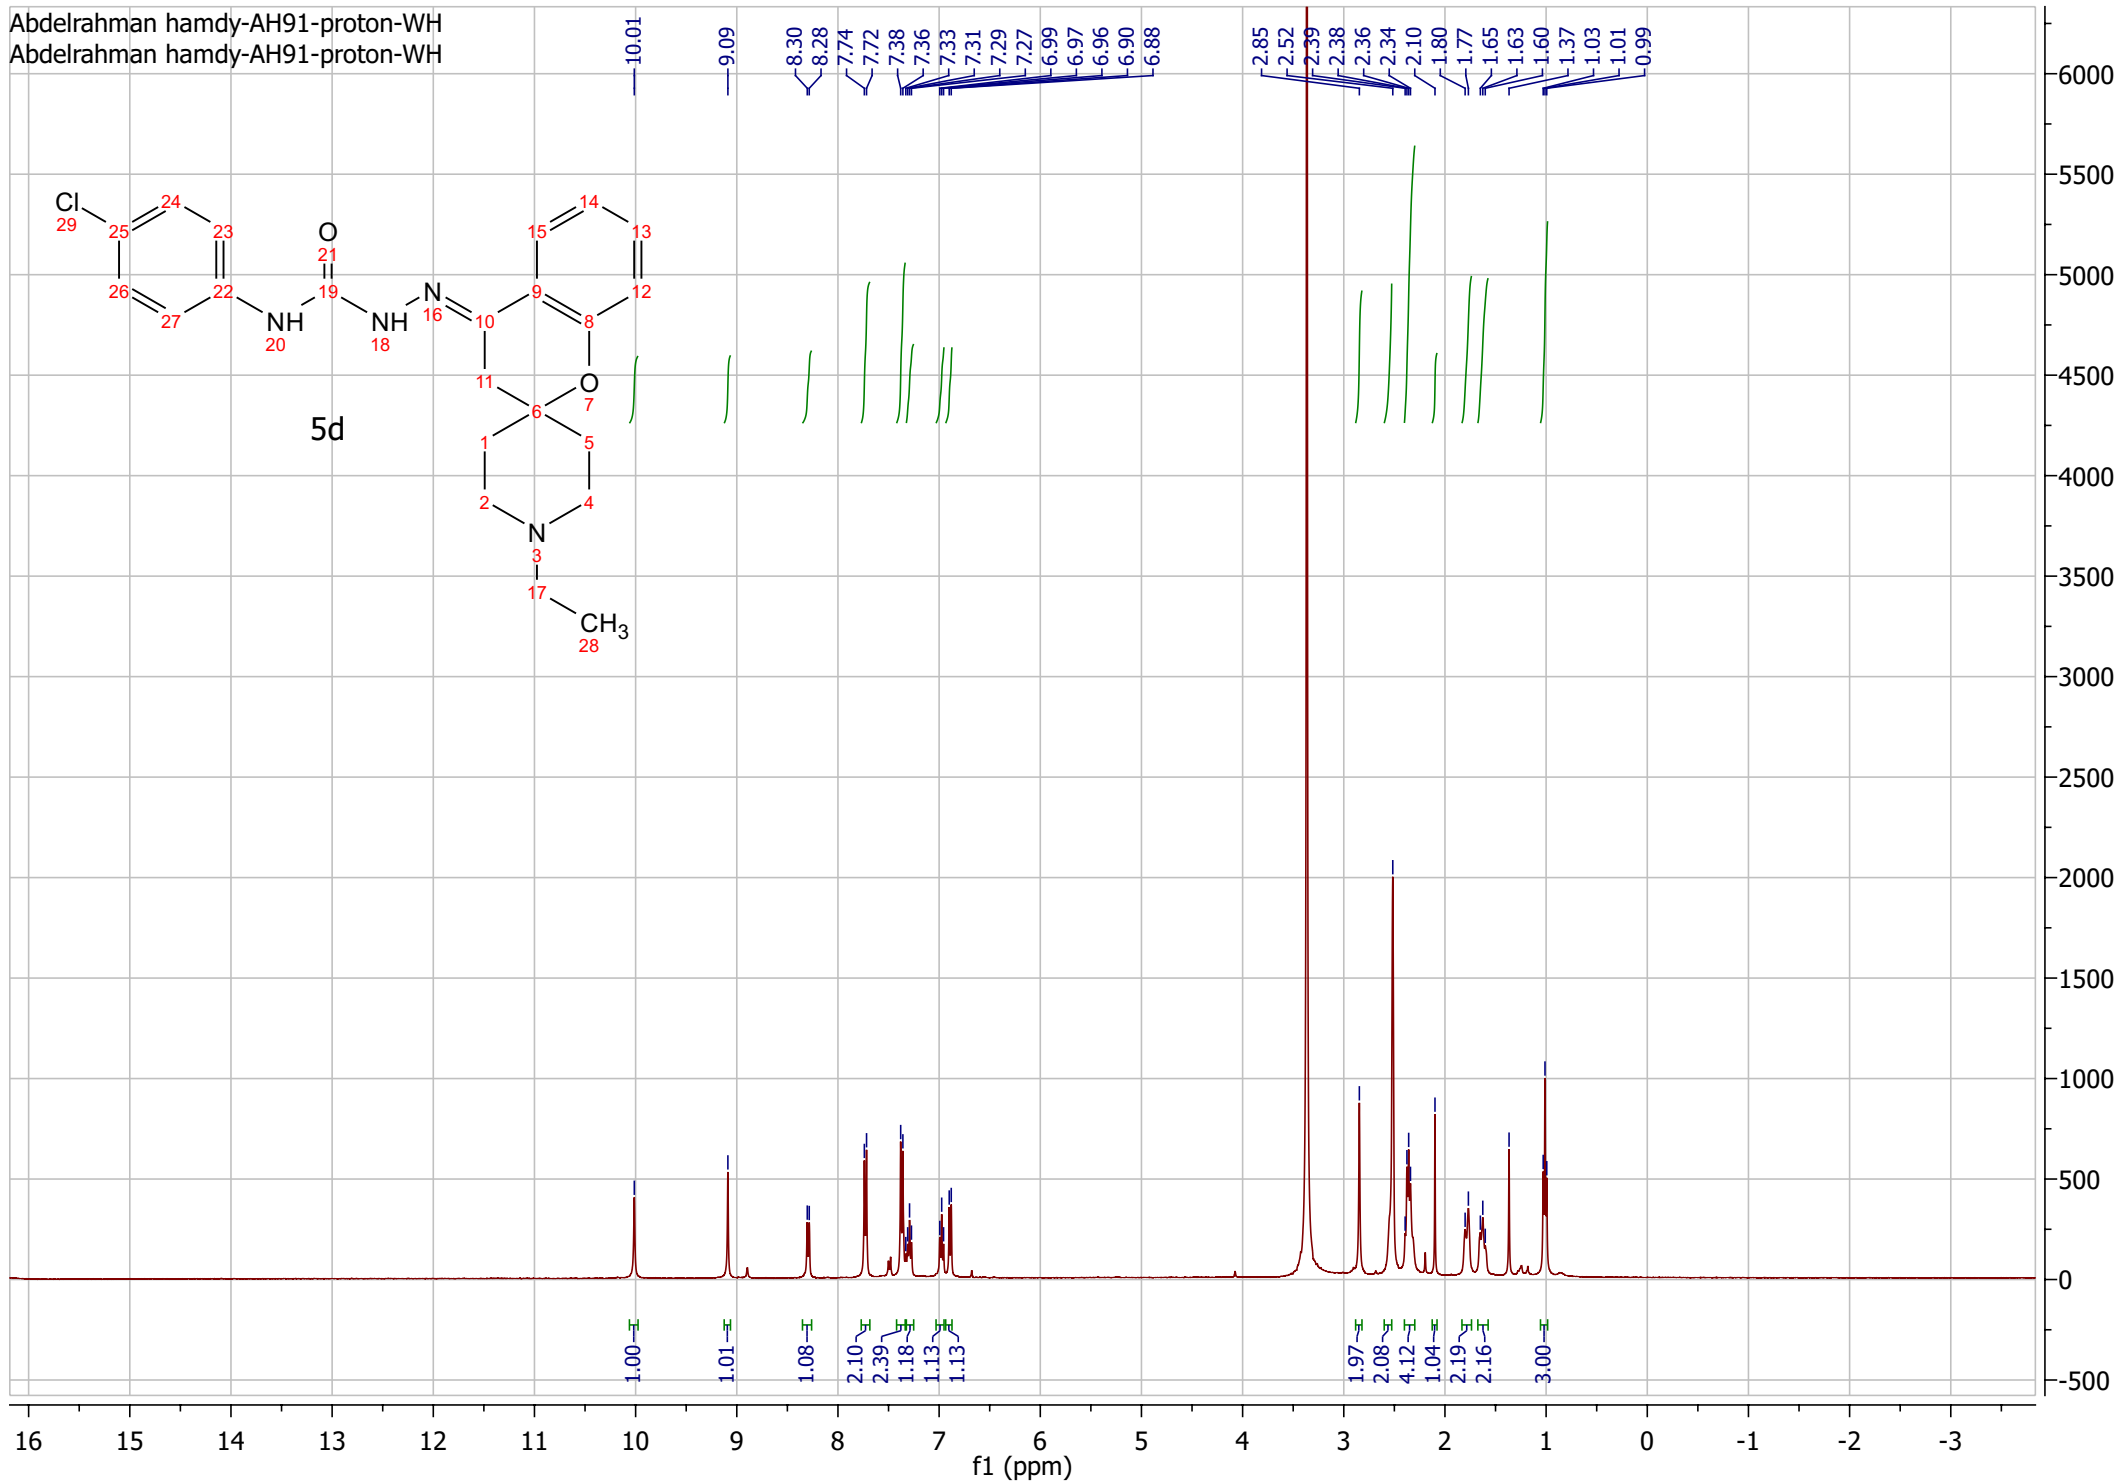

Abdelrahman hamdy-AH92-proton-WH  
Abdelrahman hamdy-AH92-proton-WH

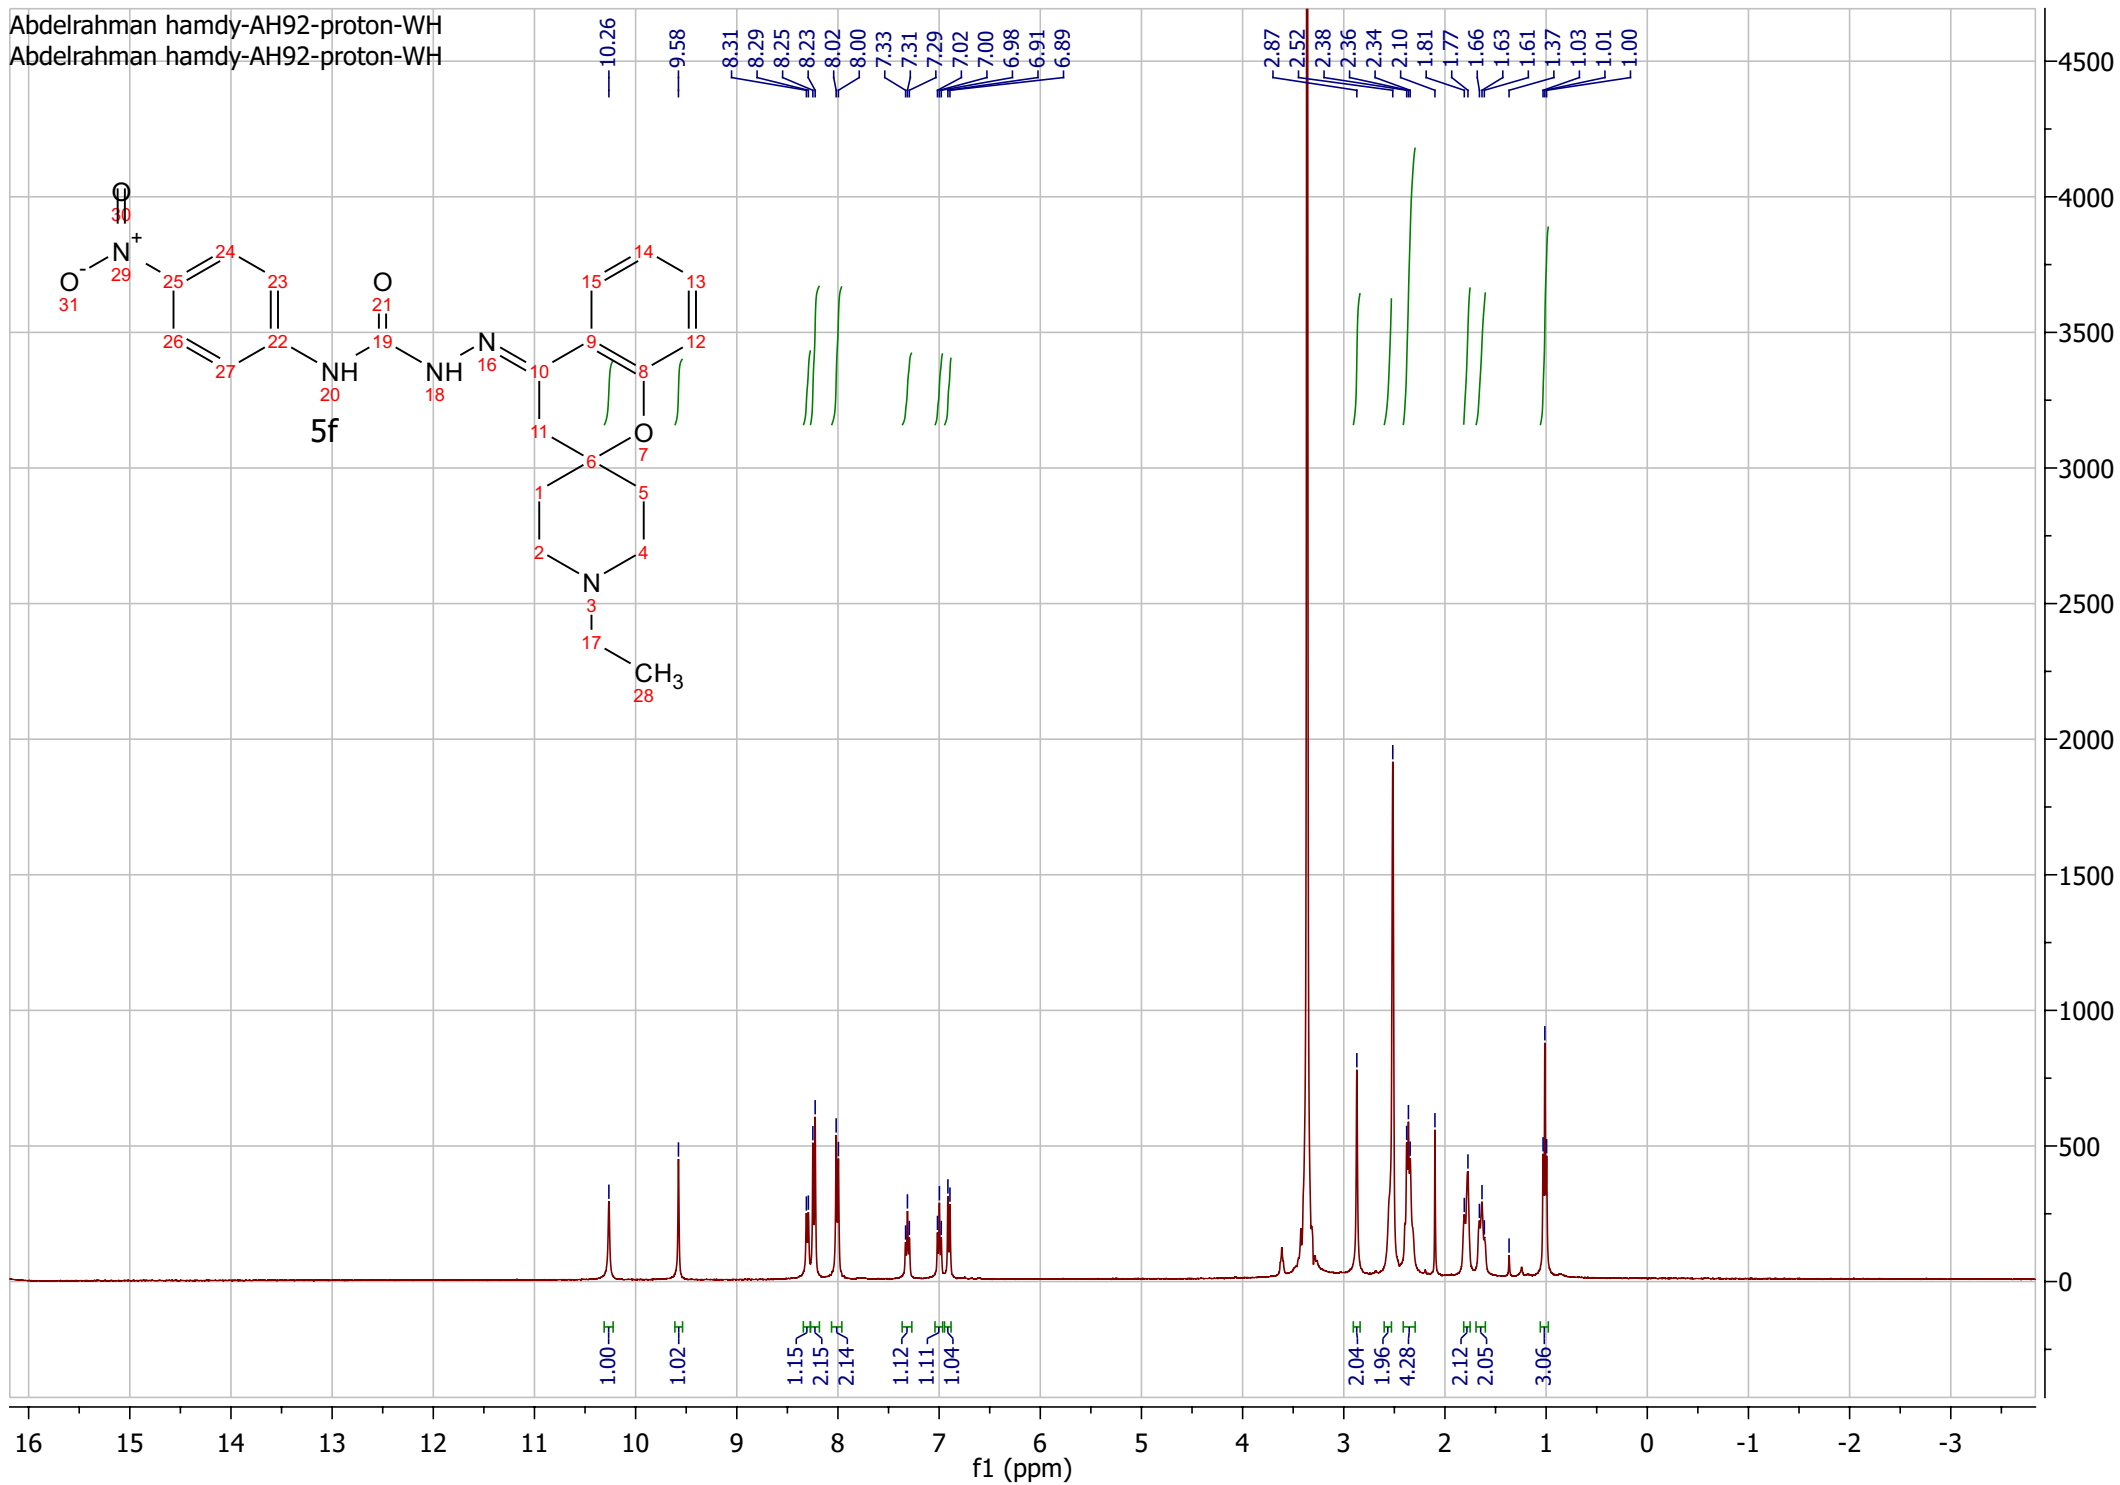

Dina osman-N-CH3 tolyl-CNO-HNMR-DMSO-AF  
Dina osman-N-CH3 tolyl-CNO-HNMR-DMSO-AF

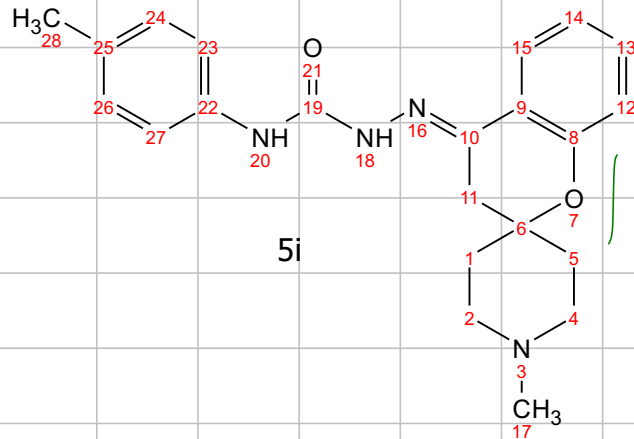

5i

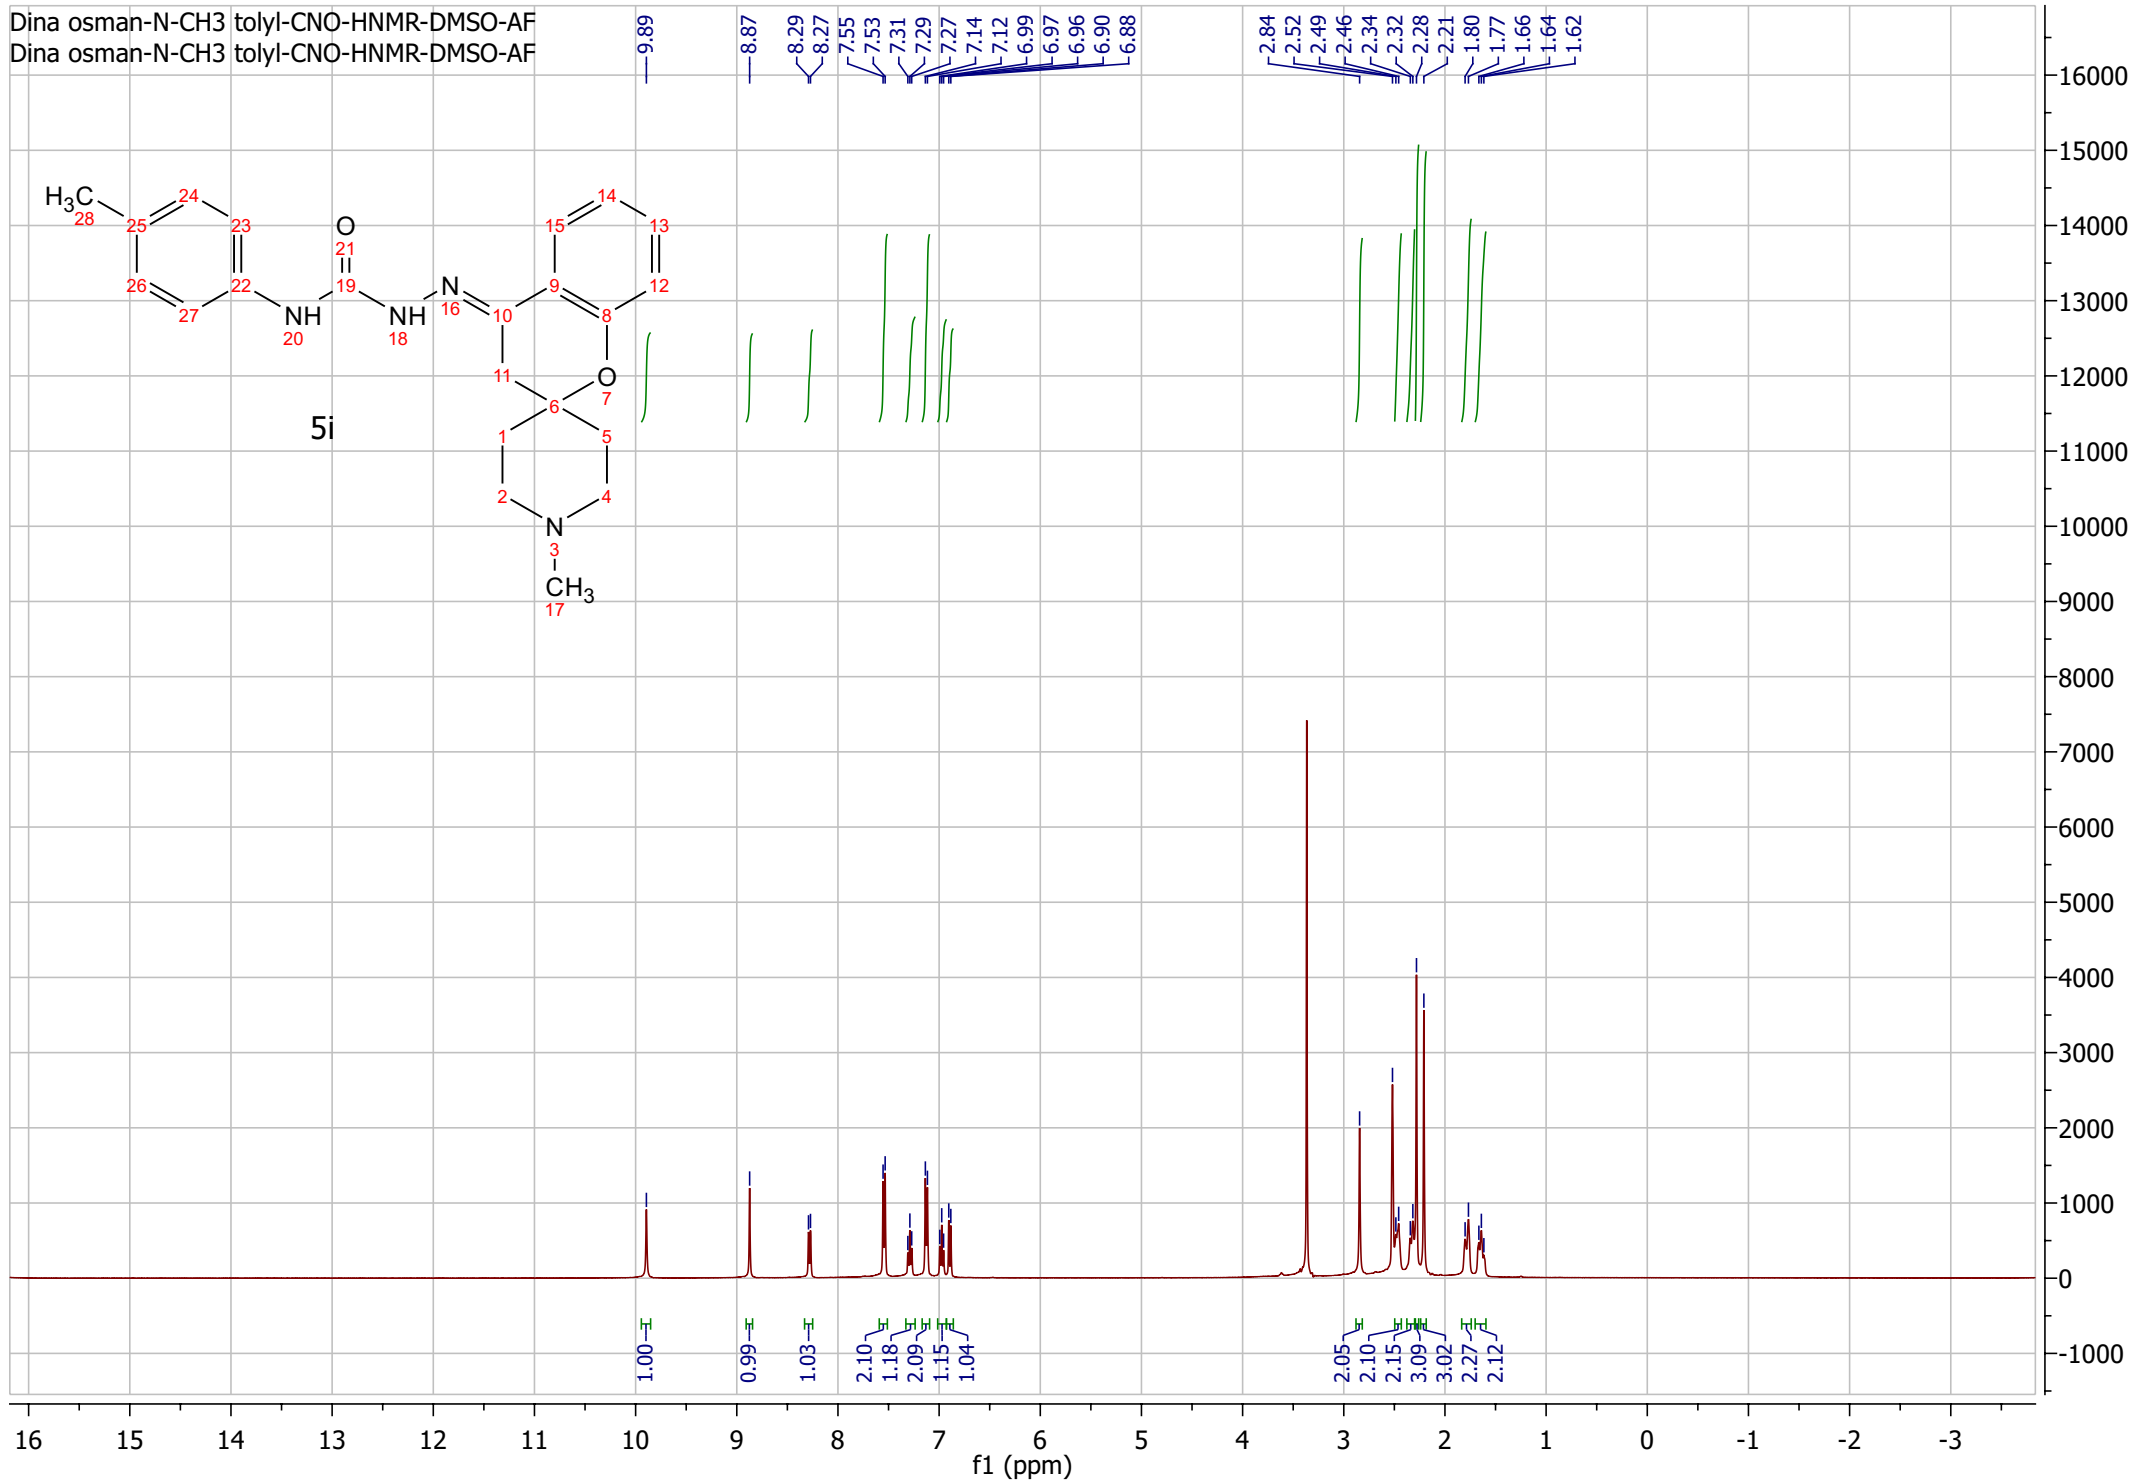

Dina osman-N-C2H5-methoxy-CNO-HNMR-DMSO-AF  
Dina osman-N-C2H5-methoxy-CNO-HNMR-DMSO-AF

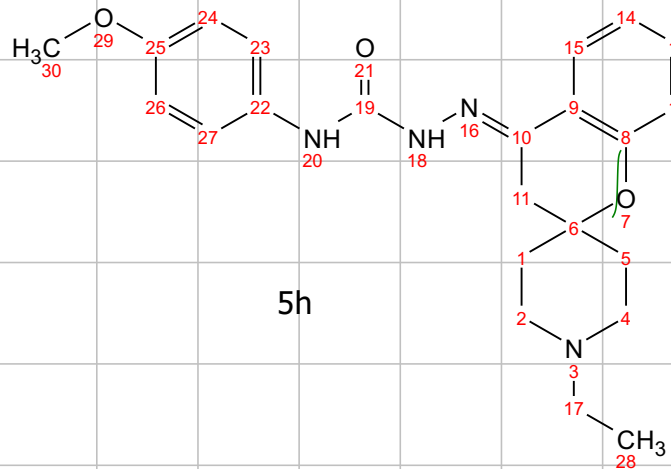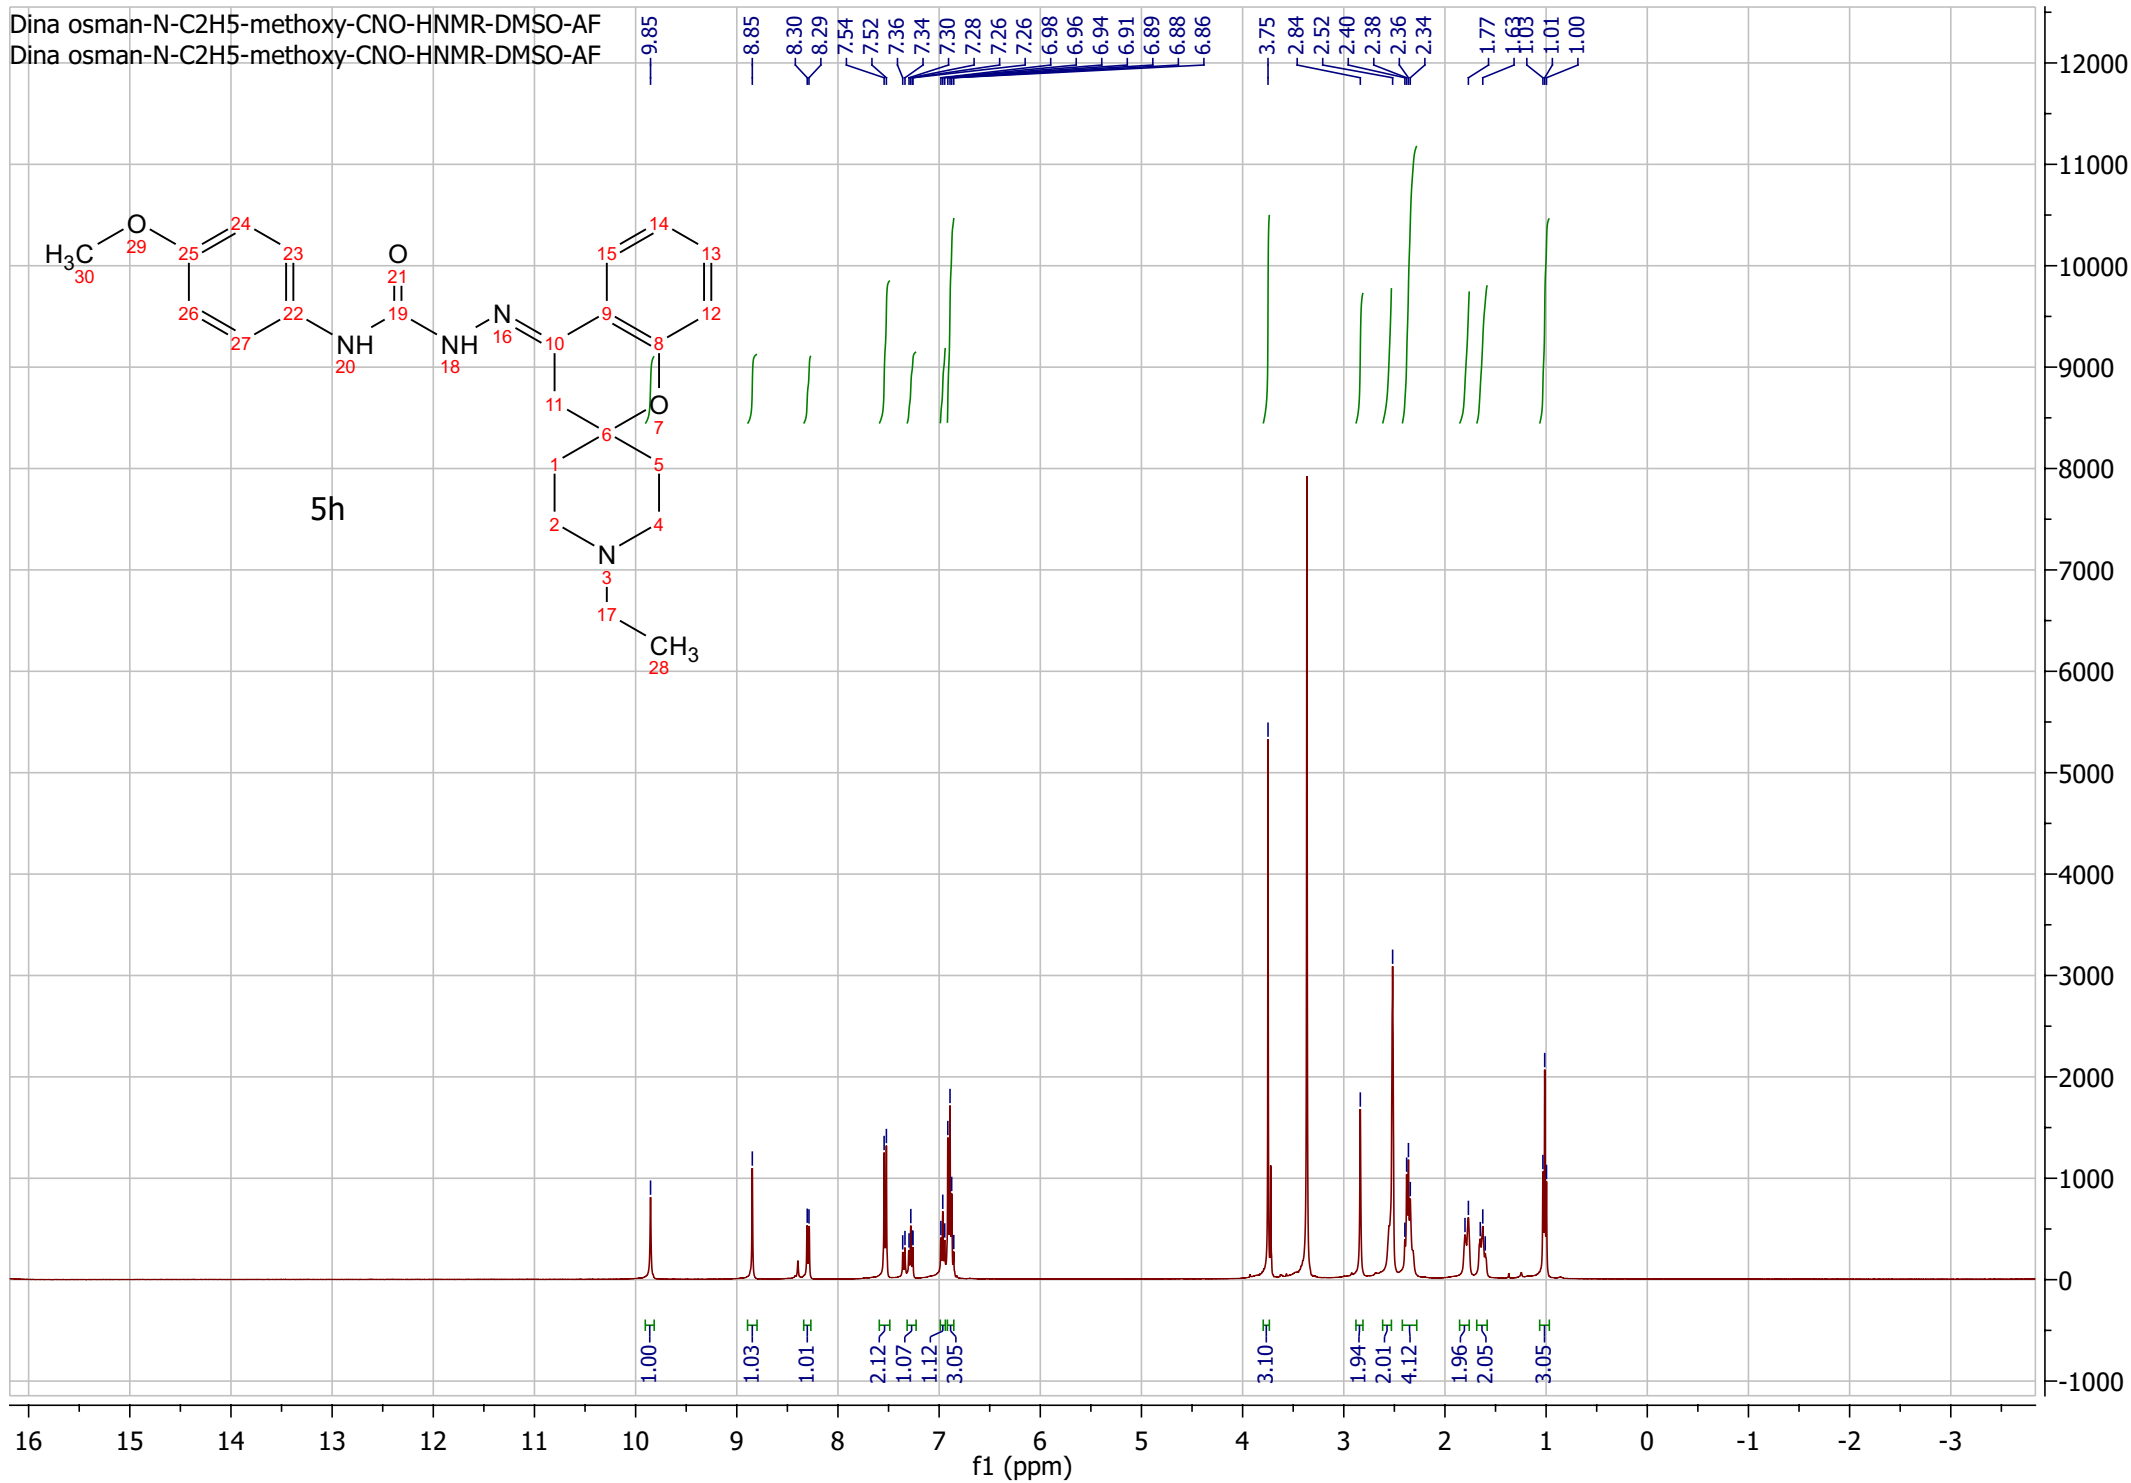

Dina osman-N-CH3-methoxy-CNO-HNMR-DMSO-AF  
Dina osman-N-CH3-methoxy-CNO-HNMR-DMSO-AF

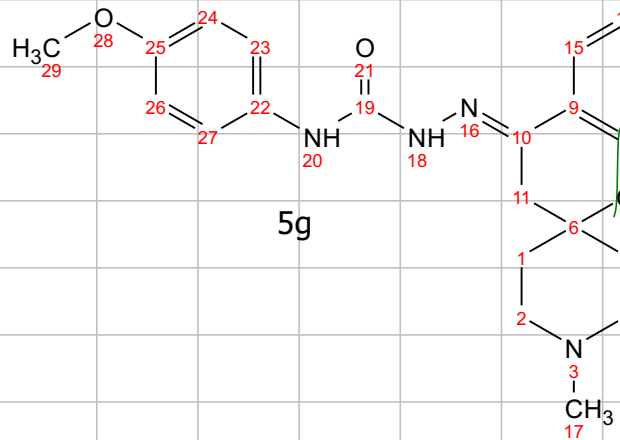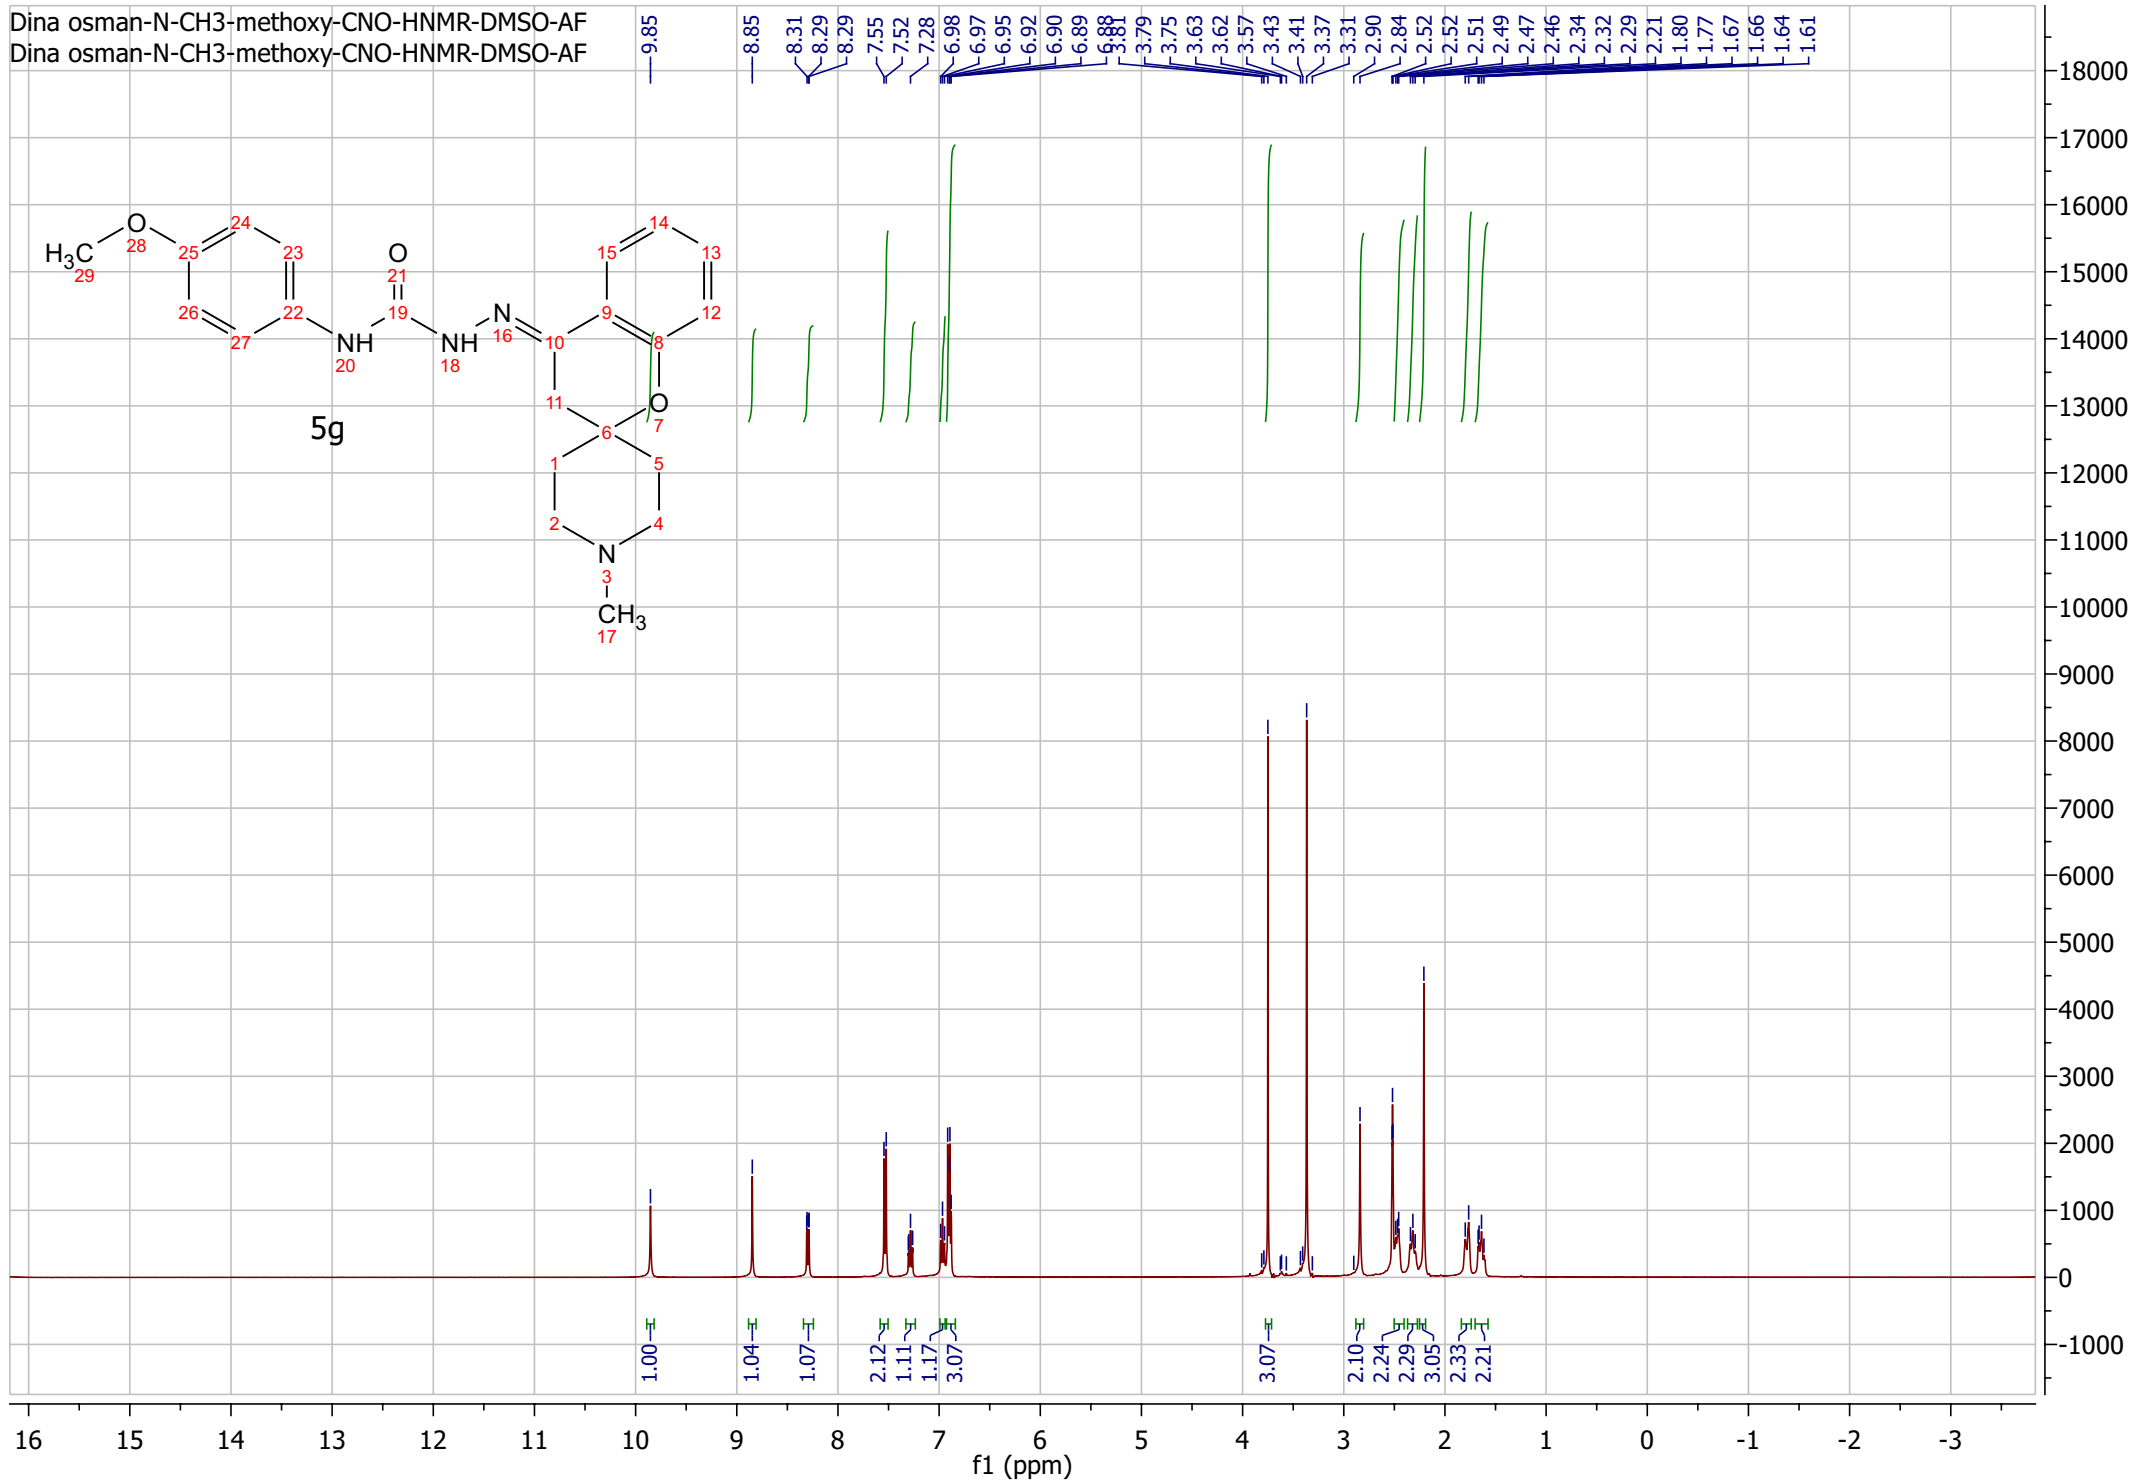



Dina osman-N-ethyl tolyl-methoxy-CNO-HNMR-DMSO-A  
Dina osman-N-ethyl tolyl-methoxy-CNO-HNMR-DMSO-A

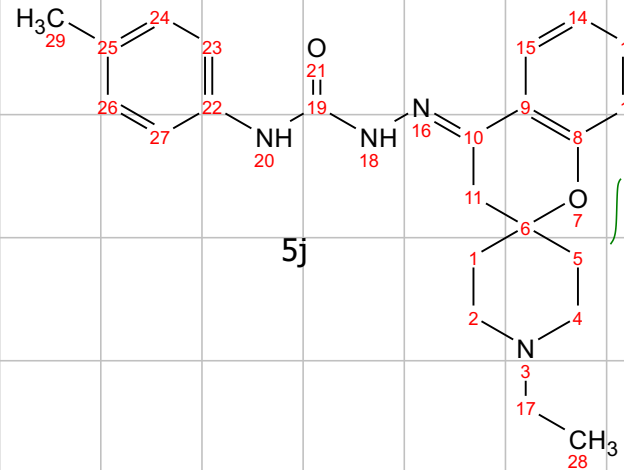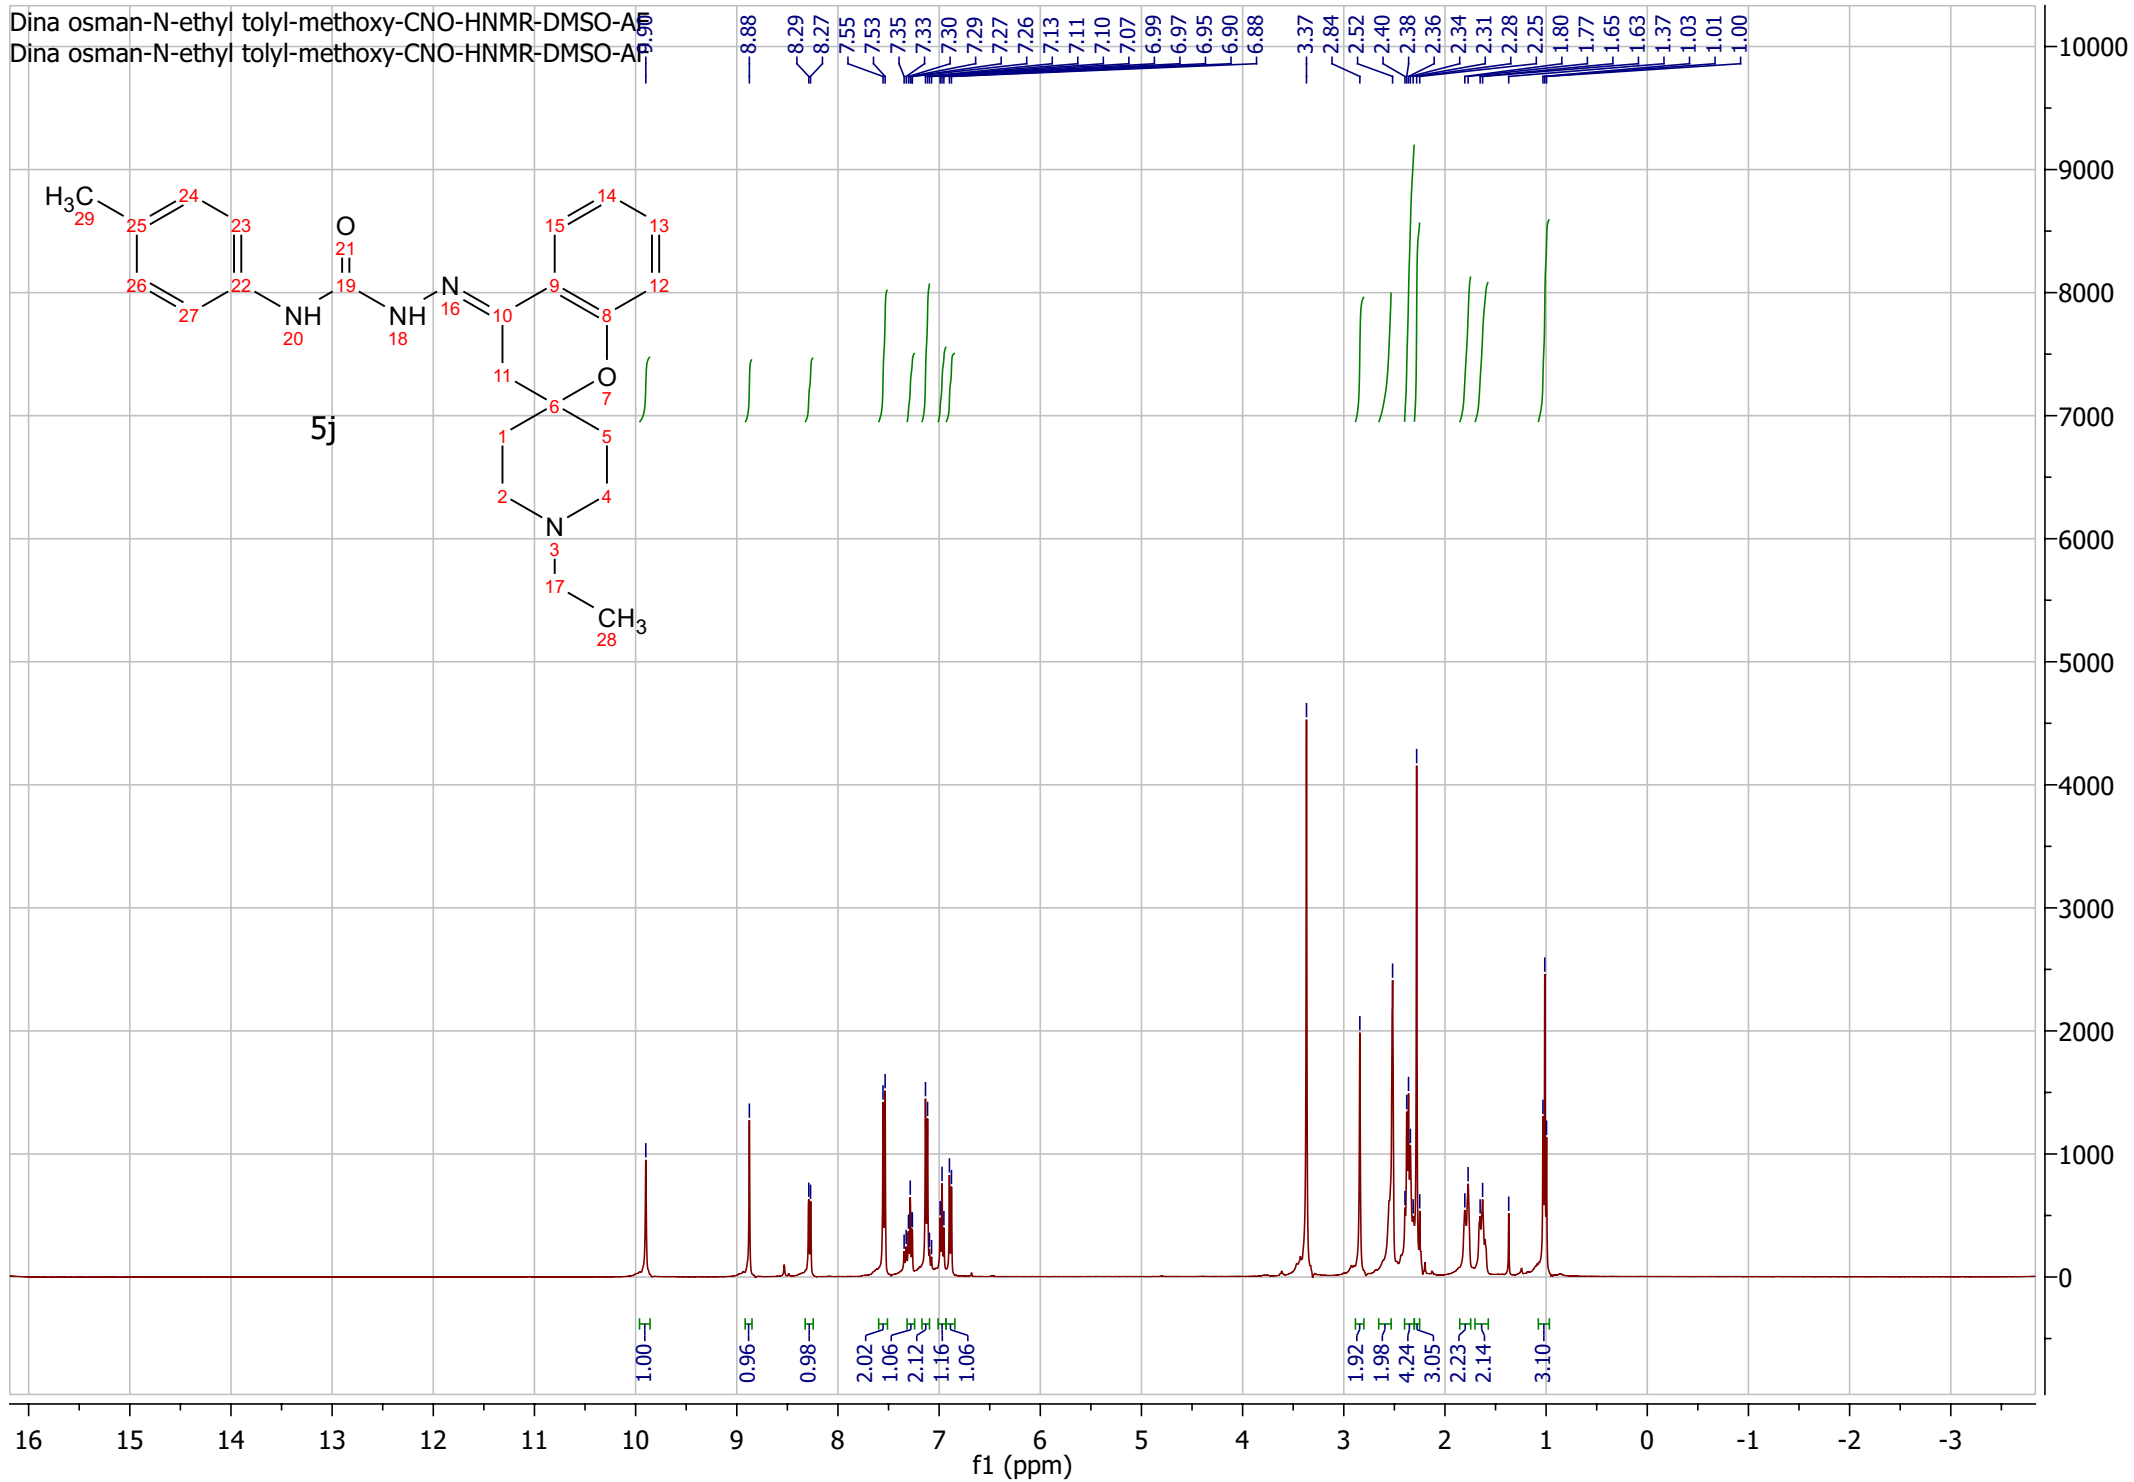

Dina othman-N-ch3-nh2-APT-SA  
Dina othman-N-ch3-nh2-APT-SA

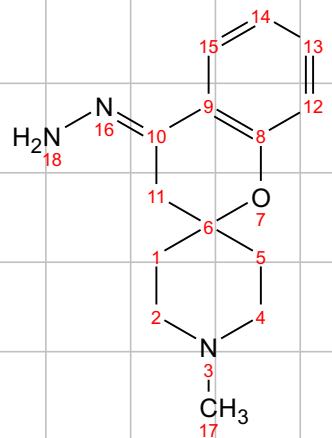

3a

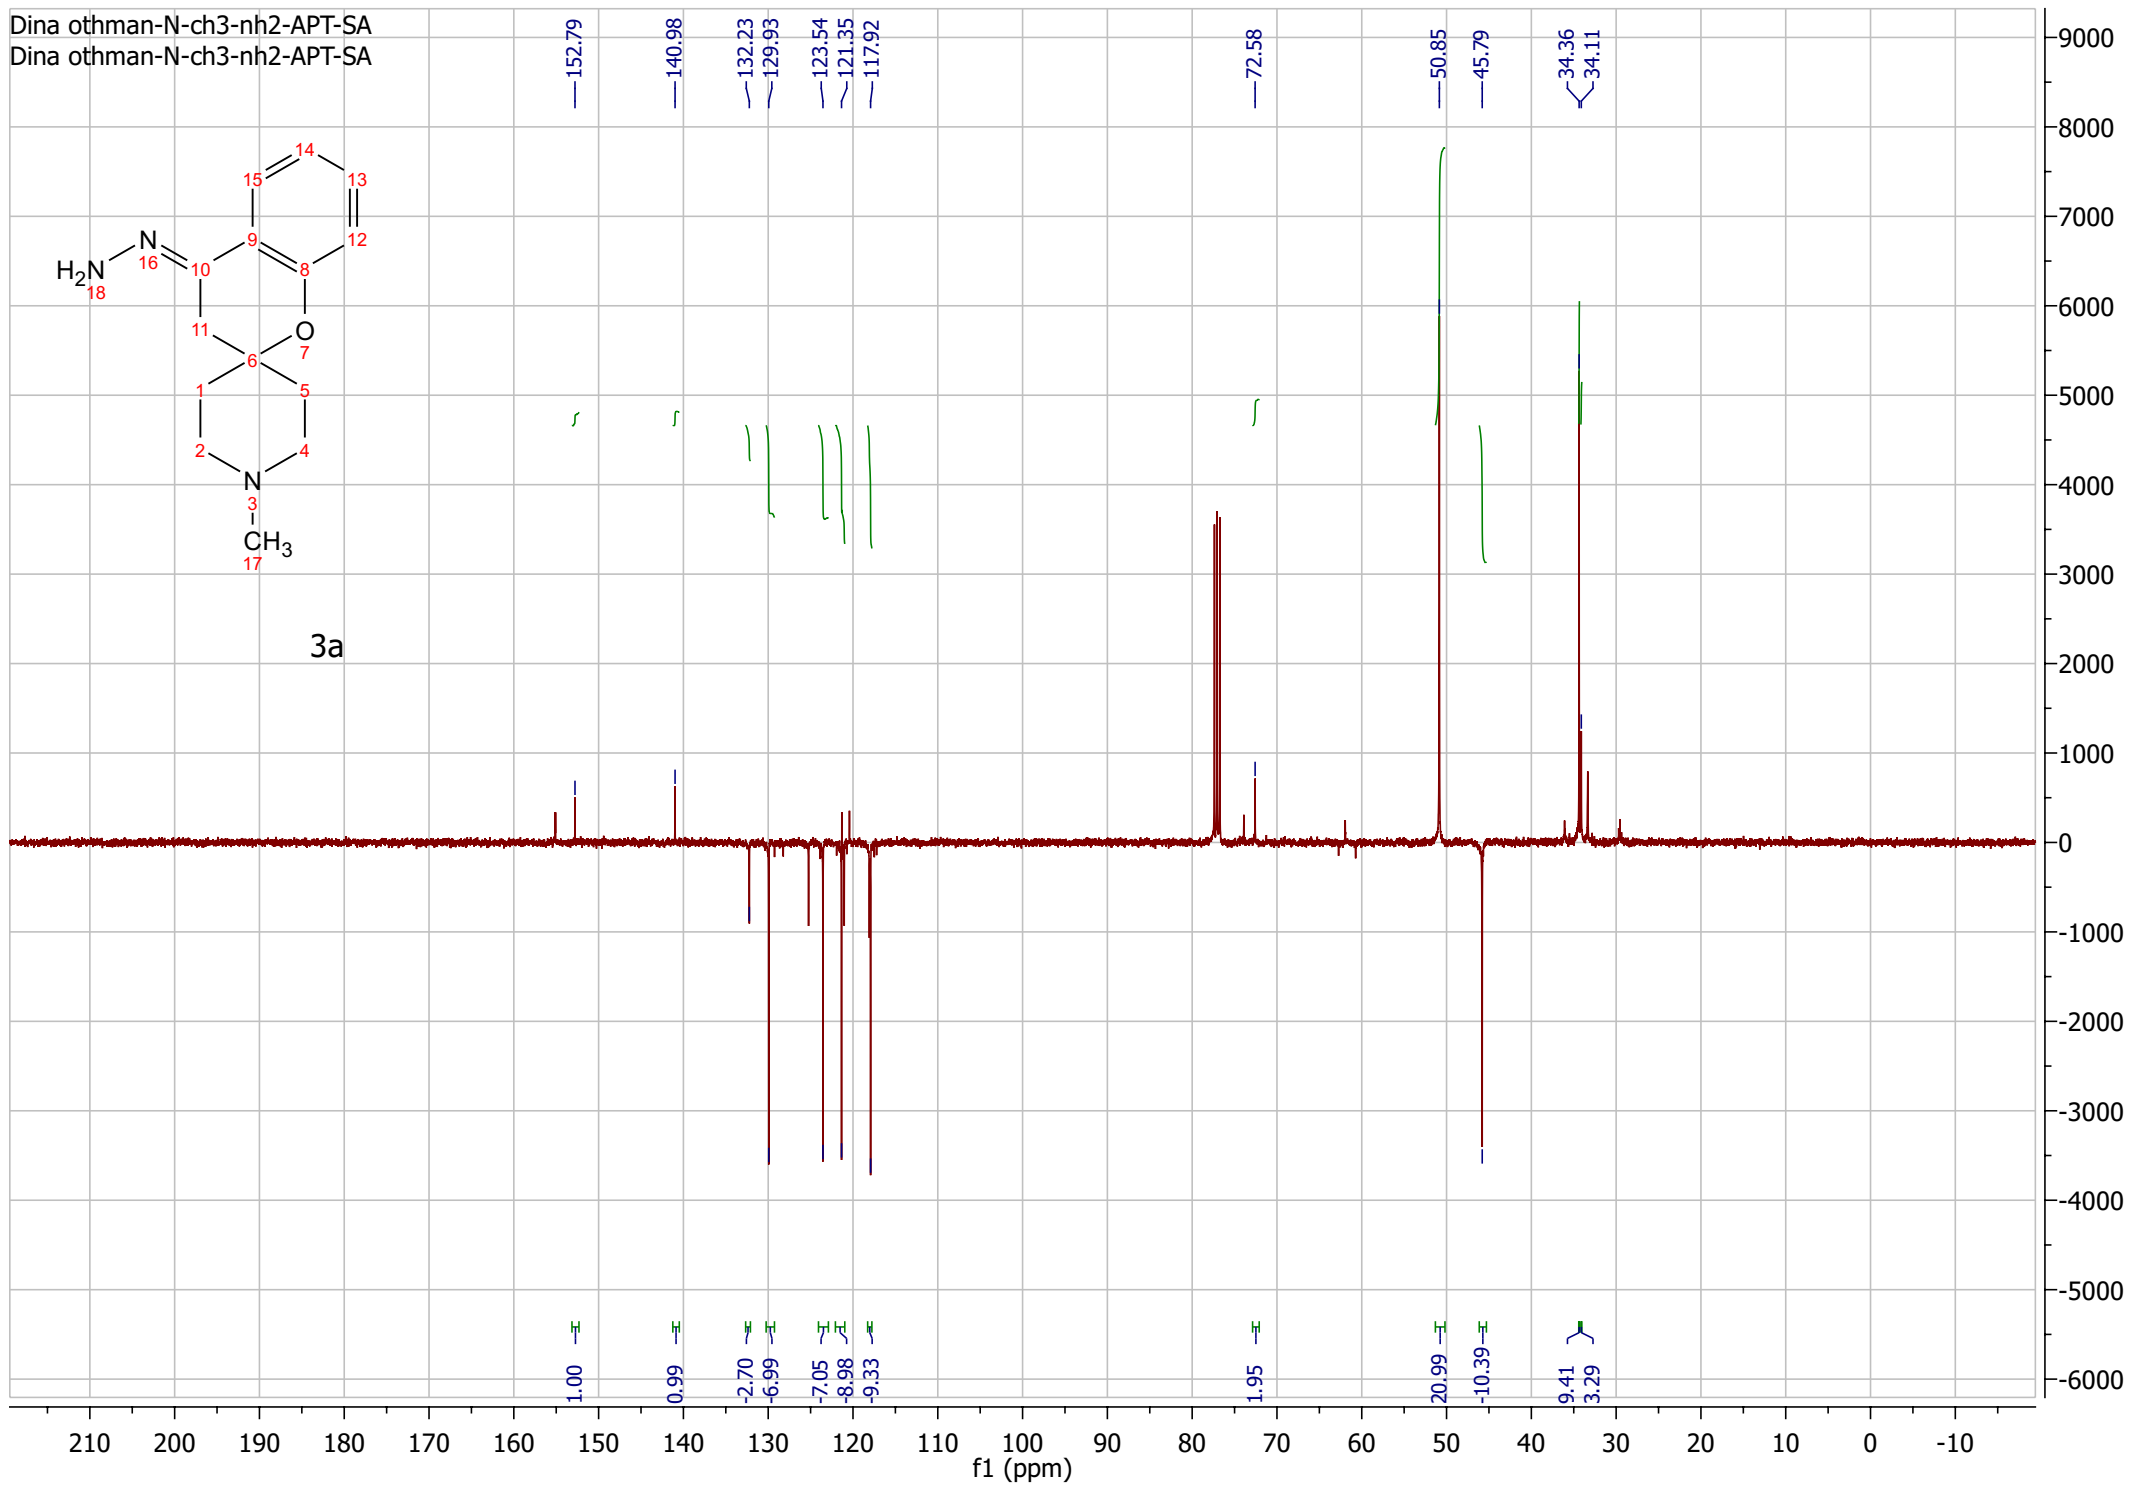

Abelrahman Hamdy- S2-cnmr HG  
Abelrahman Hamdy- S2-cnmr HG

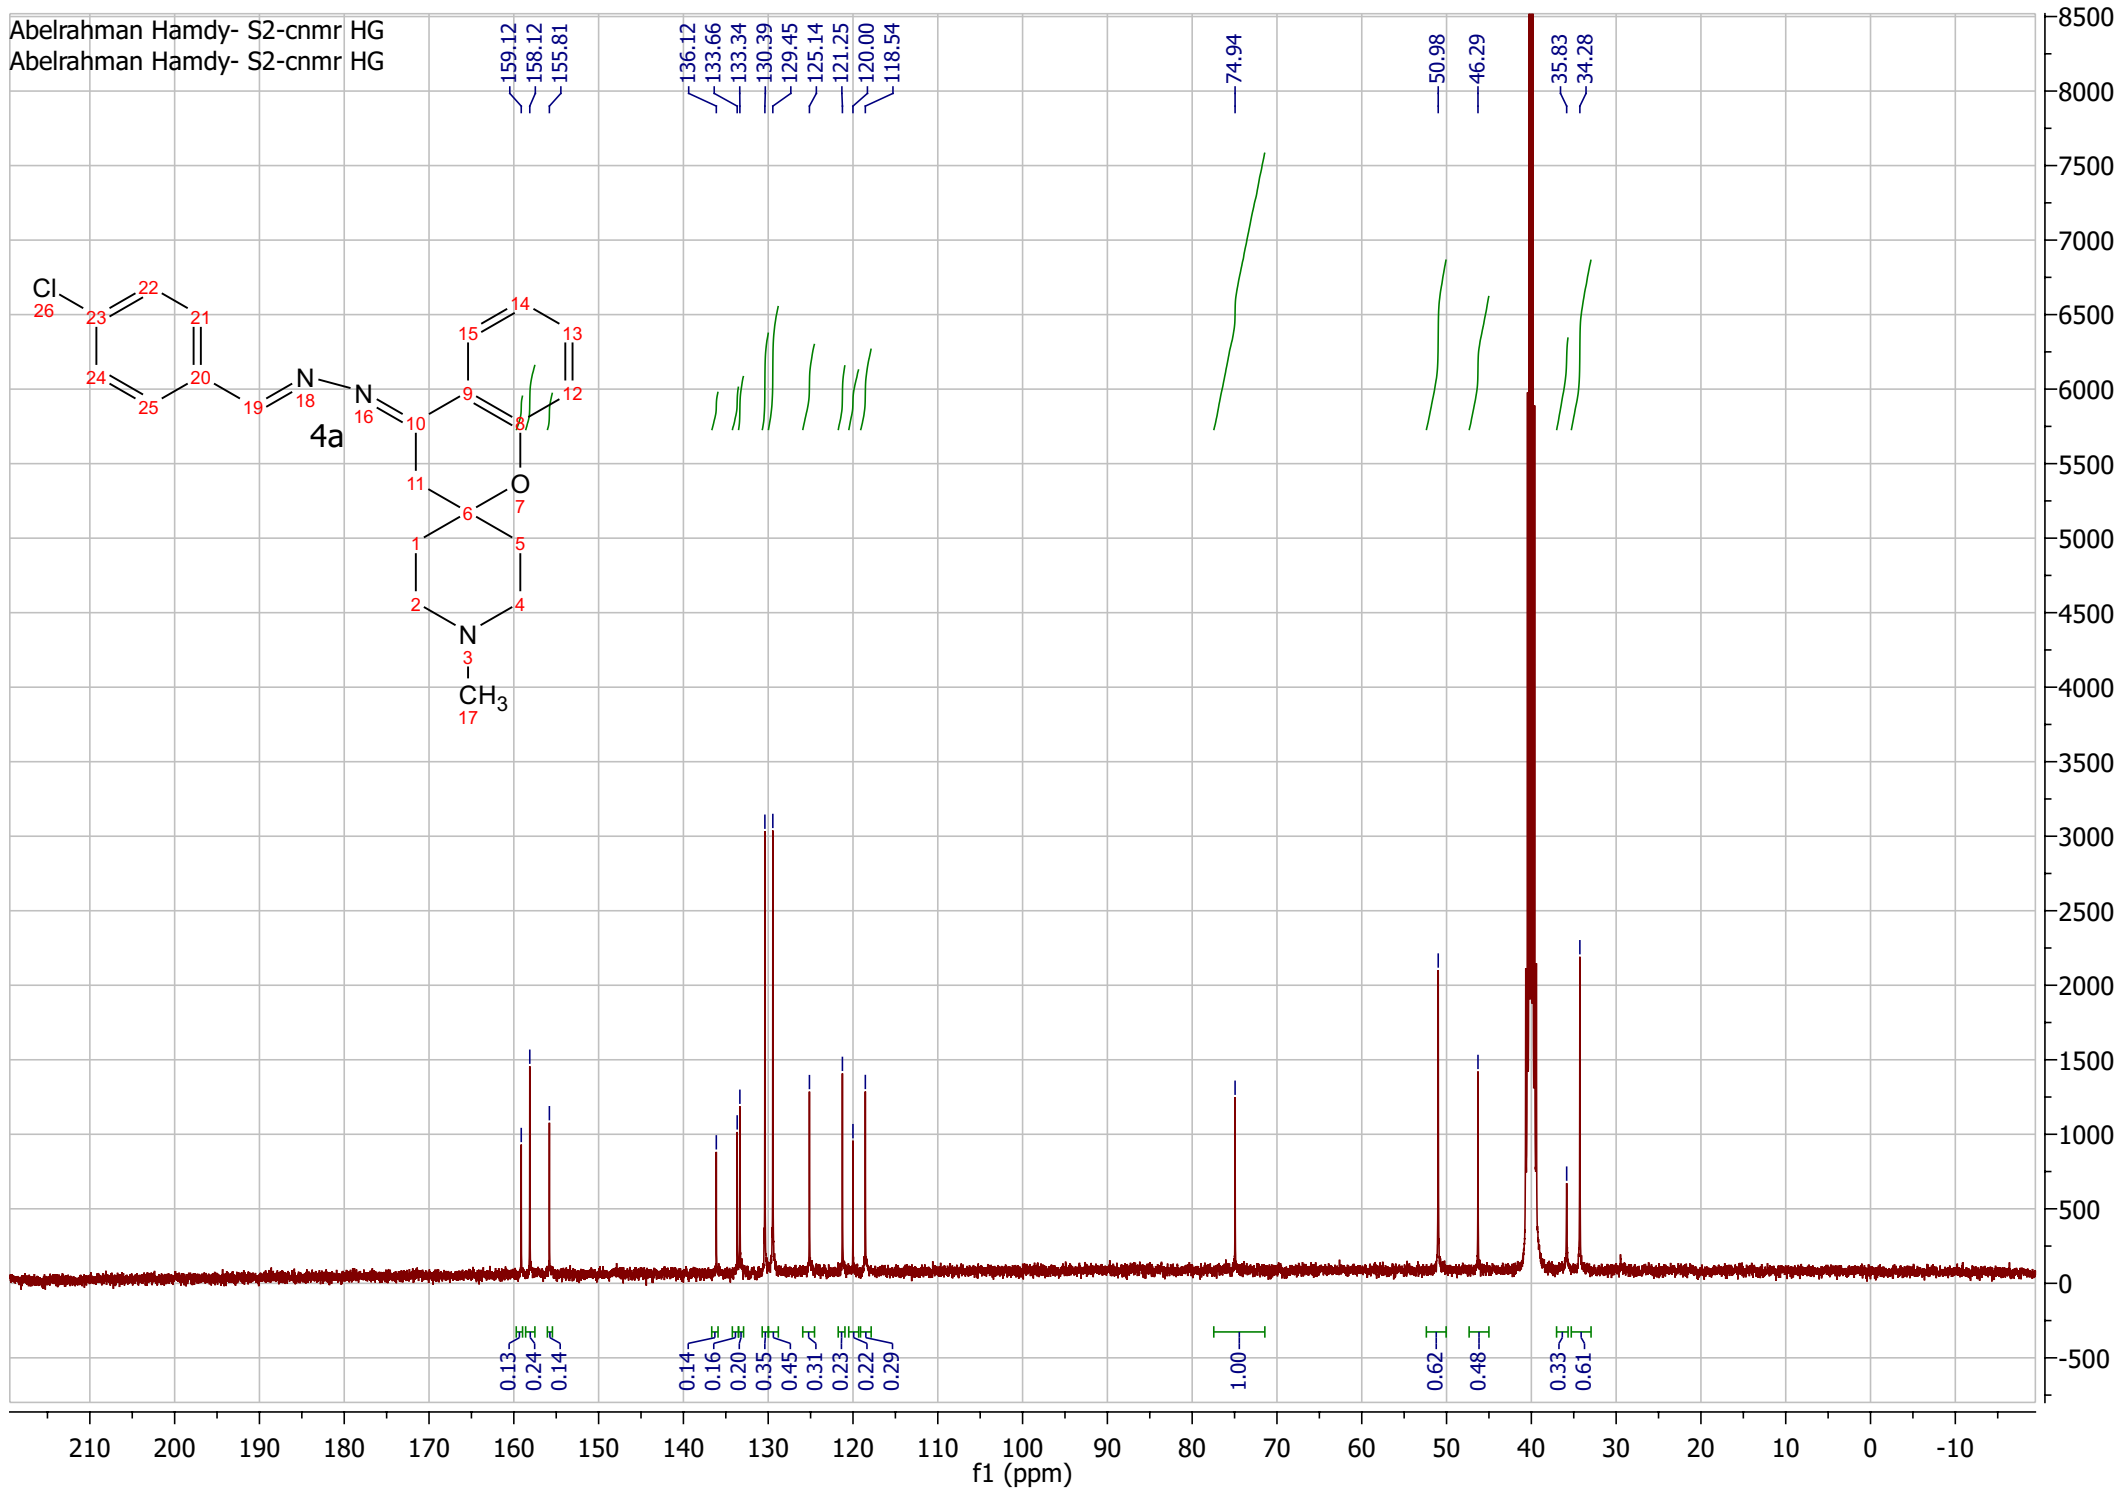

Dina Osman- S1- Cnmr -ow  
Dina Osman- S1- Cnmr

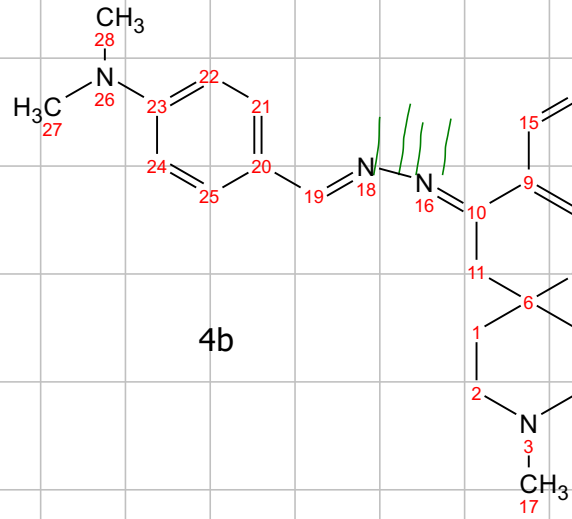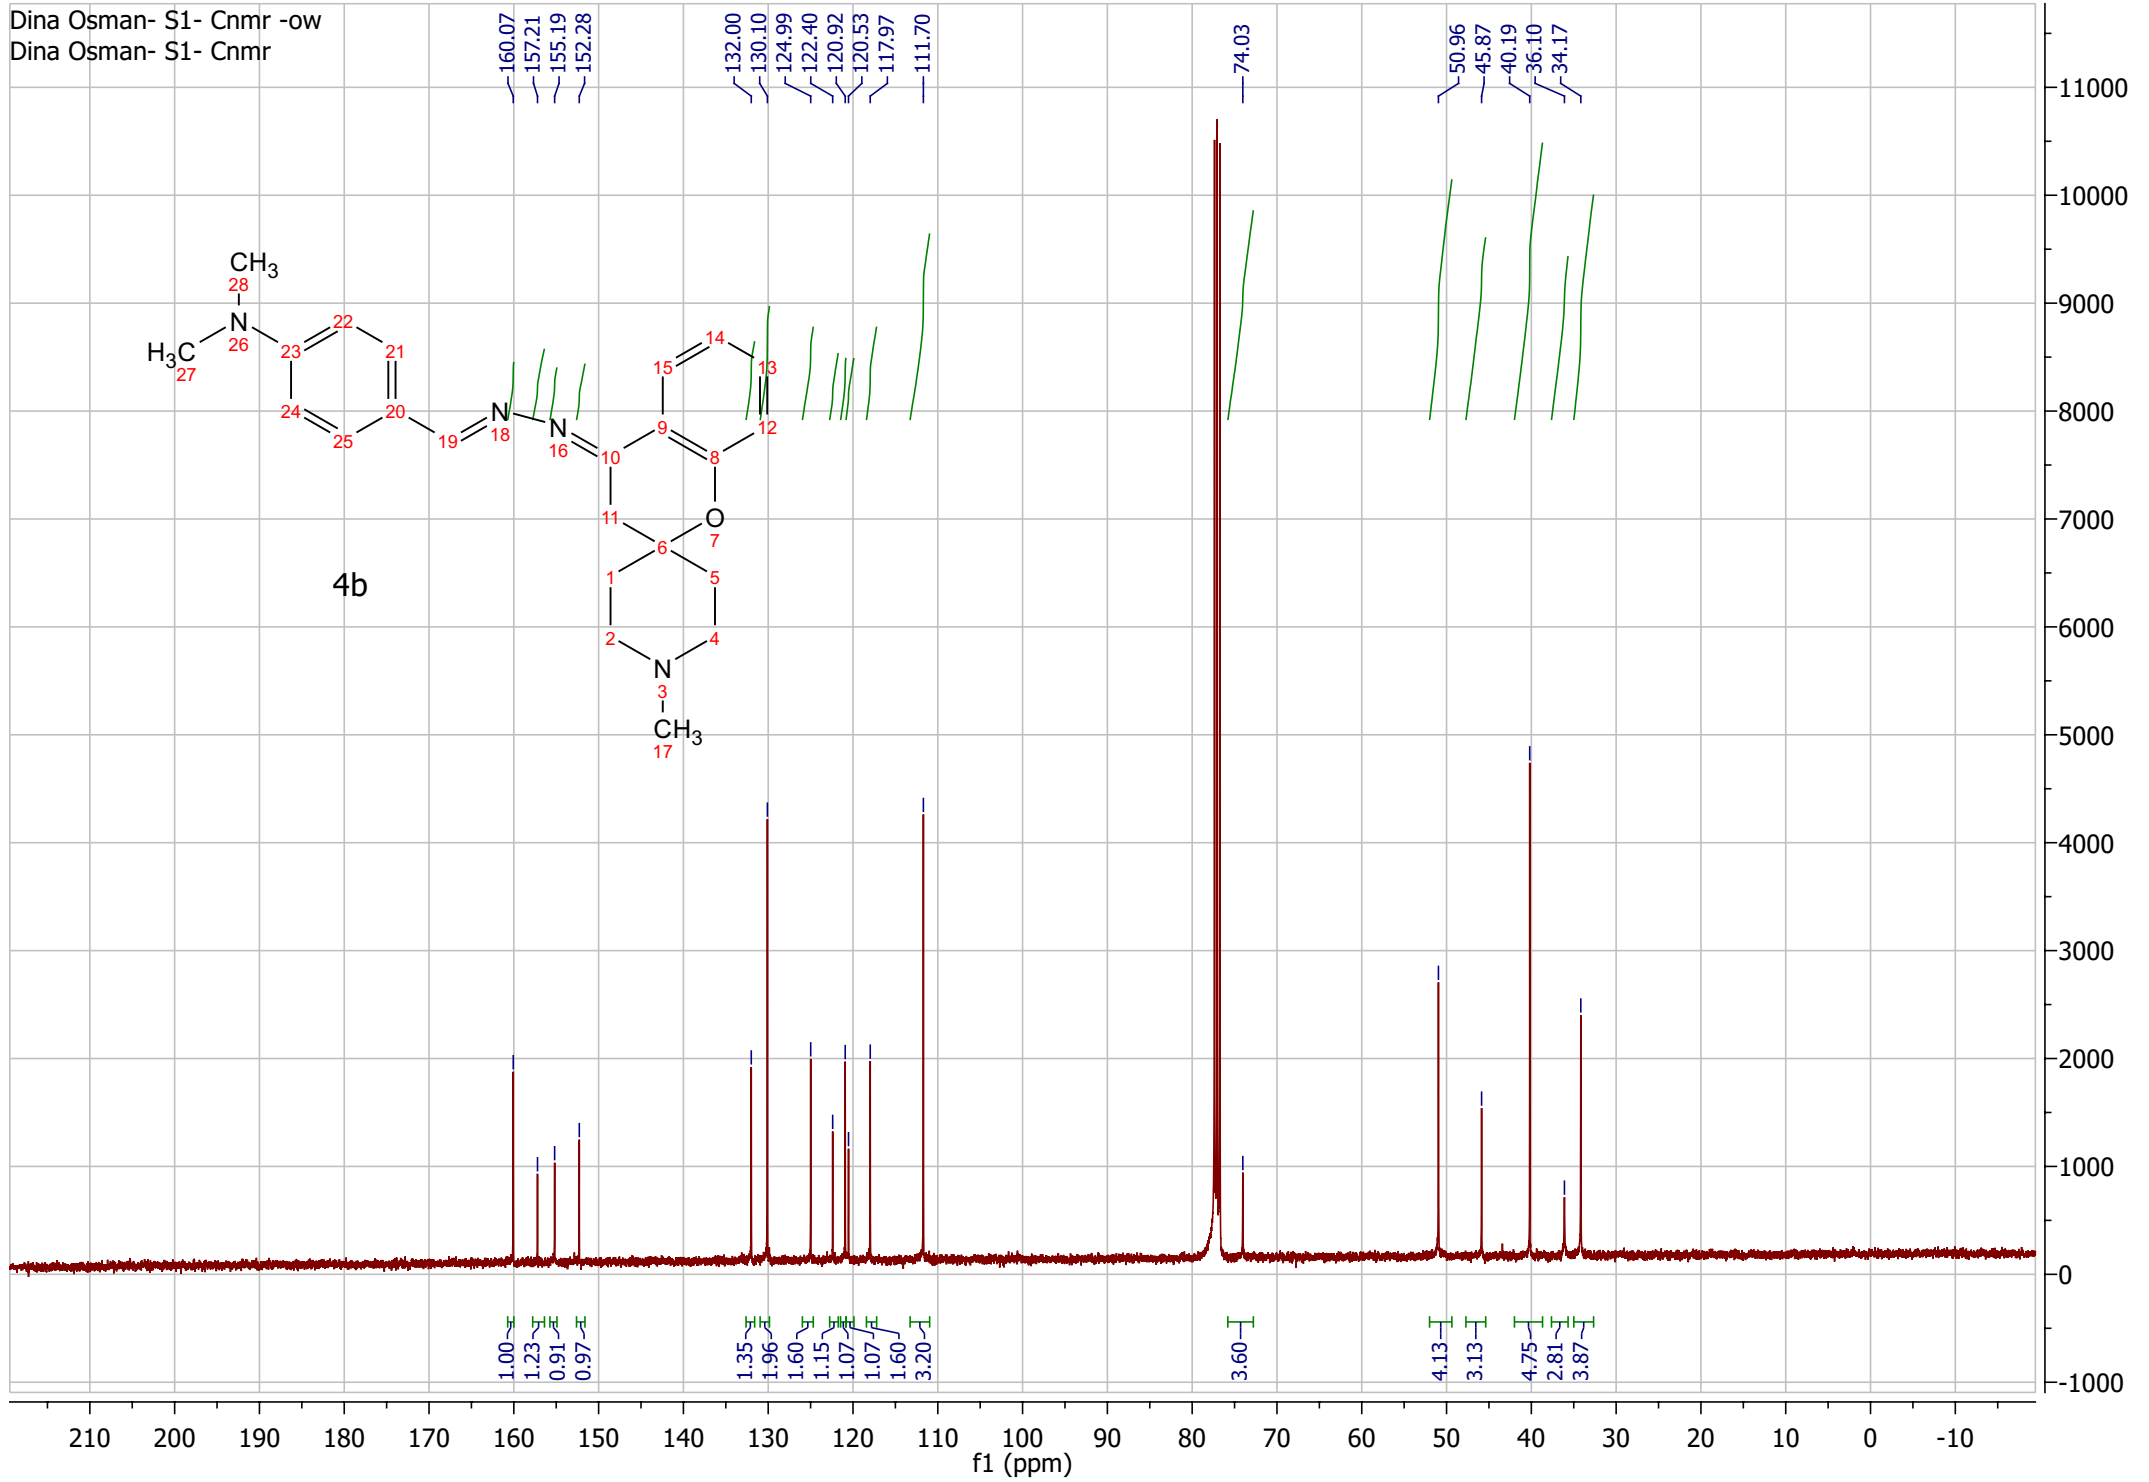

Dina Osman- SO3- Cnmr -ow  
Dina Osman- SO3- Cnmr

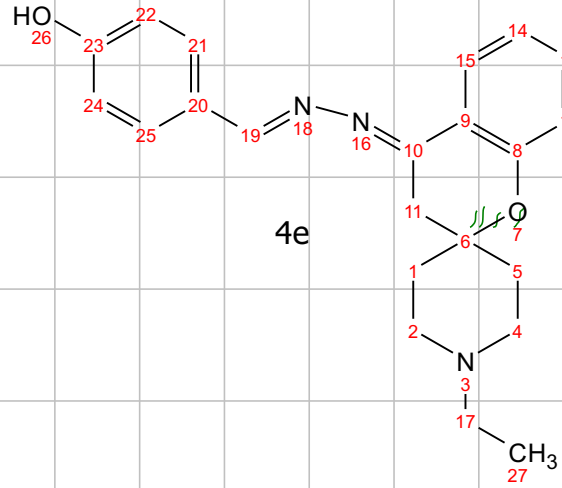

160.37  
159.51  
157.85  
155.16

132.31  
130.50  
126.12  
125.15  
121.07  
120.21  
117.95  
116.42

74.24

52.24  
48.11

36.33  
33.41

11.27

0.14  
0.17  
0.12  
0.16

0.24  
0.38  
0.20  
0.35  
0.29  
0.28  
0.28  
0.47

1.00

0.57  
1.13

1.13  
1.62

2.26

210 200 190 180 170 160 150 140 130 120 110 100 90 80 70 60 50 40 30 20 10 0 -10

f1 (ppm)

11000  
10000  
9000  
8000  
7000  
6000  
5000  
4000  
3000  
2000  
1000  
0  
-1000

Abelrahman Hamdy- AH 83-cnmr HG  
Abelrahman Hamdy- AH 83-cnmr HG

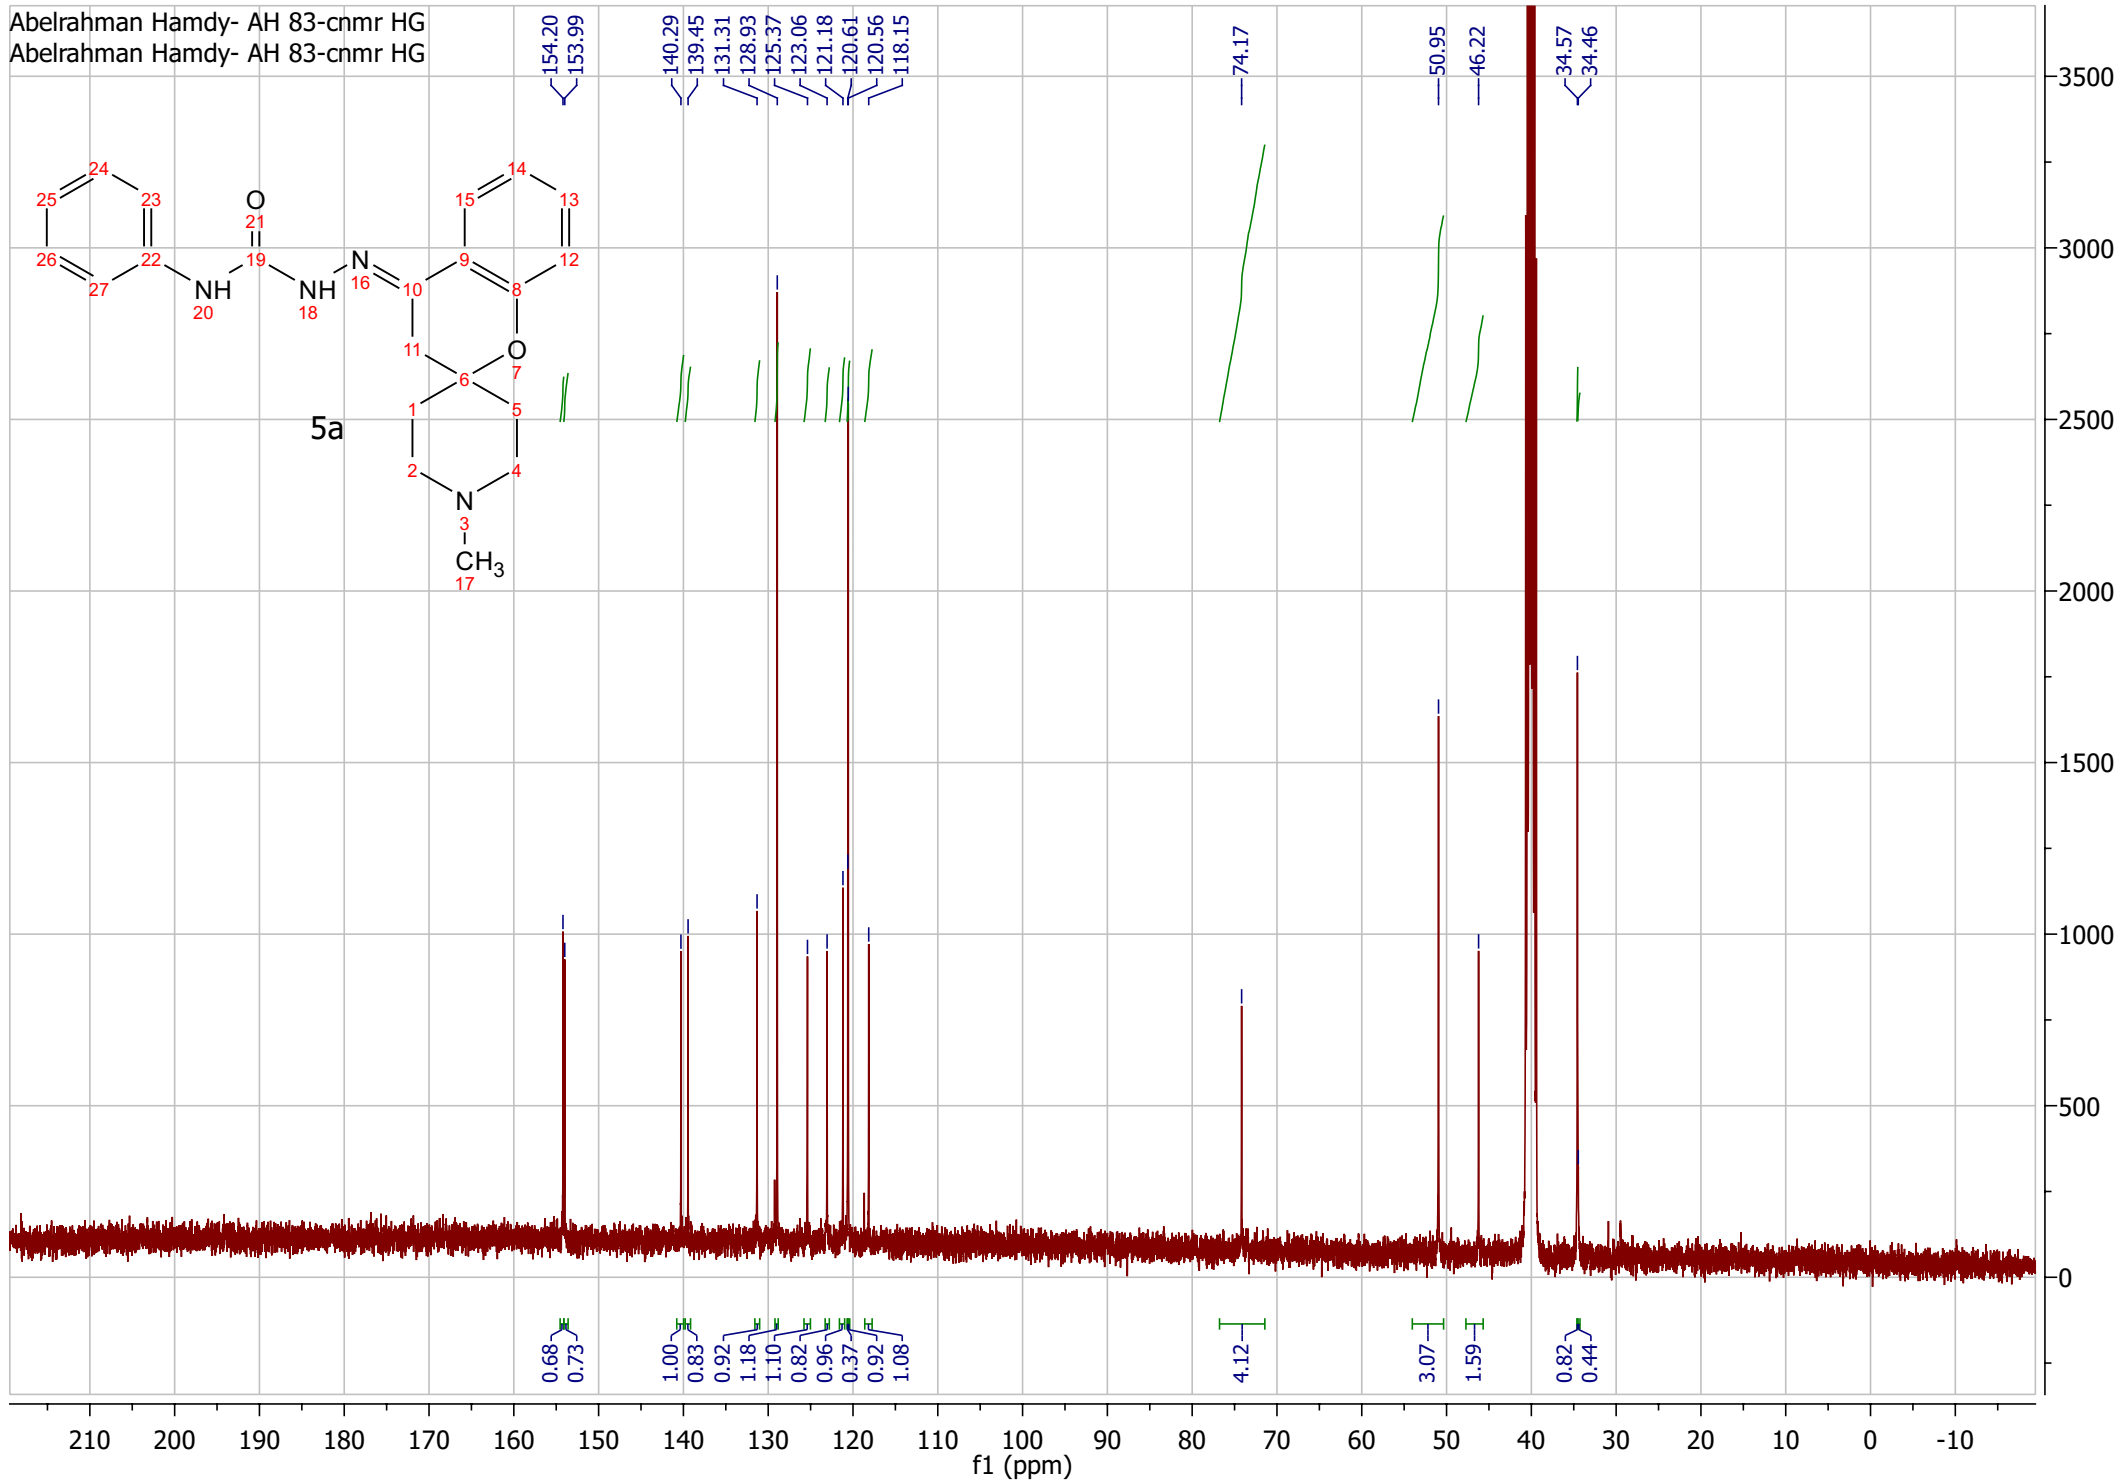

Dina Osman- N- C2H5 methoxy- Cnmr -ow  
Dina Osman- N- C2H5 methoxy- Cnmr

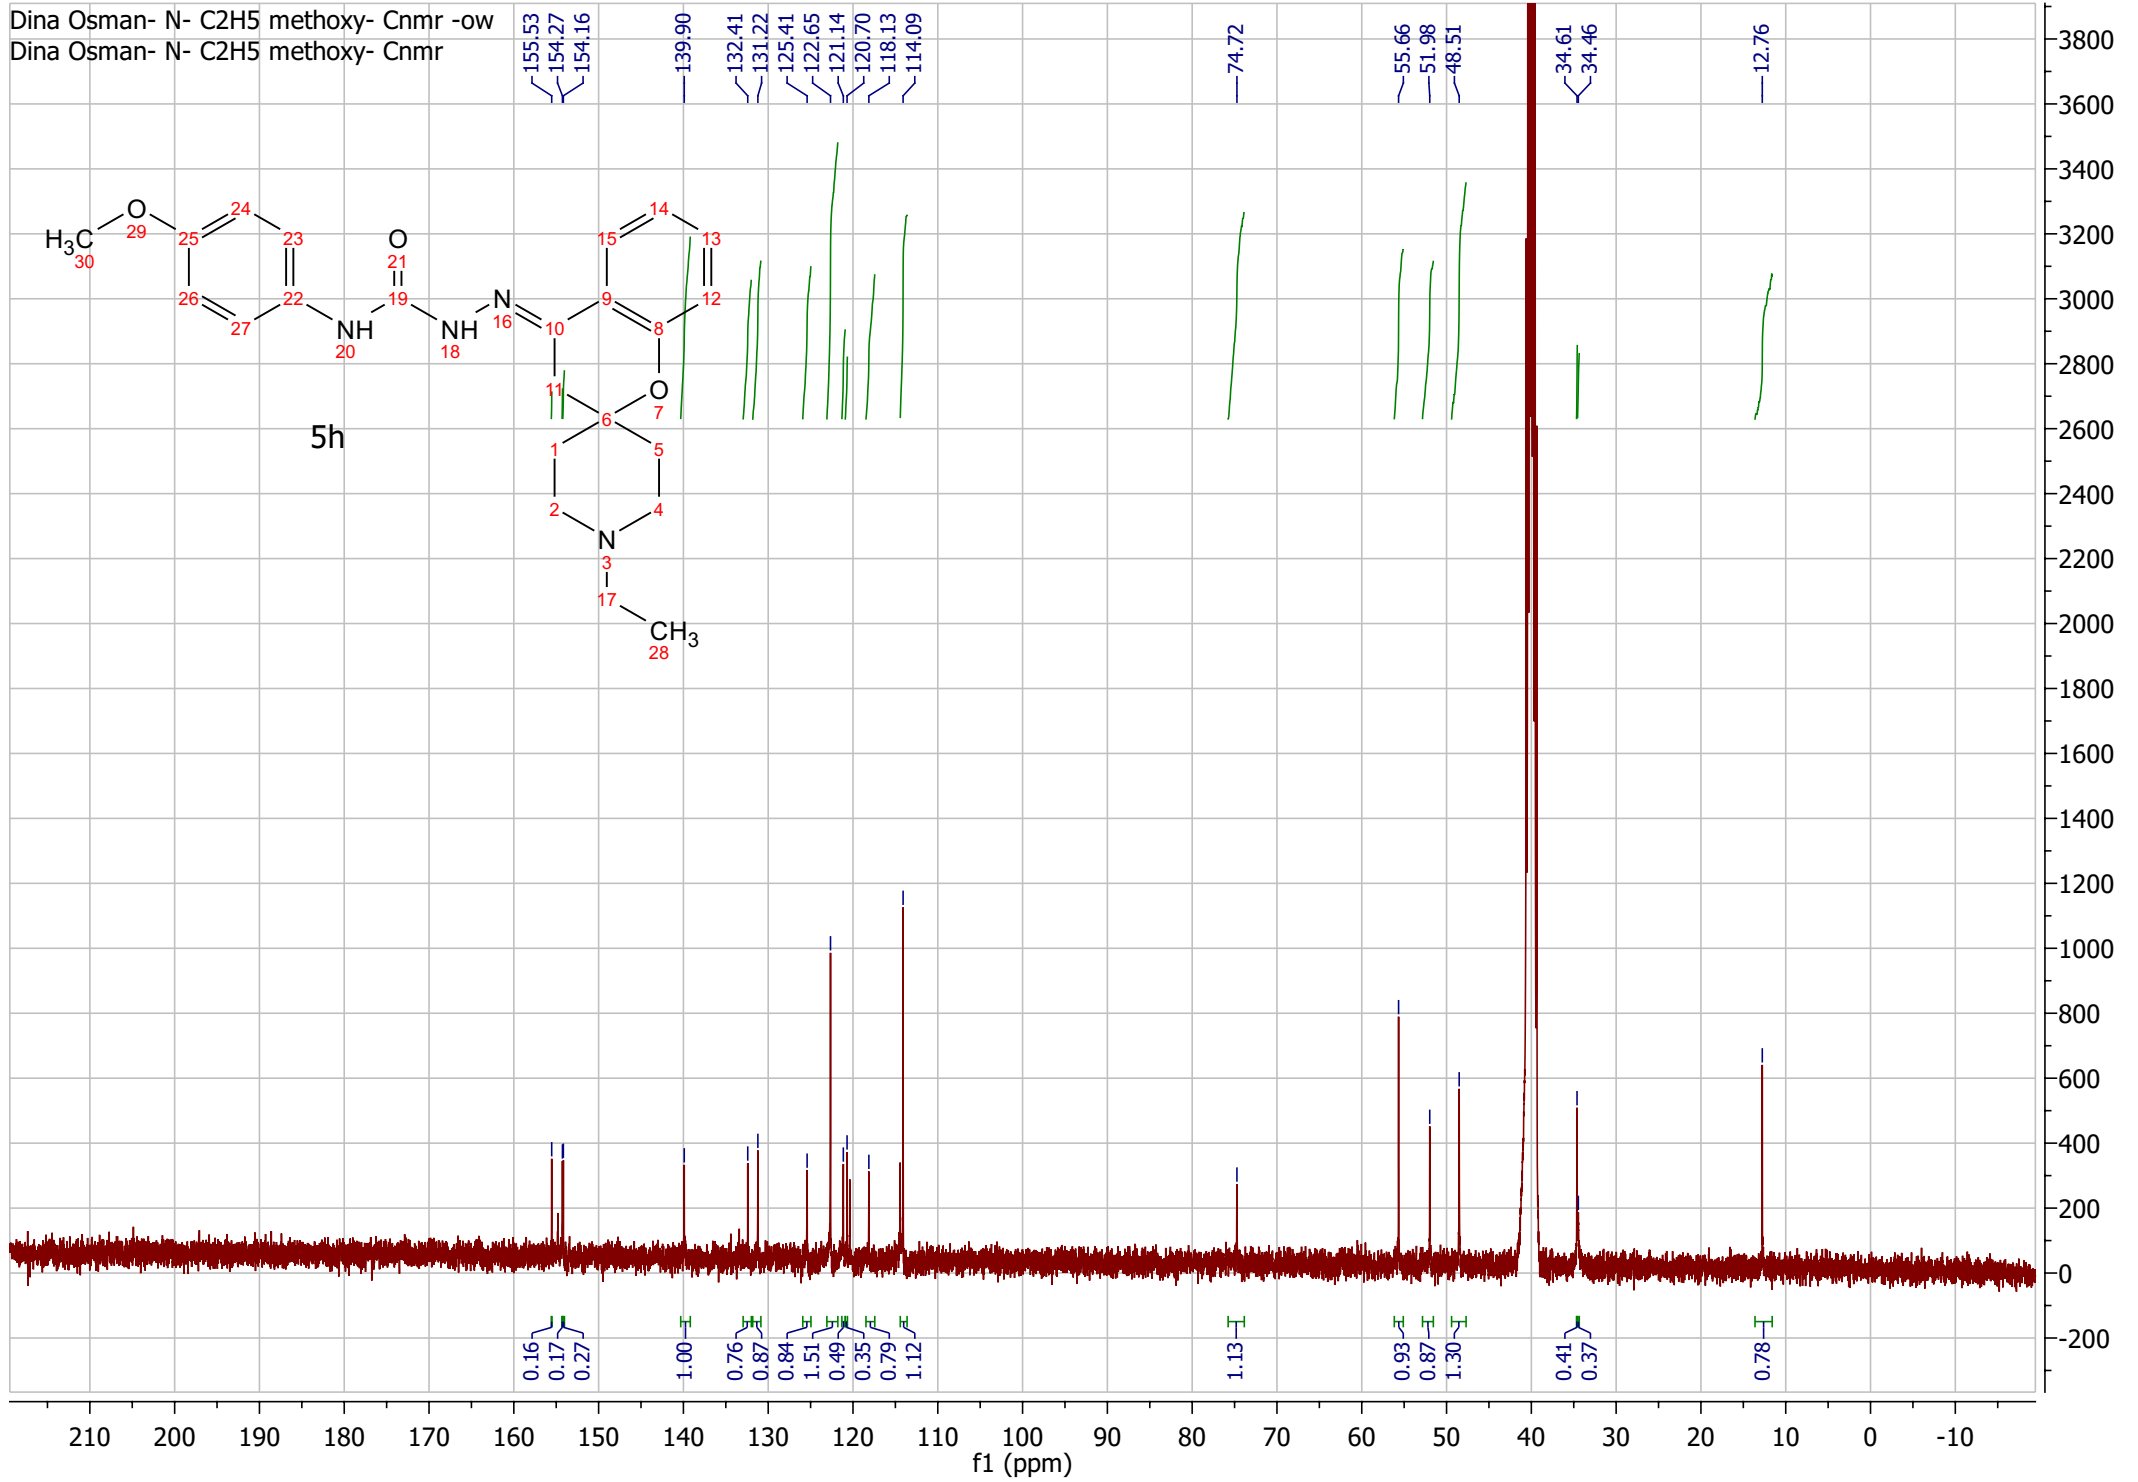

Dina Osman- N- ethyl tolyl- Cnmr -ow  
Dina Osman- N- ethyl tolyl- Cnmr

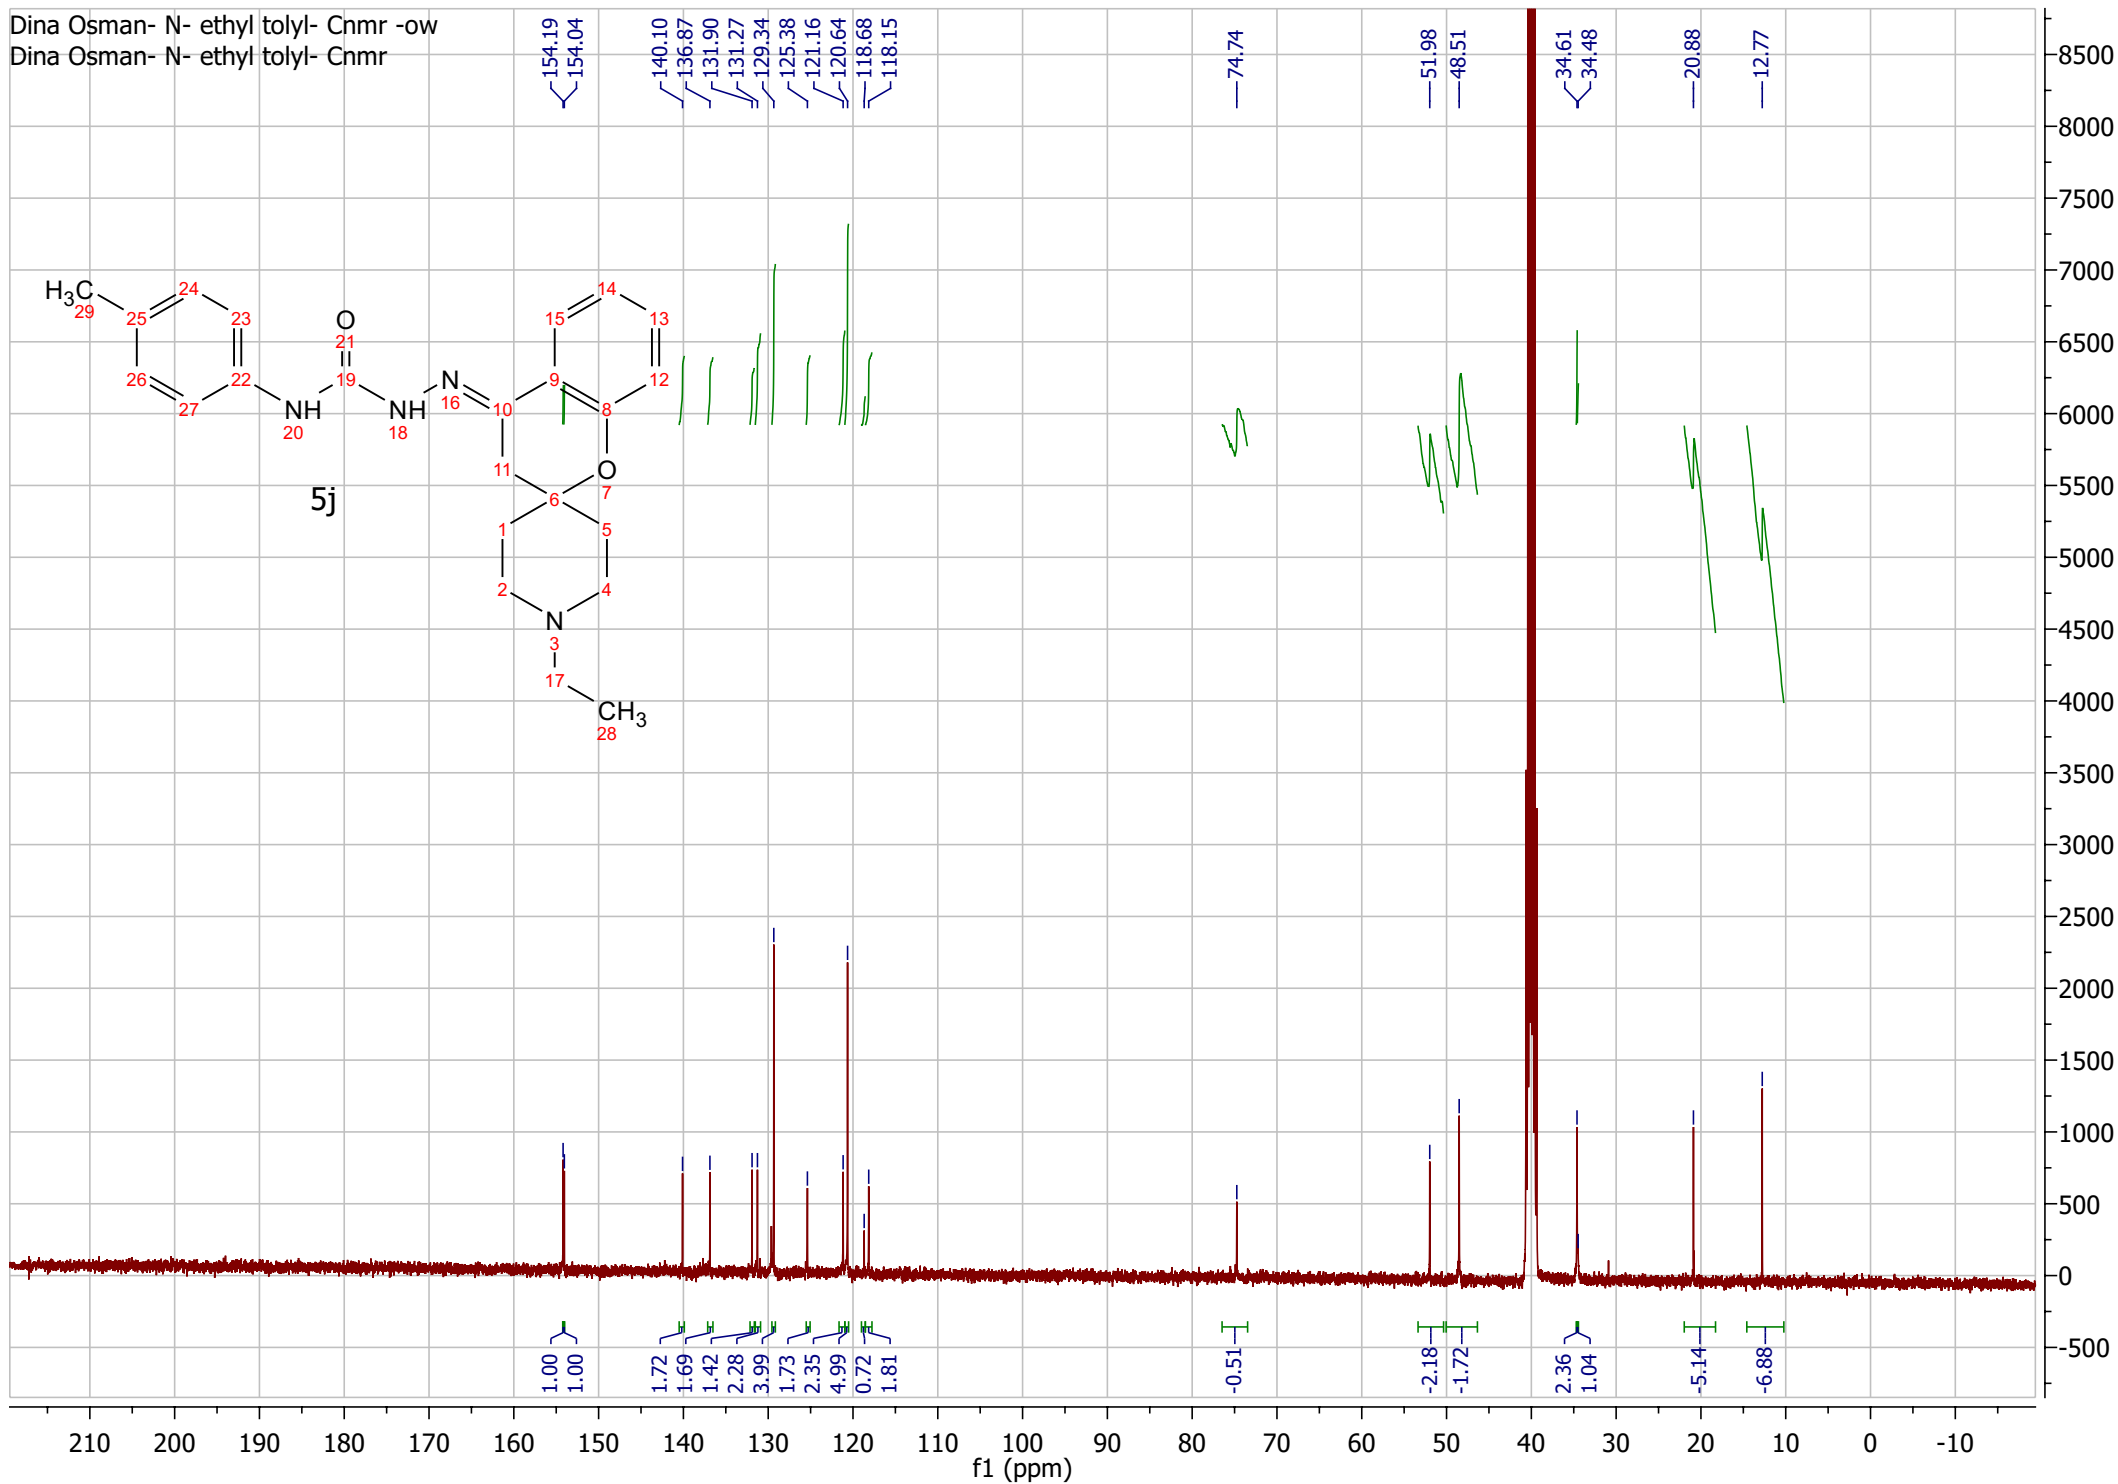



Dina Osman- N-CH3 methoxy- Cnmr -ow  
Dina Osman- N-CH3 methoxy- Cnmr

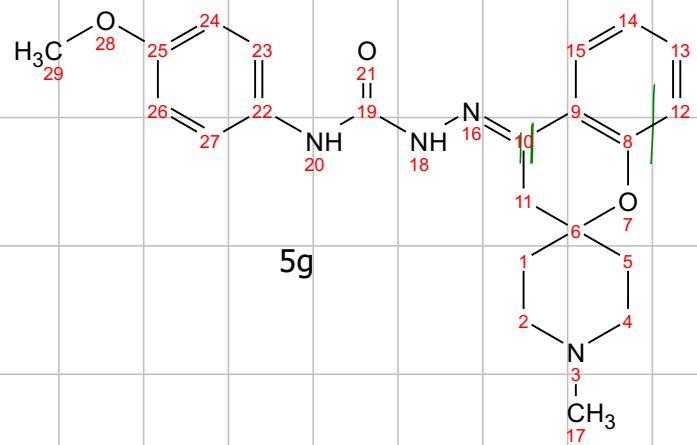

5g

155.53  
154.26  
154.13  
139.87  
132.41  
131.22  
125.41  
122.65  
121.15  
120.68  
118.12  
114.09

74.14  
55.66  
50.94  
46.23  
34.55  
34.46

1.00  
1.25  
1.31  
2.51  
3.13  
4.79  
3.11  
5.25  
4.30  
3.57  
3.60  
4.53

8.72  
4.45  
4.15  
2.52  
2.00  
0.59

210 200 190 180 170 160 150 140 130 120 110 100 90 80 70 60 50 40 30 20 10 0 -10  
f1 (ppm)

4500  
4000  
3500  
3000  
2500  
2000  
1500  
1000  
500  
0

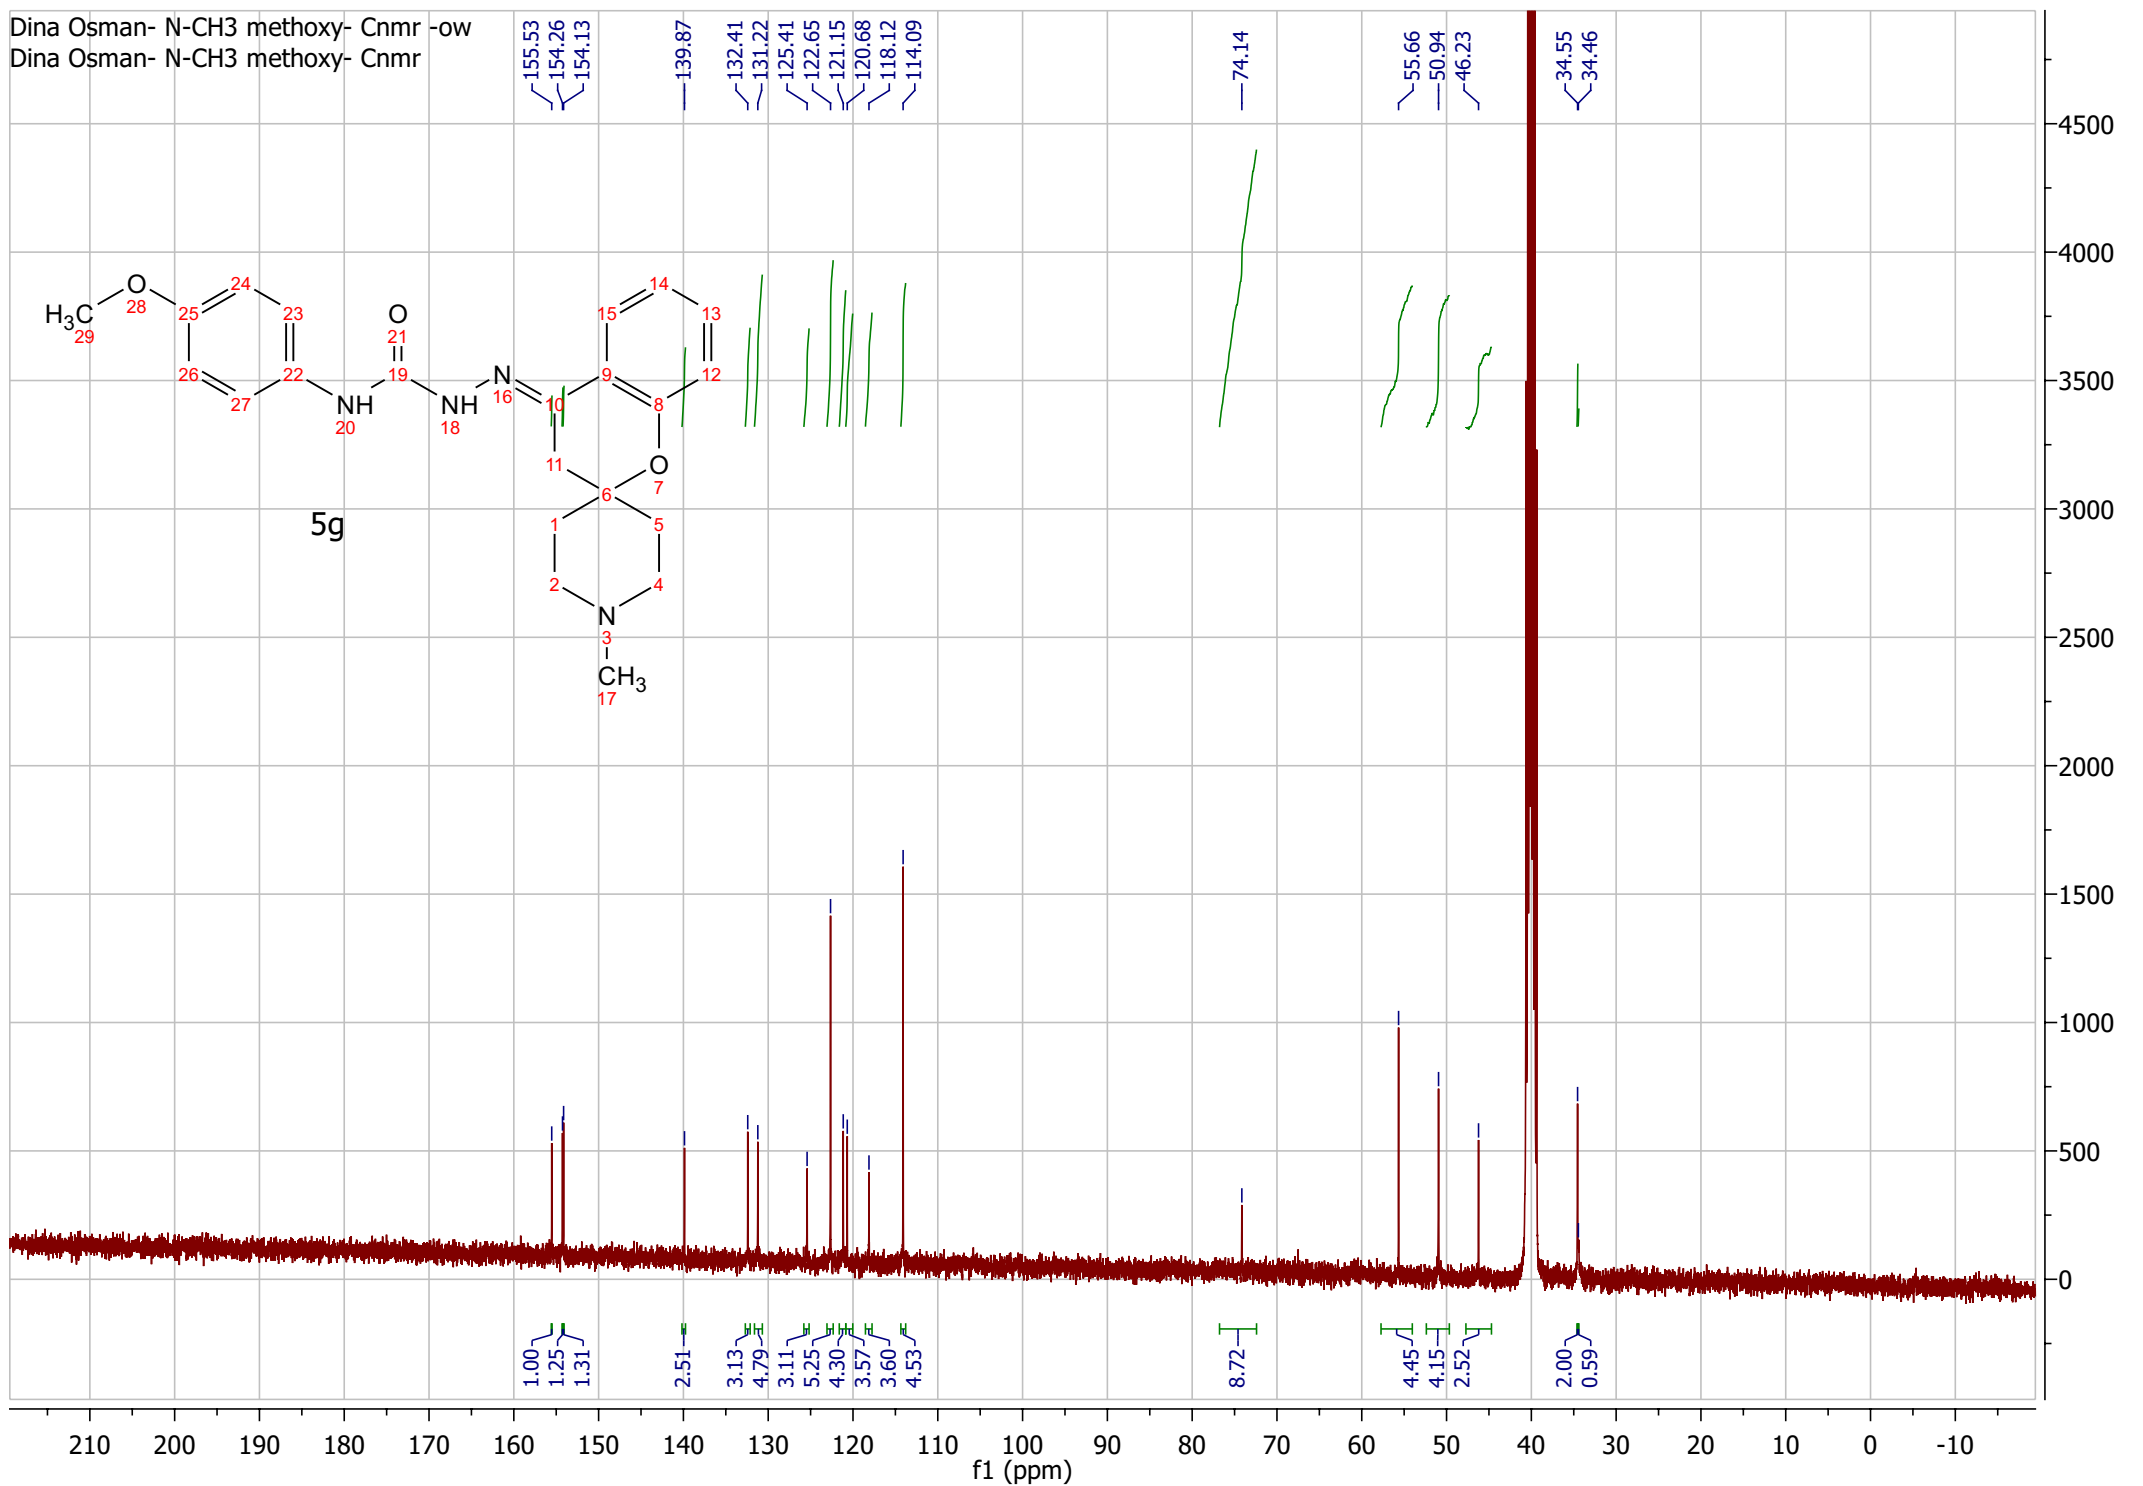

Dina Osman- N-CH3 tolyl- Cnmr -ow  
Dina Osman- N-CH3 tolyl- Cnmr

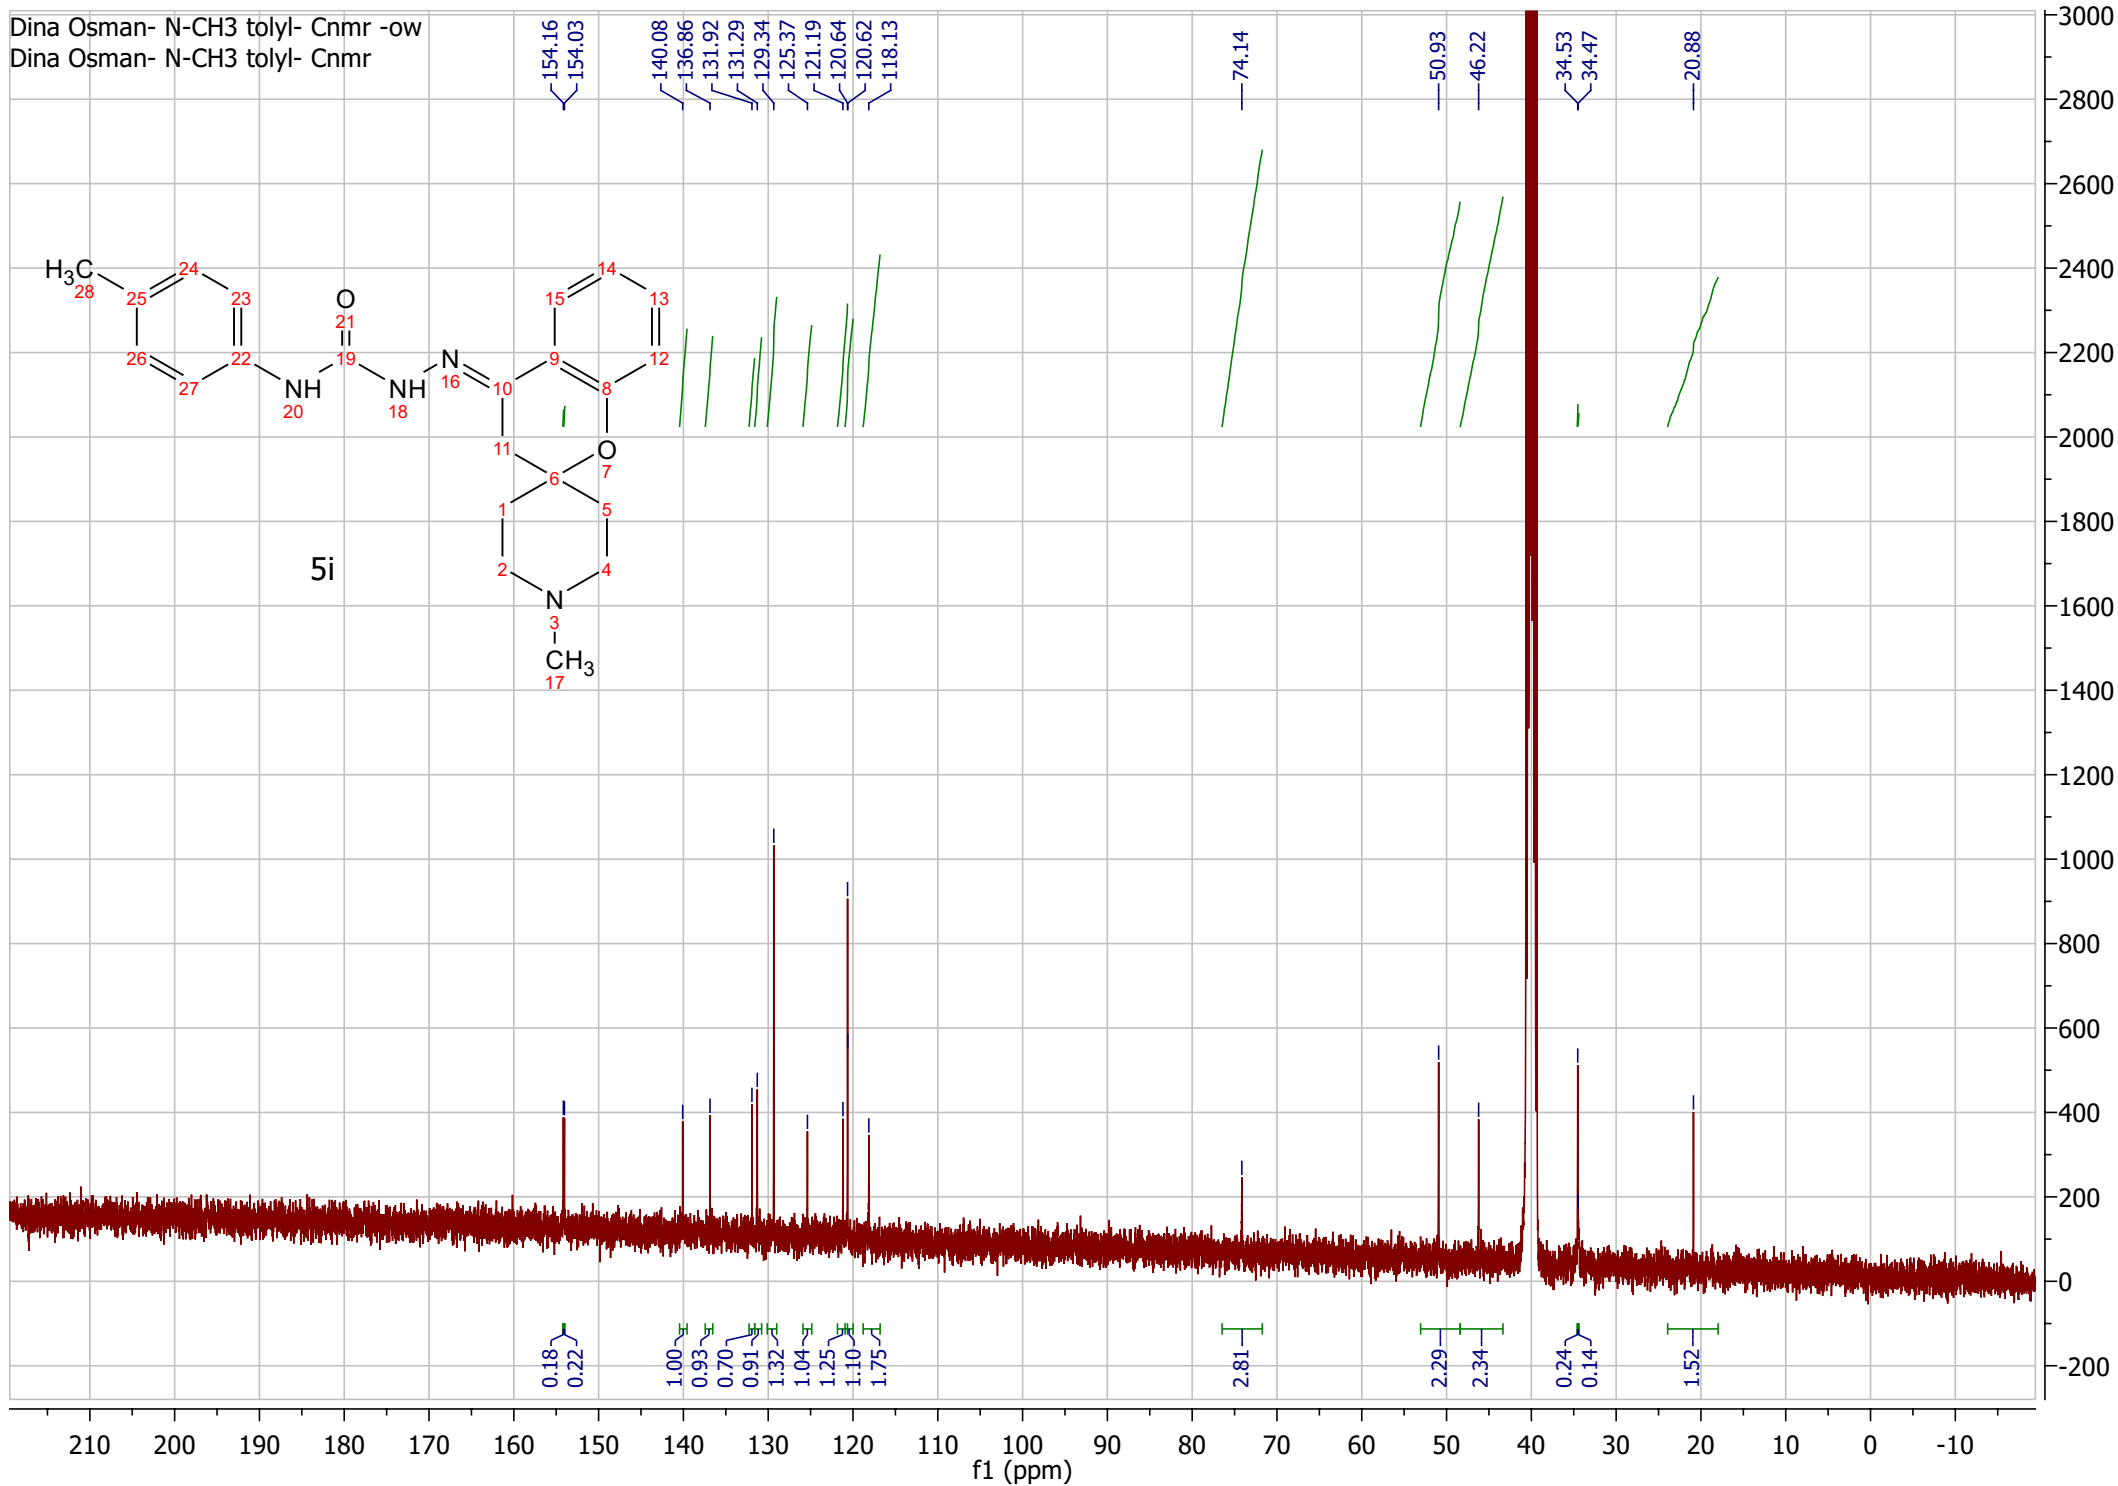

Abelrahman Hamdy- AH 82-cnmr HG  
Abelrahman Hamdy- AH 82-cnmr HG

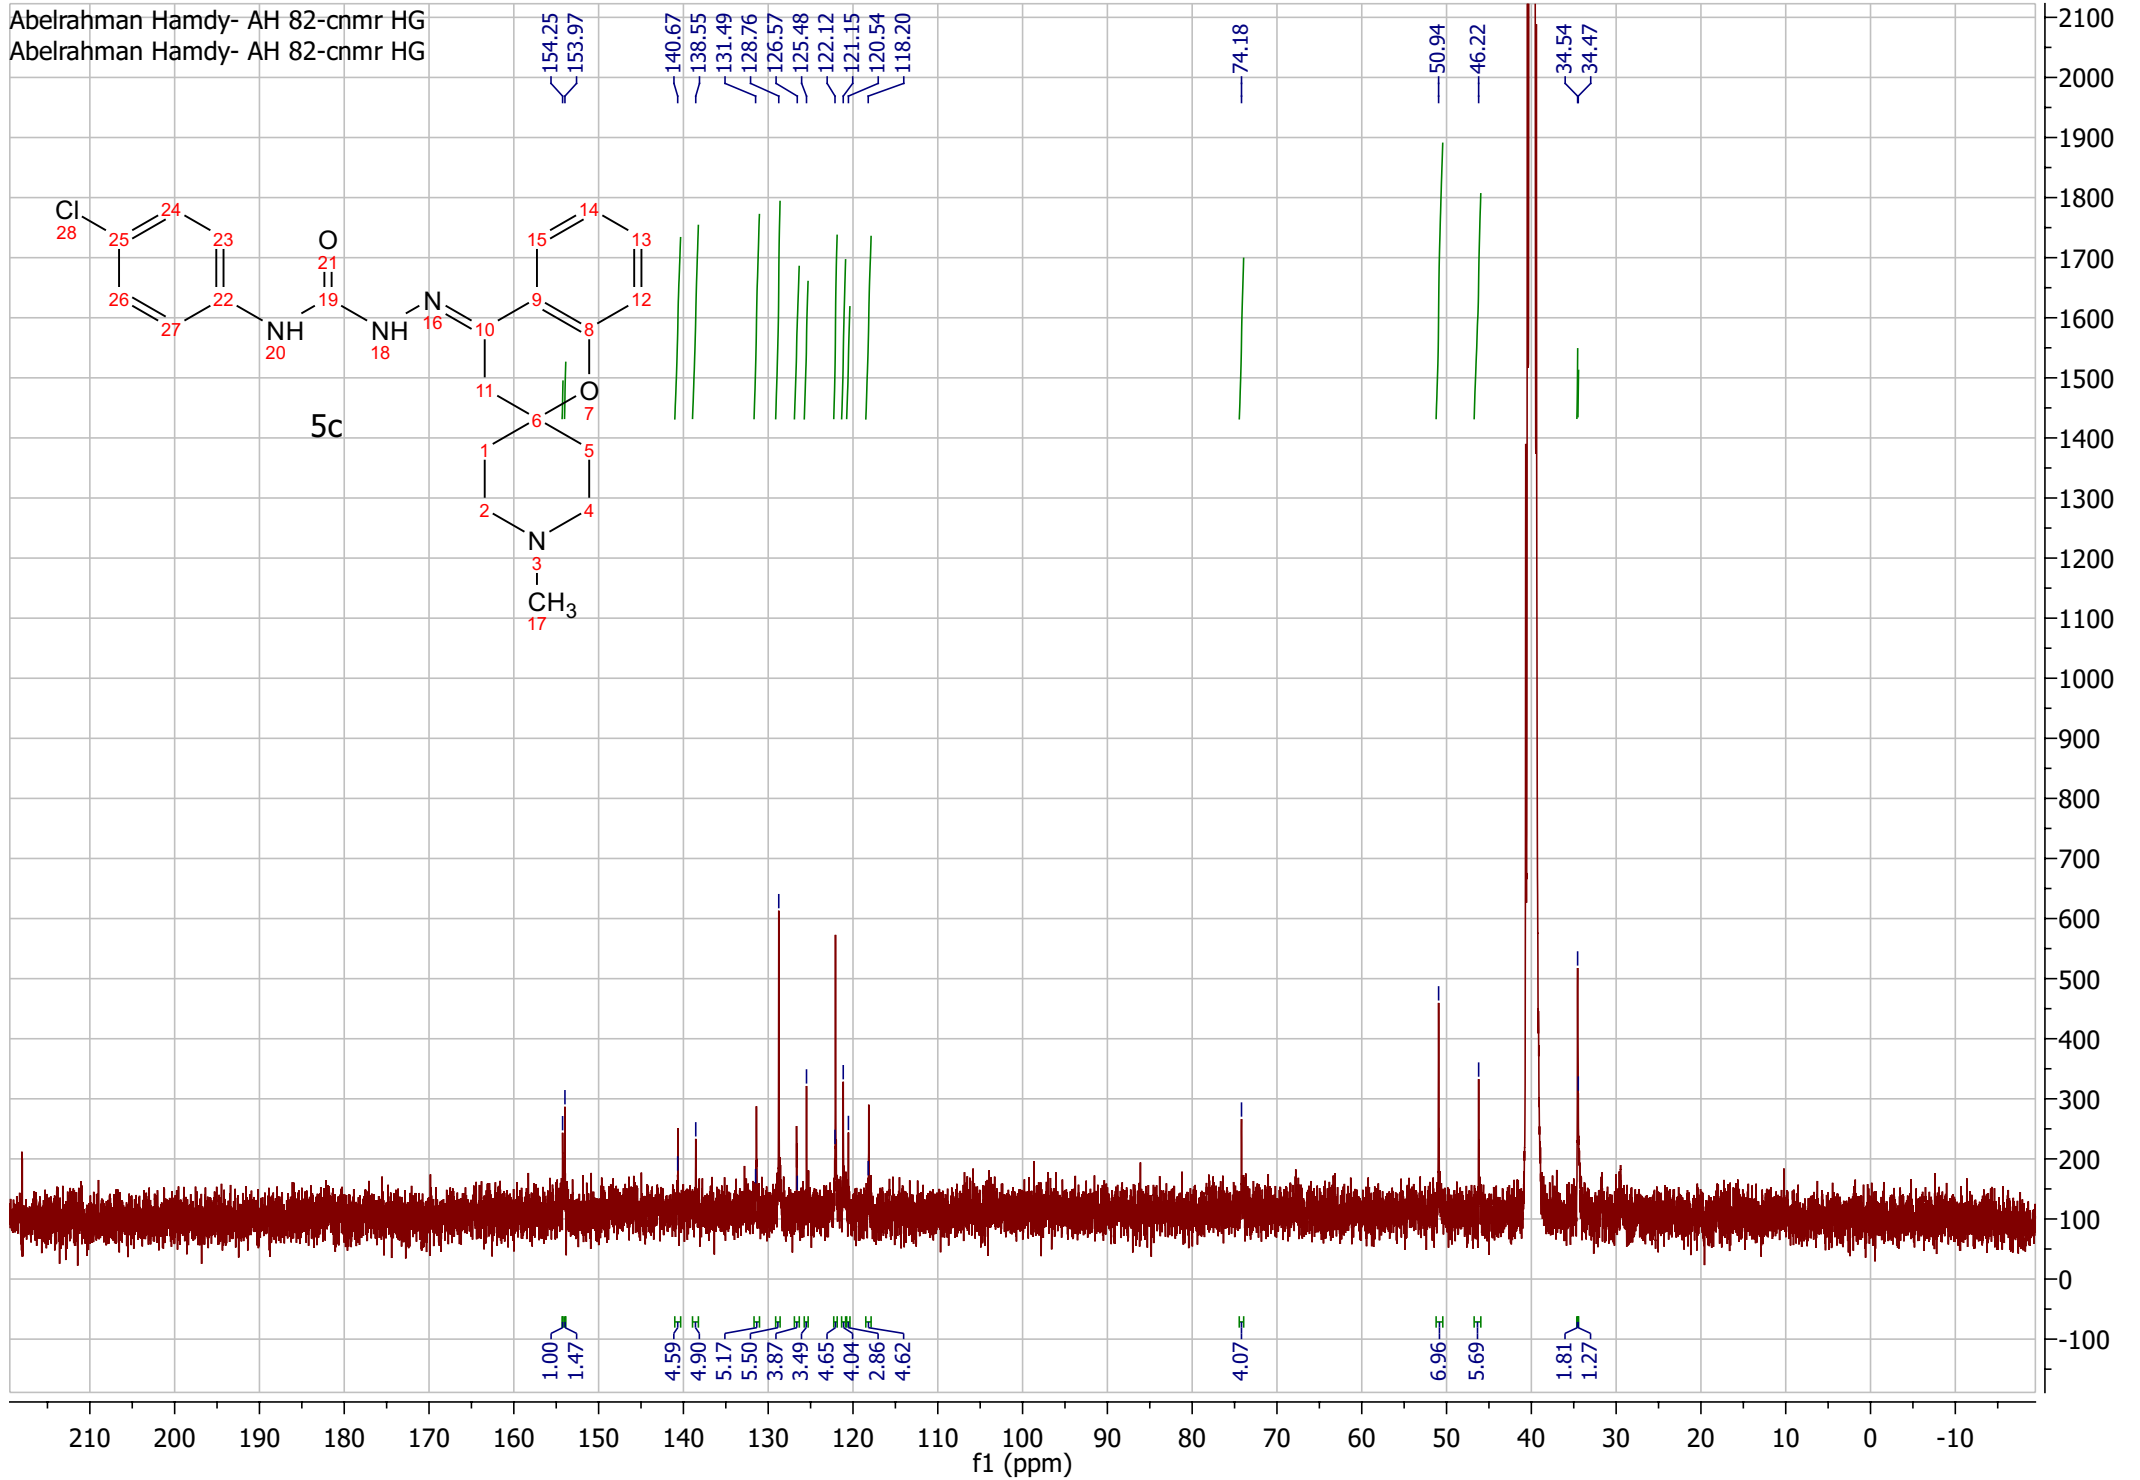

Abelrahman Hamdy- AH 91-cnmr HG  
Abelrahman Hamdy- AH 91-cnmr HG

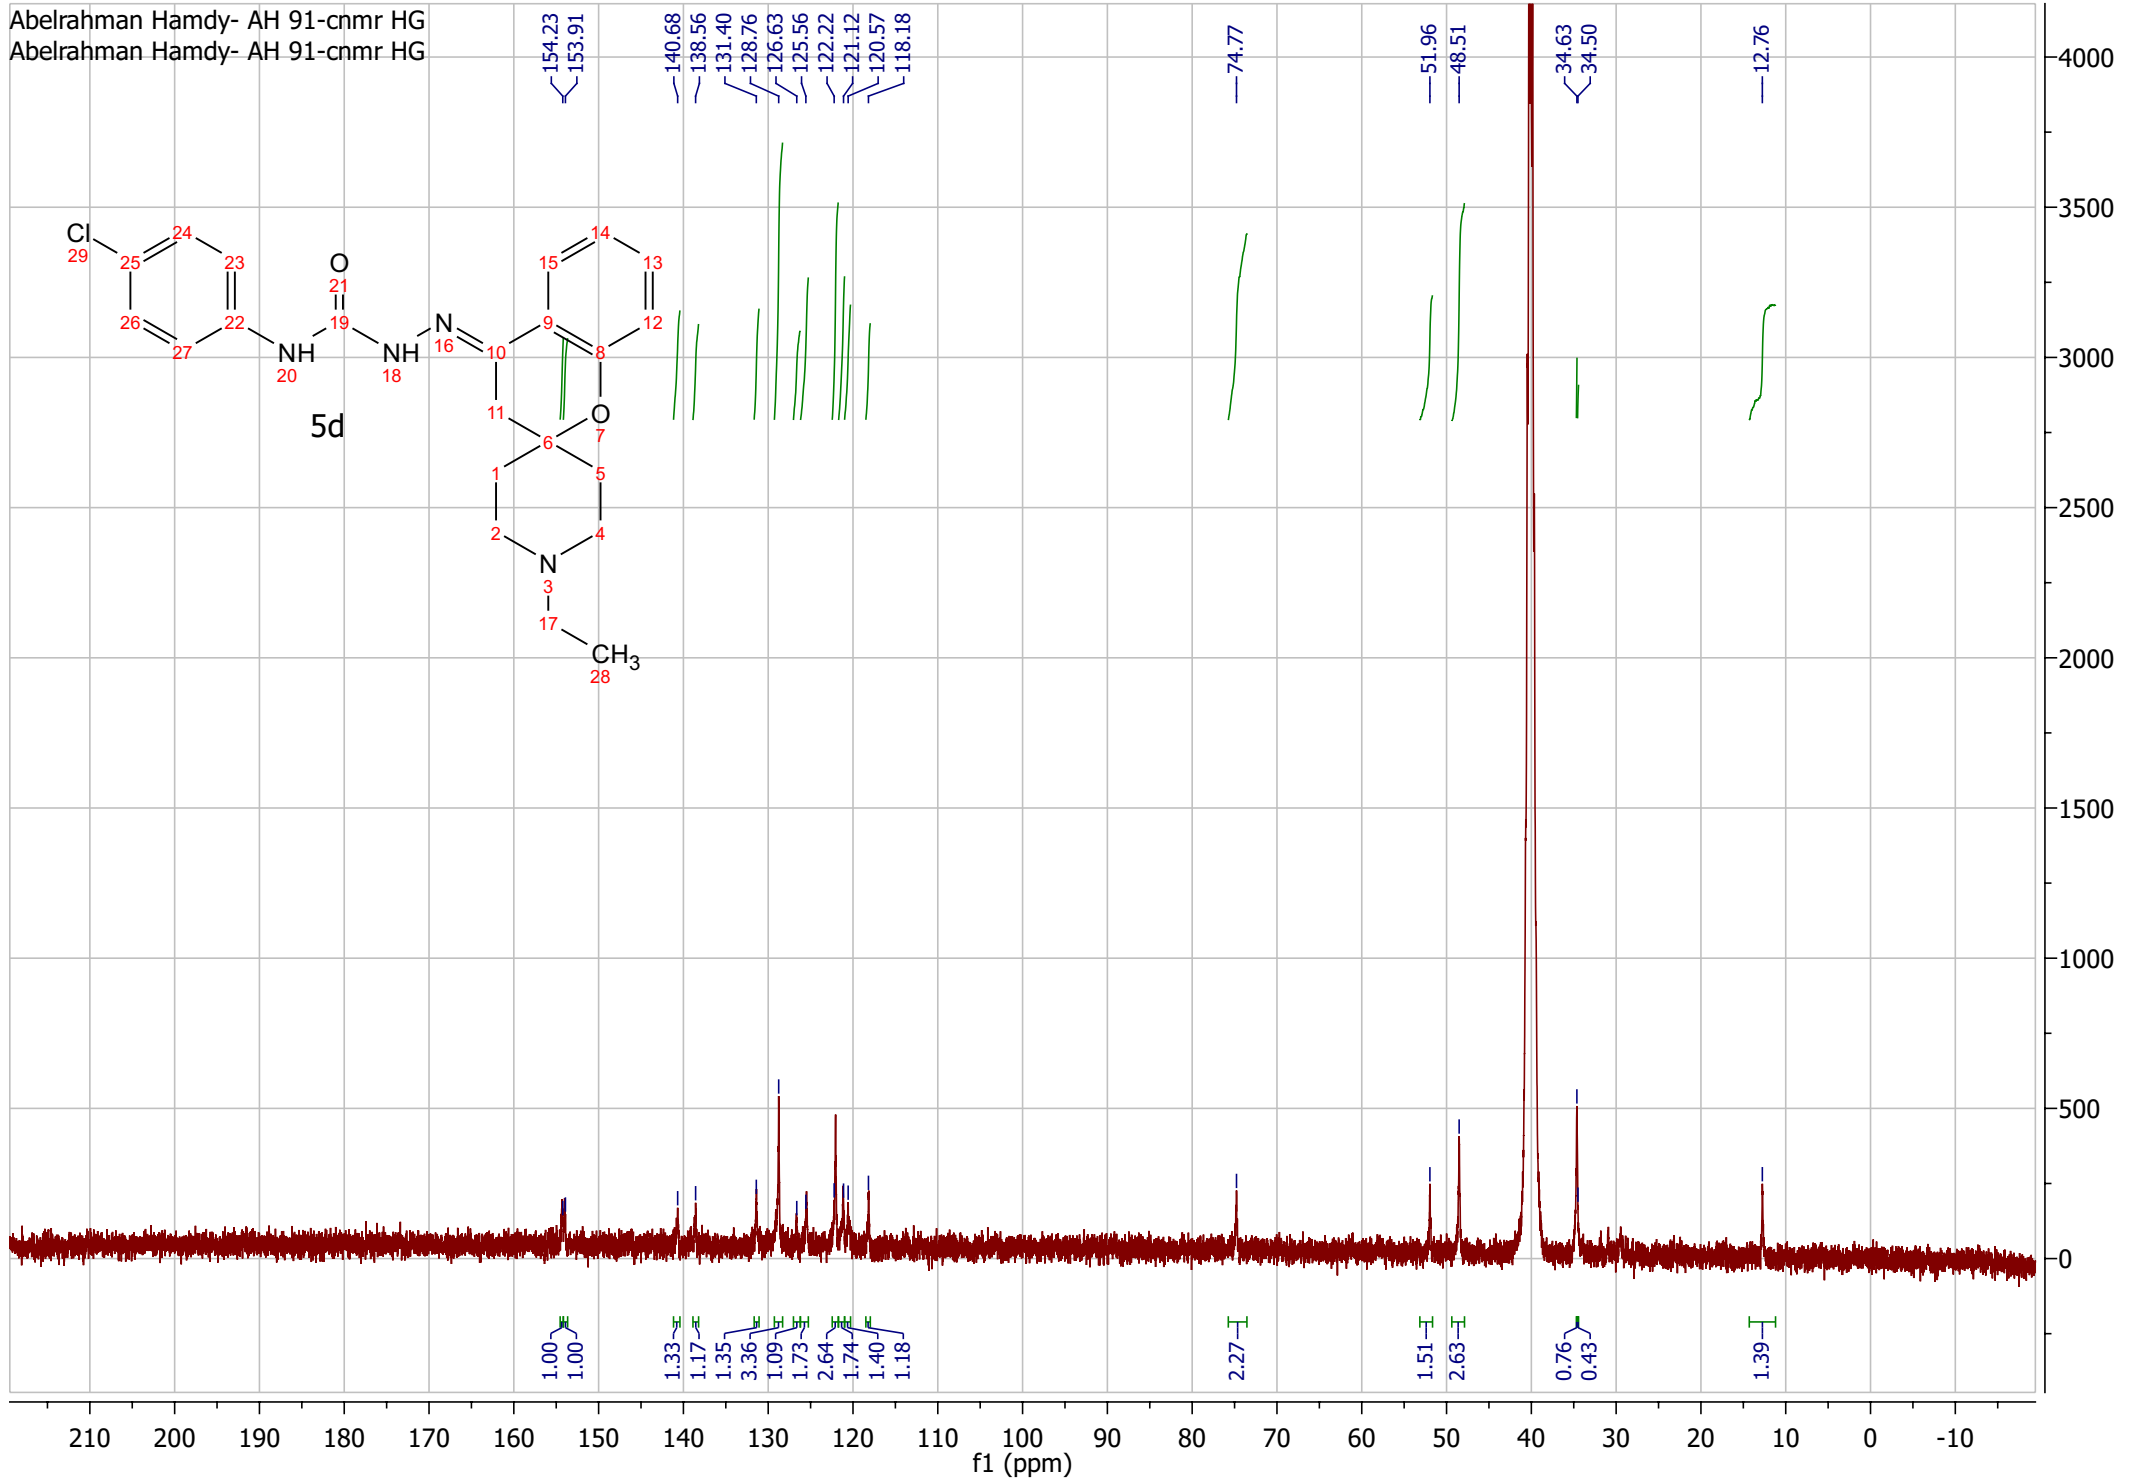

Abelrahman Hamdy- AH 121-cnmr HG  
Abelrahman Hamdy- AH 121-cnmr HG

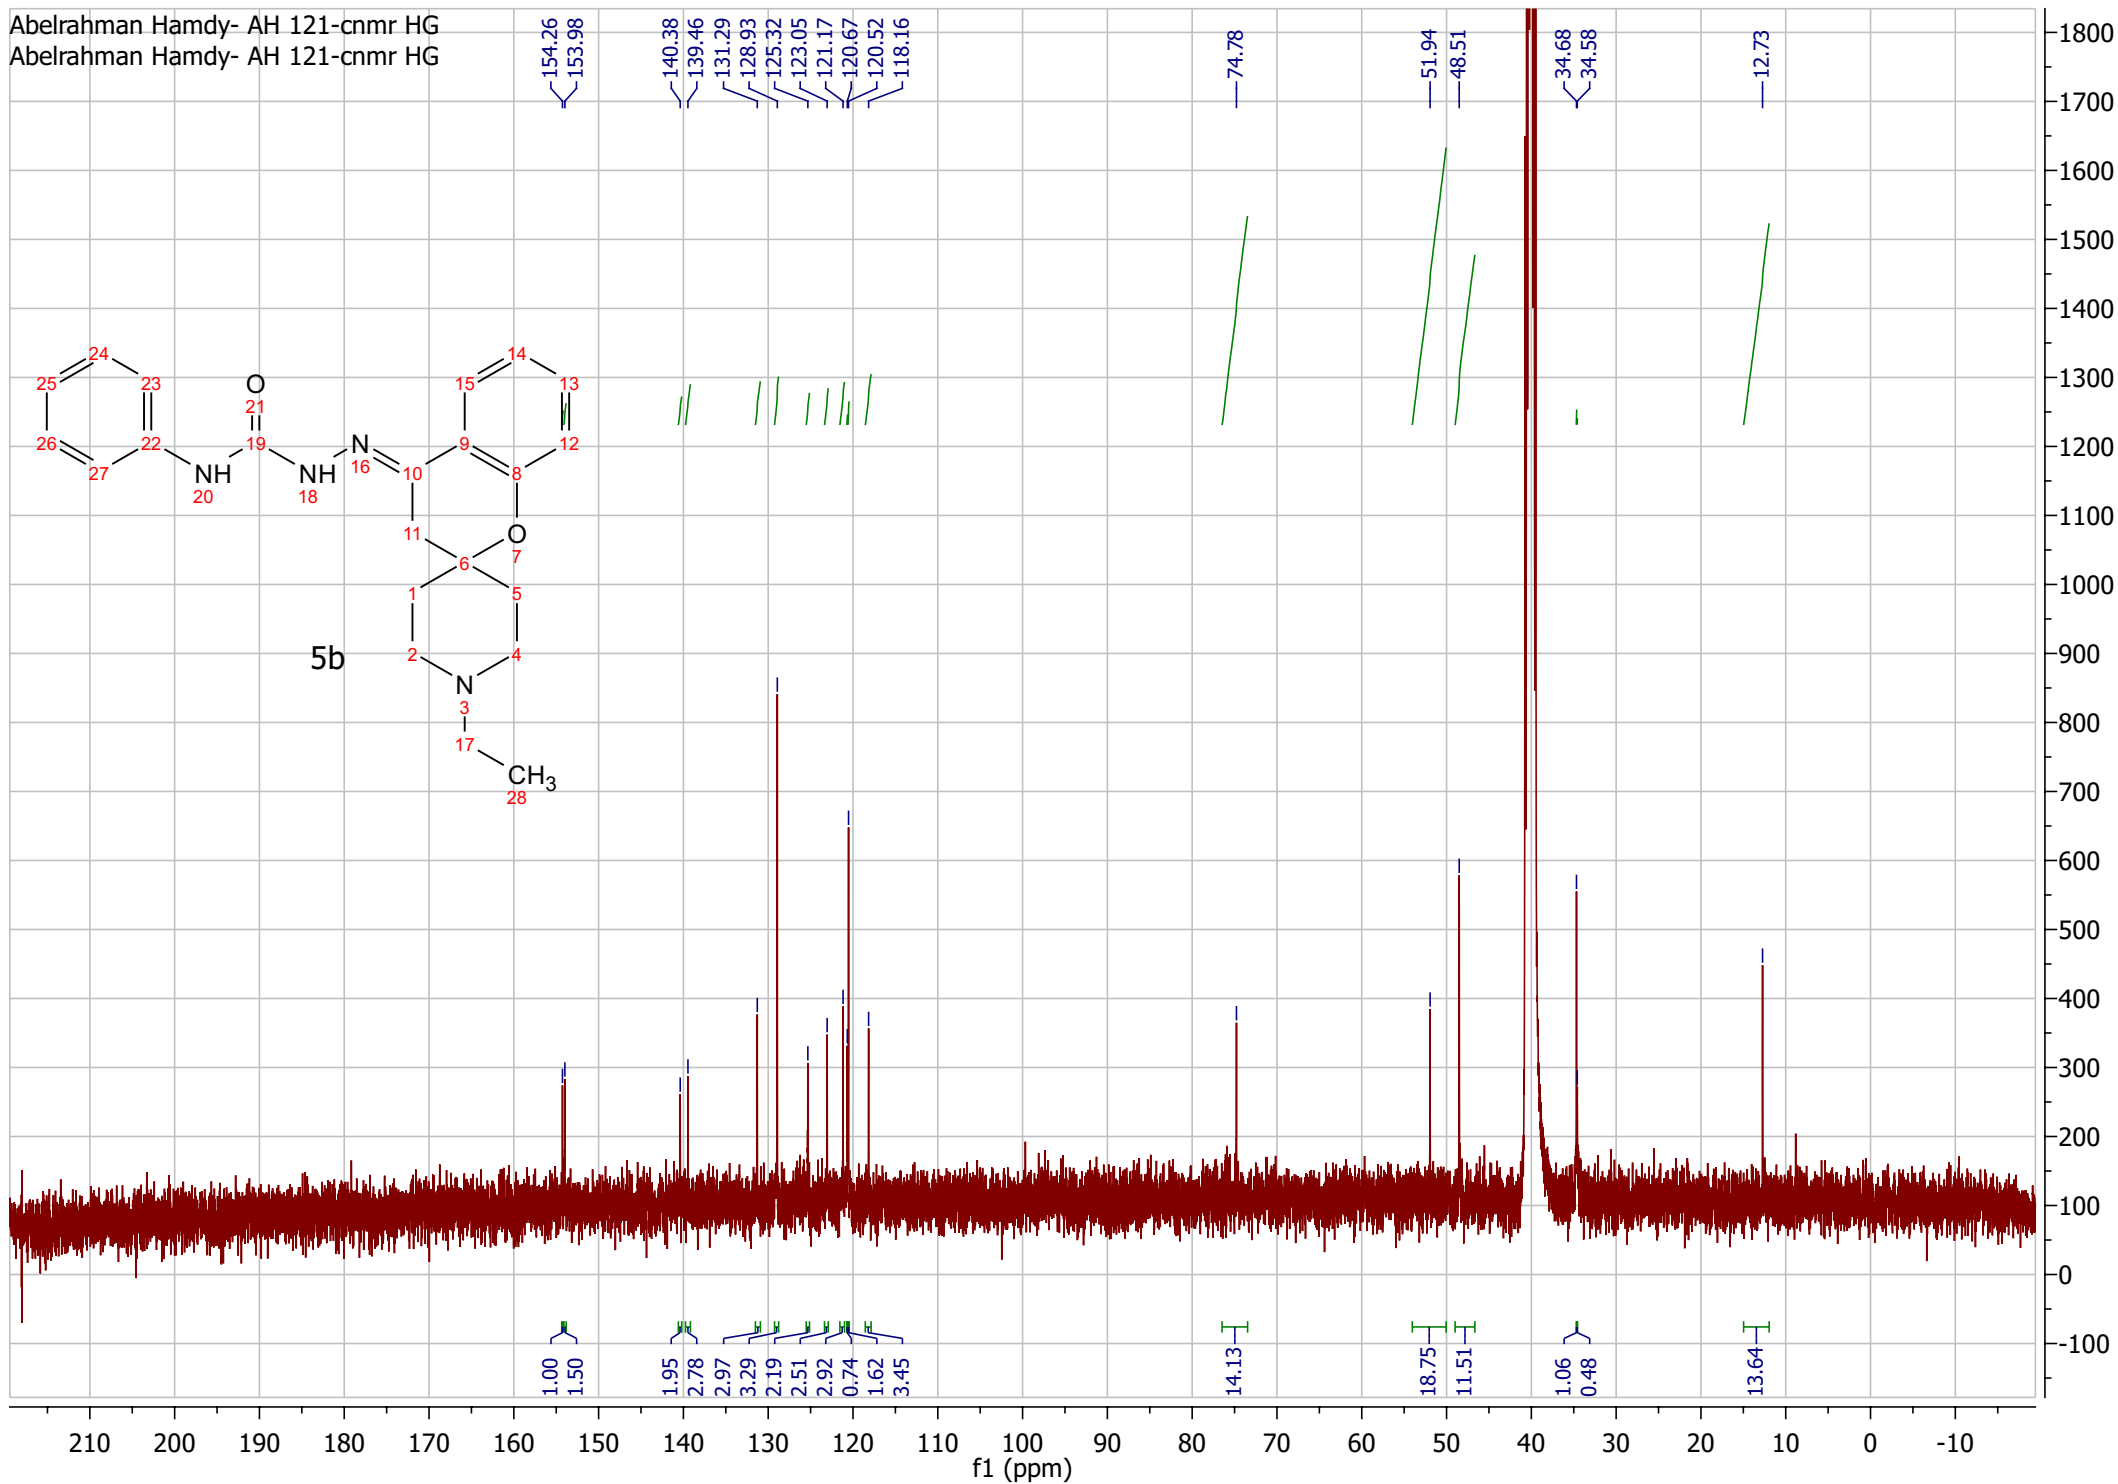

Abelrahman Hamdy- AH 84-cnmr HG  
Abelrahman Hamdy- AH 84-cnmr HG

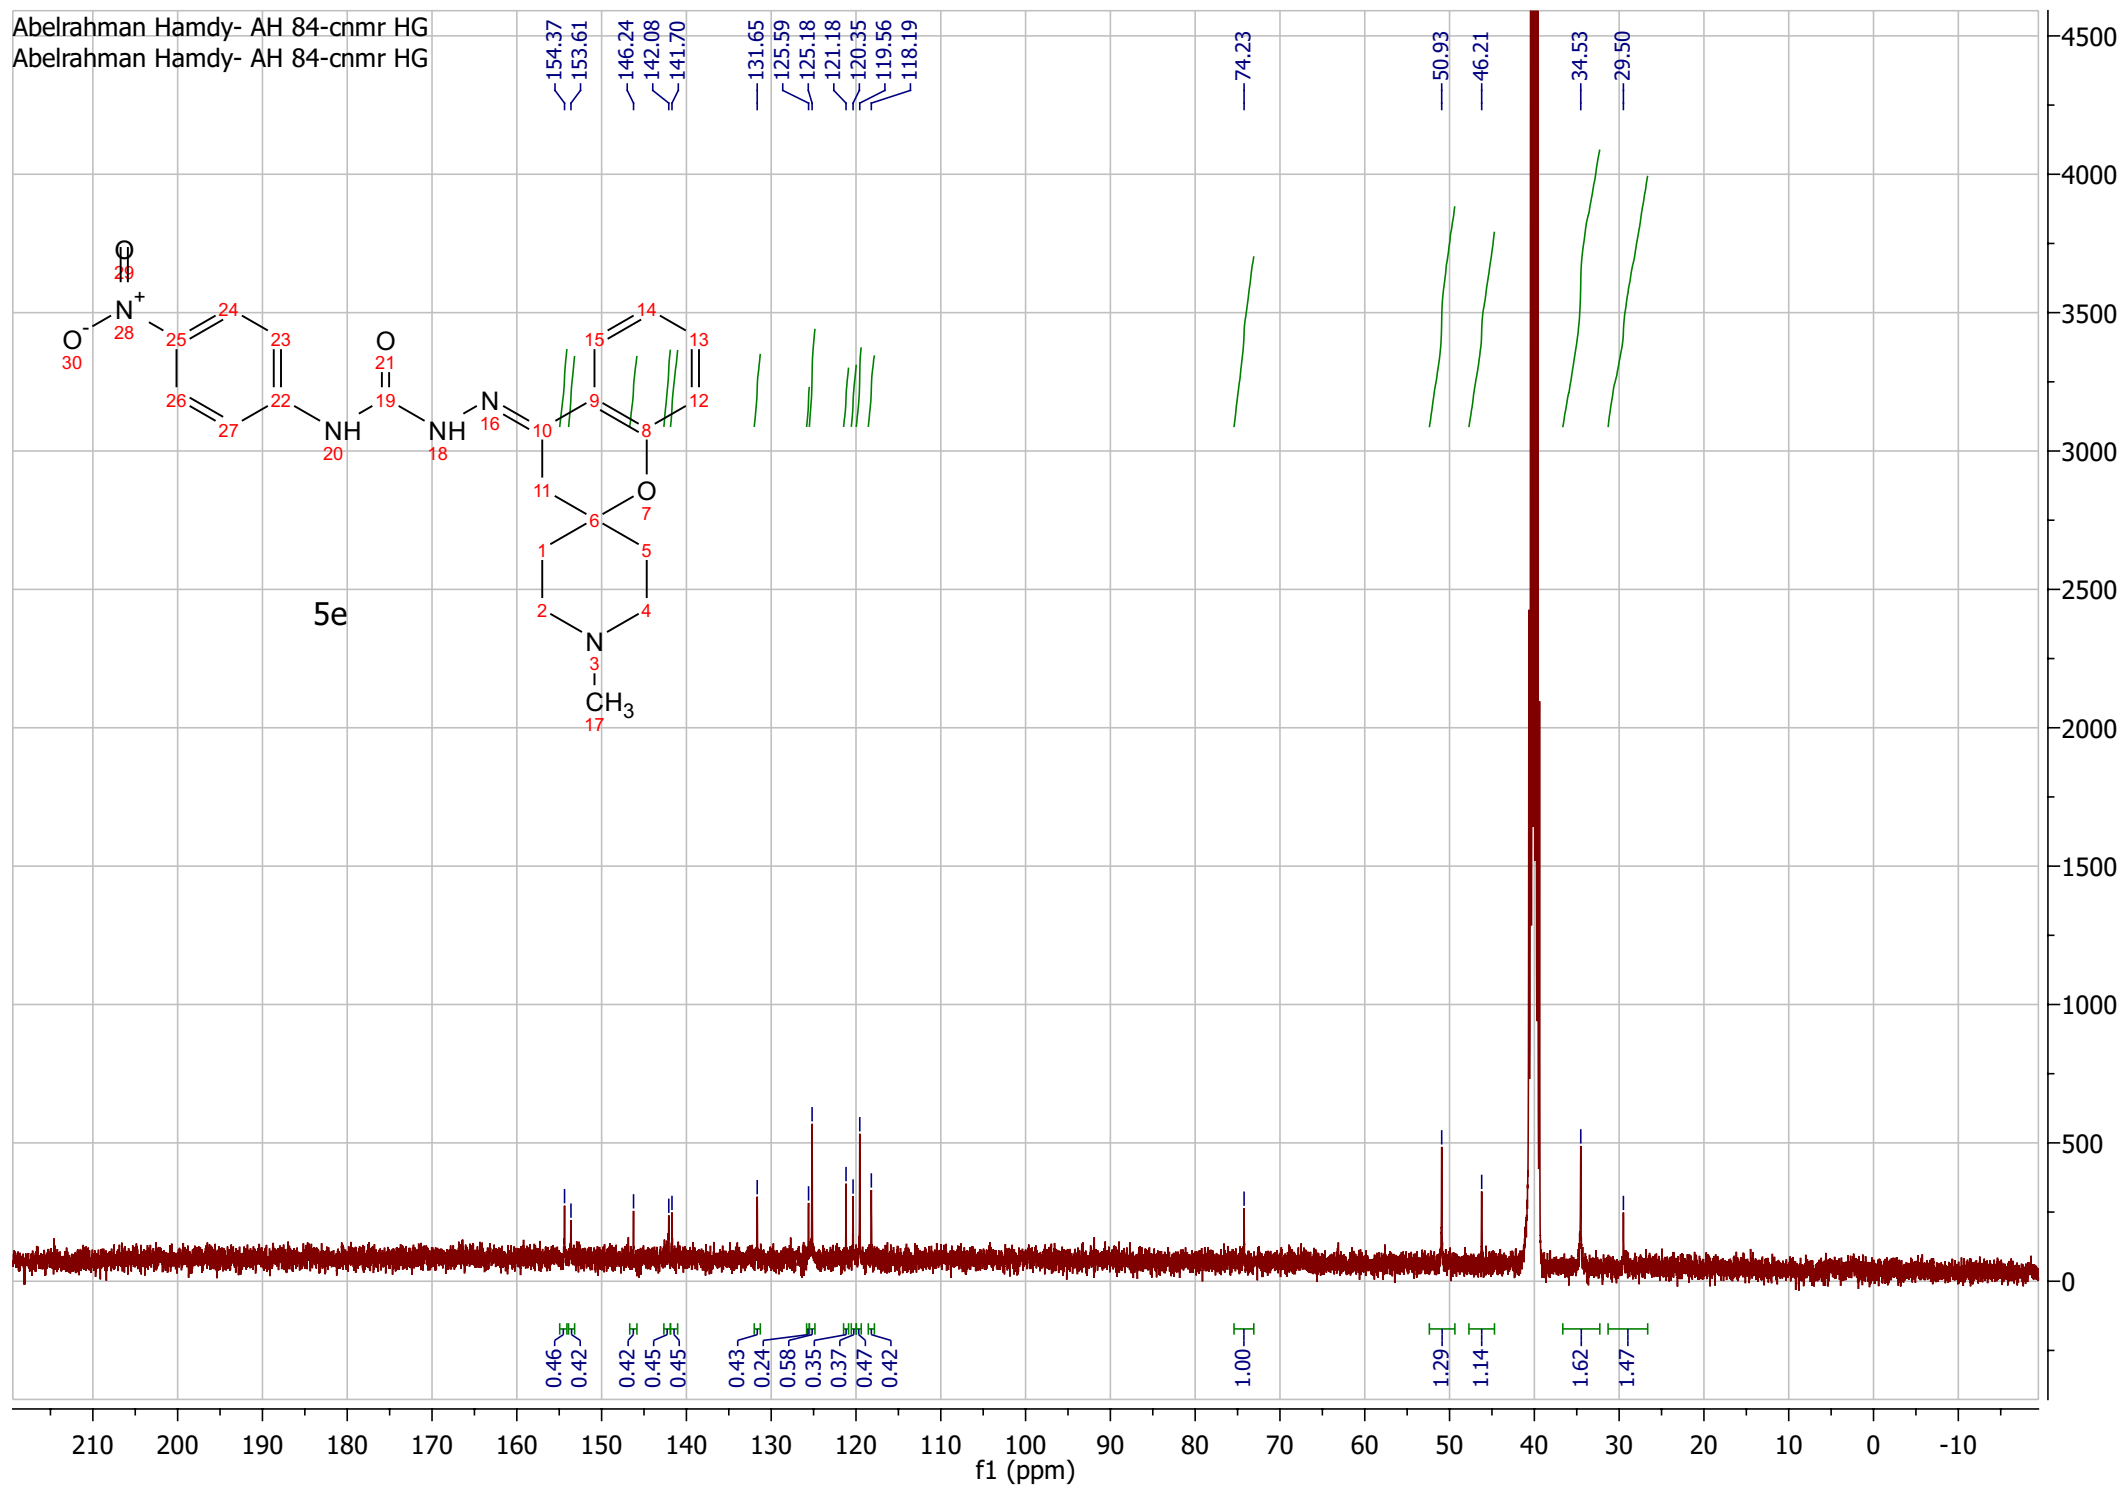

Abelrahman Hamdy- AH 92-cnmr HG  
Abelrahman Hamdy- AH 92-cnmr HG

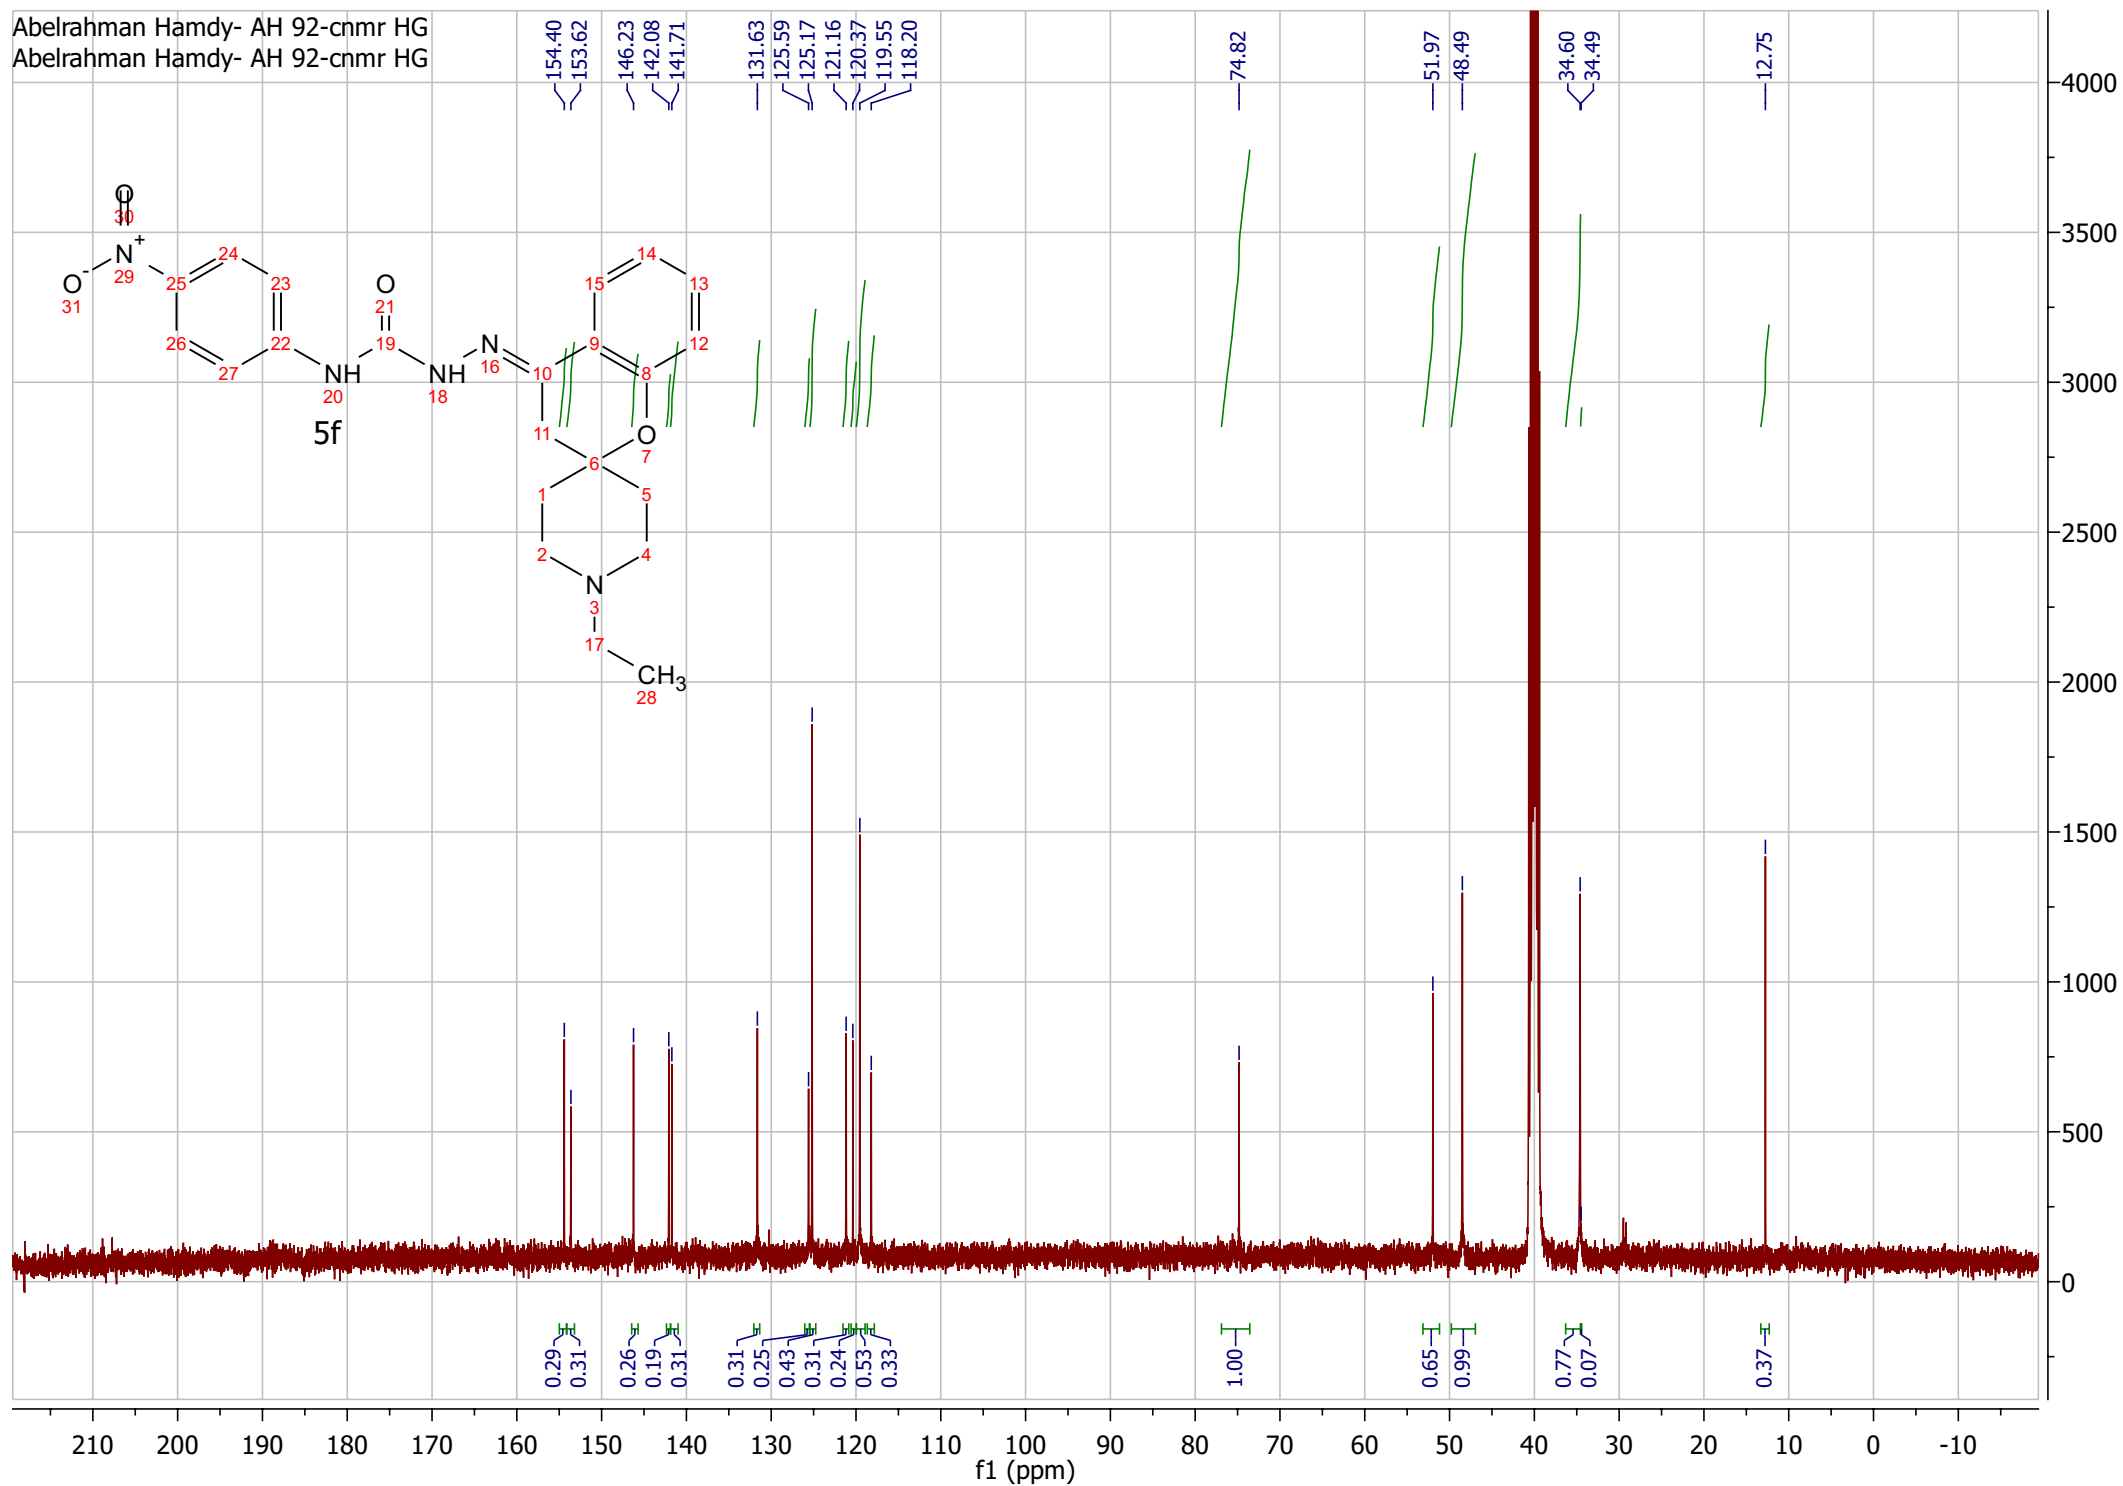

Supplement: mmc1.pdf [file mmc1.pdf]
